# Supplementary material
Source: PubMed Central journal article supplement (PMC7375207)
Supplement: NIHMS1585768-supplement-1.pdf [file NIHMS1585768-supplement-1.pdf]

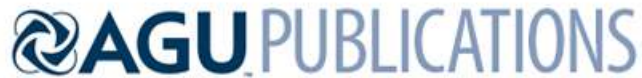

*[Journal of Geophysical Research - Atmospheres]*

Supporting Information for

**Atmospheric Research Over the Western North Atlantic Ocean Region and North American East Coast: A Review of Past Work and Challenges Ahead**

Armin Sorooshian<sup>1,2\*</sup>, Andrea F. Corral<sup>1</sup>, Rachel A. Braun<sup>1</sup>, Brian Cairns<sup>3</sup>, Ewan Crosbie<sup>4,5</sup>, Richard Ferrare<sup>4</sup>, Johnathan Hair<sup>4</sup>, Mary M. Kleb<sup>4</sup>, Ali Hossein Mardi<sup>1</sup>, Hal Maring<sup>6</sup>, Allison McComiskey<sup>7</sup>, Richard Moore<sup>4</sup>, David Painemal<sup>4,5</sup>, Amy Jo Scarino<sup>4,5</sup>, Joseph Schlosser<sup>1</sup>, Taylor Shingler<sup>4</sup>, Michael Shook<sup>4</sup>, Hailong Wang<sup>8</sup>, Xubin Zeng<sup>2</sup>, Luke Ziemba<sup>4</sup>, Paquita Zuidema<sup>9</sup>

1. Department of Chemical and Environmental Engineering, University of Arizona, Tucson, AZ.
2. Department of Hydrology and Atmospheric Sciences, University of Arizona, Tucson, AZ.
3. NASA Goddard Institute for Space Studies, New York, NY.
4. NASA Langley Research Center, Hampton, VA.
5. Science Systems and Applications, Inc., Hampton, VA.
6. NASA Headquarters, Washington, DC.
7. Brookhaven National Laboratory, Upton, NY.
8. Atmospheric Sciences and Global Change Division, Pacific Northwest National Laboratory, Richland, WA.
9. Rosenstiel School of Marine and Atmospheric Science, University of Miami, Miami, FL.

\*Corresponding author: Armin Sorooshian (armin@email.arizona.edu)

**Contents of this file**

Section S1, Table S1, Reference List

## **Introduction**

The supporting information includes a sub-section of text, a table to complement the main manuscript file, in addition to references.

## S1. Background on Air-Sea Interactions

The coupled atmosphere and ocean systems affect each other through exchanging sensible and latent heat, momentum, and trace gas fluxes across the air-sea interface. Such air-sea interactions affect atmospheric thermodynamics, clouds, precipitation, and circulation, which in turn impact ocean currents, temperature, and salinity. The spatial scale of air-sea interactions spans from local flux exchanges to oceanic wave generation, organization of MBL clouds, formation of storms/hurricanes, and global scale climate dynamics (e.g., ENSO). Large spatial variations in air-sea interaction on scales of km to tens of km can be driven by small-scale variability in SST and resultant variability in the MBL (e.g., Guymet et al., 1983). Understanding when, where, and how much air-sea flux exchange occurs is critically important for weather forecasting, climate modeling, assessment of environmental impacts, and management of natural resources (e.g., renewable energy applications).

The surface sensible heat flux  $F_{sh}$ , latent heat flux  $F_{lh}$ , and momentum flux (i.e., wind stress)  $F_{\mu}$  are usually determined using the eddy correlation technique, based on temporally averaged eddy covariances  $\overline{w'\theta'}$ ,  $\overline{w'q'}$ ,  $\overline{w'u'}$ , and  $\overline{w'v'}$  of fluctuating vertical velocity ( $w$ ), potential temperature ( $\theta$ ), specific humidity ( $q$ ), and horizontal wind components ( $u$ ,  $v$ ) (see Eqs. 1 – 3). The turbulent fluxes are challenging to measure directly, especially over remote oceans, without a stable platform. Thus, estimates of the fluxes are often parameterized with air-sea differences in potential temperature ( $\Delta\theta$ ), specific humidity ( $\Delta q$ ), and the horizontal wind components ( $\Delta u$  and  $\Delta v$ ).

$$F_{sh} = \rho c_p \overline{w'\theta'} \approx \rho c_p C_{sh} S \Delta\theta \quad (1)$$

$$F_{lh} = \rho L_v \overline{w'q'} \approx \rho L_v C_{lh} S \Delta q \quad (2)$$

$$F_{\mu} = \rho \overline{w'u'} \approx \rho c_p C_{\mu} S [(\Delta u)^2 + (\Delta v)^2]^{1/2} \quad (3)$$

The calculation of fluxes involves air density ( $\rho$ ), specific heat capacity at constant pressure ( $c_p$ ), latent heat of evaporation ( $L_v$ ), average wind speed ( $S$ ) relative to the ocean surface currents, and the bulk transfer coefficients  $C_{sh}$ ,  $C_{lh}$ , and  $C_{\mu}$ . The treatments of these coefficients in various weather and climate models were reviewed in Zeng et al. (1998). These transfer coefficients can be treated differently for various purposes, either using constant values, separately, under stable, neutral, and unstable conditions (e.g., Weller et al., 1995) or further parameterized as a function of atmospheric stability and ocean surface roughness (e.g., Fairall et al., 1996). Primary state variables for calculating air-sea heat and momentum fluxes (more specifically, the air-sea differences), including ocean skin temperature, near-surface air temperature, humidity, and wind speed, can be measured directly. The eddy covariances can also be directly measured from a variety of platforms over oceans with some challenges and uncertainties (Cronin et al., 2019). Parameterized relationships in the bulk aerodynamic formulae (Eqs. 1 – 3) can then be used to estimate the transfer coefficients and/or surface roughness. Once the bulk algorithms are

evaluated and calibrated in field experiments, they are then broadly applied in satellite retrievals and numerical models (e.g., Fairall et al., 2003; Fairall et al., 1996; Zeng et al., 1998).

**Table S1:** Comprehensive summary of peer-reviewed publications related to atmospheric research over the North American East Coast and WNAO region, categorized by the following topics: Gas/Aerosol/Wet Dep = studies examining any aspect of gas-phase, aerosol, or wet deposition properties, respectively, such as composition; Clouds = studies examining cloud/storm characteristics; ACI = aerosol-cloud interactions; Air-Sea = air-sea interactions; Dev't/Validation = studies examining any aspect of a new method, model, or instrument and/or any validation studies between observations and models or retrievals; Met = studies with an extensive focus on meteorology and air flow analysis. Publications in alphabetical order by first author last name are grouped into campaigns/monitoring programs that are listed in alphabetical order. Rows showing multiple campaigns (e.g., "ICARTT/NEAQS 2002") indicate studies using data from each of the listed campaigns. "Bermuda" contains studies linked to other categories (i.e., AEROCE), while some AIRMAP studies fall into other campaigns (i.e., NEAQS 2002, ICARTT). IAGOS includes works from CARIBIC and MOZAIC. "Misc" includes studies not fitting under the other campaign names. Some publications addressed multiple topics and were therefore counted in multiple categories.

| Campaign   | Reference                  | Gas | Aerosol | Wet Dep | Clouds | ACI | Air-Sea | Dev't/Val | Met |
|------------|----------------------------|-----|---------|---------|--------|-----|---------|-----------|-----|
| Aerosols99 | Bates et al. (2001)        |     | x       |         |        |     |         |           |     |
| Aerosols99 | Bates et al. (2002)        |     | x       |         |        |     |         |           |     |
| Aerosols99 | Crimmins et al. (2004)     |     | x       |         |        |     |         |           |     |
| Aerosols99 | Hernandez et al. (2001)    | x   |         |         |        |     |         |           |     |
| Aerosols99 | Massling et al. (2003)     |     | x       |         |        |     |         |           |     |
| Aerosols99 | Quinn et al. (2001)        |     | x       |         |        |     |         |           |     |
| Aerosols99 | Thompson et al. (2000)     | x   |         |         |        |     |         |           |     |
| Aerosols99 | Voss et al. (2001)         |     | x       |         |        |     |         |           |     |
| AIRMAP     | Ambrose et al. (2010)      | x   |         |         |        |     |         | x         |     |
| AIRMAP     | Ambrose et al. (2012)      | x   |         |         |        |     |         | x         |     |
| AIRMAP     | DeBell et al. (2004a)      | x   | x       |         |        |     |         |           |     |
| AIRMAP     | DeBell et al. (2004b)      | x   | x       |         |        |     |         |           |     |
| AIRMAP     | Fischer et al. (2004)      | x   |         |         |        |     |         |           | x   |
| AIRMAP     | Hegarty et al. (2007)      | x   |         |         |        |     |         |           | x   |
| AIRMAP     | Mao and Talbot (2004a)     | x   |         |         |        |     |         |           |     |
| AIRMAP     | Mao and Talbot (2004b)     | x   |         |         |        |     |         |           | x   |
| AIRMAP     | Mao and Talbot (2012)      | x   | x       |         |        |     |         |           |     |
| AIRMAP     | Mao et al. (2012)          | x   | x       |         |        |     |         |           |     |
| AIRMAP     | Place et al. (2010)        |     | x       |         |        |     |         |           |     |
| AIRMAP     | Sigler et al. (2009)       | x   |         |         |        |     |         |           |     |
| AIRMAP     | Talbot et al. (2005)       | x   |         |         |        |     |         |           |     |
| AIRMAP     | Ziemba et al. (2006)       |     | x       |         |        |     |         |           |     |
| AIRMAP     | Ziemba et al. (2011)       |     | x       |         |        |     |         |           |     |
| Bermuda    | Ahmad et al. (2010)        |     | x       |         |        |     |         | x         |     |
| Bermuda    | Allen et al. (1996)        |     |         |         |        |     |         | x         |     |
| Bermuda    | Altieri et al. (2013)      |     |         | x       |        |     |         |           |     |
| Bermuda    | Altieri et al. (2014)      |     |         | x       |        |     |         |           |     |
| Bermuda    | Altieri et al. (2016)      |     | x       | x       |        | x   |         |           |     |
| Bermuda    | Anderson et al. (1996)     |     | x       |         |        |     |         |           |     |
| Bermuda    | Arimoto et al. (1992)      |     | x       |         |        |     |         |           |     |
| Bermuda    | Arimoto et al. (1995)      |     | x       |         |        |     |         |           |     |
| Bermuda    | Arimoto et al. (1997)      |     | x       |         |        |     |         |           |     |
| Bermuda    | Arimoto et al. (1999)      |     | x       |         |        |     |         |           |     |
| Bermuda    | Arimoto (2001)             |     | x       |         |        |     |         |           |     |
| Bermuda    | Arimoto et al. (2002)      |     | x       |         |        |     |         | x         |     |
| Bermuda    | Arimoto et al. (2003)      |     | x       |         |        |     |         |           |     |
| Bermuda    | Aryal et al. (2014)        |     | x       |         |        |     |         |           |     |
| Bermuda    | Babin et al. (2004)        |     |         |         | x      |     | x       |           |     |
| Bermuda    | Baker and Hites (1999)     | x   |         |         |        |     |         |           |     |
| Bermuda    | Bates and Peters (2007)    |     |         |         |        |     | x       |           |     |
| Bermuda    | Benetti et al. (2017)      | x   |         |         |        |     |         |           |     |
| Bermuda    | Bergamaschi et al. (2009)  |     |         |         |        |     |         | x         |     |
| Bermuda    | Berkelhammer et al. (2016) | x   |         |         |        |     |         |           |     |
| Bermuda    | Black and Dickey (2008)    |     |         |         | x      |     |         |           |     |
| Bermuda    | Bonne et al. (2015)        |     |         |         |        |     |         |           | x   |
| Bermuda    | Boylan et al. (2015)       | x   |         |         |        |     |         |           |     |
| Bermuda    | Chen and Duce (1983)       | x   |         |         |        |     |         |           |     |
| Bermuda    | Chen et al. (2009)         |     |         | x       |        |     |         |           |     |
| Bermuda    | Chevallier et al. (2010)   | x   |         |         |        |     |         |           |     |
| Bermuda    | Church et al. (1982)       |     |         | x       |        |     |         |           |     |
| Bermuda    | Church et al. (1984)       |     |         | x       |        |     |         |           |     |

| Campaign | Reference                  | Gas | Aerosol | Wet Dep | Clouds | ACI | Air-Sea | Dev't/Val | Met |
|----------|----------------------------|-----|---------|---------|--------|-----|---------|-----------|-----|
| Bermuda  | Colle et al. (1995)        |     | x       |         |        |     |         |           |     |
| Bermuda  | Conte and Weber (2002a)    |     | x       |         |        |     |         |           |     |
| Bermuda  | Conte and Weber (2002b)    |     | x       |         |        |     |         |           |     |
| Bermuda  | Cooper et al. (1998)       | x   |         |         |        |     |         |           |     |
| Bermuda  | Cornell et al. (1995)      |     |         | x       |        |     |         |           |     |
| Bermuda  | Cornell et al. (1998)      |     |         | x       |        |     |         |           |     |
| Bermuda  | Cutter (1993)              |     |         | x       |        |     |         |           |     |
| Bermuda  | Dickey et al. (1998)       |     |         |         | x      |     | x       |           |     |
| Bermuda  | Ellis et al. (1993)        |     | x       |         |        |     |         |           |     |
| Bermuda  | Ennis and Sievering (1990) |     | x       |         |        |     |         |           |     |
| Bermuda  | Fishwick et al. (2014)     |     |         |         |        |     | x       |           |     |
| Bermuda  | Galloway et al. (1982)     |     |         | x       |        |     |         |           |     |
| Bermuda  | Galloway et al. (1988a)    |     |         | x       |        |     |         |           |     |
| Bermuda  | Galloway et al. (1989)     |     |         | x       |        |     |         |           |     |
| Bermuda  | Galloway et al. (1993)     |     | x       | x       |        | x   |         |           |     |
| Bermuda  | Gawor et al. (2014)        | x   |         |         |        |     |         |           |     |
| Bermuda  | Genualdi et al. (2010)     | x   |         |         |        |     |         | x         |     |
| Bermuda  | Gichuki and Mason (2014)   | x   | x       |         |        |     |         |           |     |
| Bermuda  | Gobel et al. (2013)        |     | x       | x       |        |     |         |           |     |
| Bermuda  | Guishard et al. (2007)     |     |         |         | x      |     |         |           |     |
| Bermuda  | Harner et al. (2006)       | x   |         |         |        |     |         | x         |     |
| Bermuda  | Hastings et al. (2003)     |     |         | x       |        |     |         |           |     |
| Bermuda  | Hirsch et al. (2006)       |     |         |         |        |     | x       |           |     |
| Bermuda  | Hoffman and Duce (1976)    |     | x       |         |        |     | x       |           |     |
| Bermuda  | Hoffman and Duce (1977)    |     | x       |         |        |     |         |           |     |
| Bermuda  | Hoffman et al. (1977)      |     | x       |         |        |     |         |           |     |
| Bermuda  | Holmes and Miller (2004)   |     | x       |         |        |     |         |           |     |
| Bermuda  | Huang et al. (1996)        |     | x       |         |        |     |         |           |     |
| Bermuda  | Huang et al. (1997)        |     | x       |         |        |     |         | x         |     |
| Bermuda  | Huang et al. (1999)        |     | x       |         |        |     |         |           |     |
| Bermuda  | Hutter et al. (1995)       |     | x       |         |        |     |         |           |     |
| Bermuda  | Jickells et al. (1982)     |     |         | x       |        |     |         |           |     |
| Bermuda  | Jickells et al. (1990)     |     |         |         |        |     | x       |           |     |
| Bermuda  | Jickells et al. (1992)     |     |         | x       |        |     |         |           |     |
| Bermuda  | Jickells et al. (1994)     |     | x       | x       |        |     | x       |           |     |
| Bermuda  | Jickells et al. (1998)     |     | x       | x       |        |     | x       |           |     |
| Bermuda  | Kadko and Prospero (2011)  |     |         | x       |        |     | x       |           |     |
| Bermuda  | Kadko et al. (2015)        |     |         | x       |        |     | x       | x         |     |
| Bermuda  | Keene and Savoie (1998)    |     | x       |         |        |     |         |           |     |
| Bermuda  | Keene et al. (1986)        |     |         | x       |        |     |         | x         |     |
| Bermuda  | Keene et al. (2002a)       |     | x       |         |        |     |         |           |     |
| Bermuda  | Keene et al. (2007a)       |     | x       |         |        |     | x       |           |     |
| Bermuda  | Keene et al. (2014)        |     | x       | x       |        |     |         |           |     |
| Bermuda  | Keene et al. (2015)        |     |         | x       |        |     |         |           |     |
| Bermuda  | Kim et al. (1999)          |     |         | x       |        |     |         |           |     |
| Bermuda  | Kim et al. (2019)          |     |         |         | x      | x   |         |           |     |
| Bermuda  | Knapp et al. (2010)        |     |         | x       |        |     | x       |           |     |
| Bermuda  | Koblizkova et al. (2012a)  | x   |         |         |        |     |         | x         |     |
| Bermuda  | Koblizkova et al. (2012b)  | x   |         |         |        |     |         | x         |     |

| Campaign | Reference                     | Gas | Aerosol | Wet Dep | Clouds | ACI | Air-Sea | Dev't/Val | Met |
|----------|-------------------------------|-----|---------|---------|--------|-----|---------|-----------|-----|
| Bermuda  | Koch et al. (2009)            |     |         |         | x      |     | x       |           |     |
| Bermuda  | Lee et al. (2007)             | x   |         |         |        |     |         |           |     |
| Bermuda  | Lim et al. (1994)             |     |         | x       |        |     |         |           |     |
| Bermuda  | Lin et al. (2012)             |     | x       |         |        |     |         |           |     |
| Bermuda  | Lomas et al. (2009)           |     |         |         | x      |     | x       |           |     |
| Bermuda  | Lomas et al. (2013)           |     |         |         |        |     | x       |           |     |
| Bermuda  | Mackey et al. (2012a)         |     | x       |         |        |     | x       |           |     |
| Bermuda  | Mackey et al. (2012b)         |     | x       |         |        |     | x       |           |     |
| Bermuda  | MacLeod et al. (2013)         | x   |         |         |        |     |         |           |     |
| Bermuda  | Mahowald et al. (1997)        |     | x       |         |        |     |         | x         |     |
| Bermuda  | Maring and Schwartz (1994)    |     | x       |         |        |     |         | x         |     |
| Bermuda  | McInnes et al. (2013)         |     |         |         |        |     | x       |           |     |
| Bermuda  | Mead et al. (2013)            |     | x       |         |        |     |         |           |     |
| Bermuda  | Merrill (1994)                |     |         |         |        |     |         |           | x   |
| Bermuda  | Merrill et al. (1996)         | x   |         |         |        |     |         |           | x   |
| Bermuda  | Michaels et al. (1993)        |     |         | x       |        |     | x       |           |     |
| Bermuda  | Michaels and Knap (1996)      |     |         |         |        |     | x       |           |     |
| Bermuda  | Miller and Harris (1985)      |     |         |         |        |     |         |           | x   |
| Bermuda  | Miller et al. (2013)          |     |         |         | x      |     |         |           |     |
| Bermuda  | Milne et al. (2000)           | x   |         |         |        |     |         |           |     |
| Bermuda  | Moody and Galloway (1988)     |     |         | x       |        |     |         |           |     |
| Bermuda  | Moody et al. (1995)           | x   |         |         |        |     |         |           | x   |
| Bermuda  | Moody et al. (2014)           |     | x       |         |        |     |         |           | x   |
| Bermuda  | Muhs et al. (2012)            |     | x       |         |        |     |         |           |     |
| Bermuda  | Nelson (1998)                 |     |         |         | x      |     | x       |           |     |
| Bermuda  | Oltmans and Levy (1992)       | x   |         |         |        |     |         |           |     |
| Bermuda  | Oltmans and Levy (1994)       | x   |         |         |        |     |         |           |     |
| Bermuda  | Oltmans et al. (2006)         | x   |         |         |        |     |         |           |     |
| Bermuda  | Oltmans et al. (2013)         | x   |         |         |        |     |         |           |     |
| Bermuda  | Orcutt et al. (2001)          |     |         |         |        |     | x       |           |     |
| Bermuda  | Panshin and Hites (1994)      | x   |         |         |        |     |         |           |     |
| Bermuda  | Parrish et al. (2016)         | x   |         |         |        |     |         |           |     |
| Bermuda  | Petron et al. (2002)          | x   |         |         |        |     |         | x         |     |
| Bermuda  | Pozo et al. (2006)            | x   |         |         |        |     |         |           |     |
| Bermuda  | Pozo et al. (2009)            | x   |         |         |        |     |         |           |     |
| Bermuda  | Prados et al. (1999)          | x   |         |         |        |     |         |           |     |
| Bermuda  | Rigby et al. (2010)           | x   |         |         |        |     |         |           |     |
| Bermuda  | Robertson et al. (2005)       | x   |         |         |        |     |         | x         |     |
| Bermuda  | Saikawa et al. (2014)         | x   |         |         |        |     |         | x         |     |
| Bermuda  | Savoie et al. (2002)          |     | x       |         |        |     |         |           |     |
| Bermuda  | Sedwick et al. (2007)         |     | x       |         |        |     | x       |           |     |
| Bermuda  | Shelley et al. (2012)         |     | x       |         |        |     | x       |           |     |
| Bermuda  | Shoeib et al. (2010)          | x   |         |         |        |     |         |           |     |
| Bermuda  | Sholkovitz and Sedwick (2006) |     | x       |         |        |     |         | x         |     |
| Bermuda  | Sholkovitz et al. (1993)      |     | x       | x       |        |     |         |           |     |
| Bermuda  | Sholkovitz et al. (2009)      |     | x       |         |        |     | x       |           |     |
| Bermuda  | Sholkovitz et al. (2010)      |     | x       | x       |        |     |         |           |     |
| Bermuda  | Sholkovitz et al. (2012)      |     | x       |         |        |     |         |           |     |
| Bermuda  | Shunthirasingham et al. 2010  | x   |         |         |        |     |         |           |     |
| Bermuda  | Smirnov et al. (2003)         |     |         |         |        |     |         | x         |     |



| Campaign | Reference                  | Gas | Aerosol | Wet Dep | Clouds | ACI | Air-Sea | Dev't/Val | Met |
|----------|----------------------------|-----|---------|---------|--------|-----|---------|-----------|-----|
| Bermuda  | Steen-Larsen et al. (2014) | x   |         |         |        |     |         | x         |     |
| Bermuda  | Steinberg et al. (2001)    |     |         |         |        |     | x       |           |     |
| Bermuda  | Tarasova et al. (2007)     | x   |         |         |        |     |         |           |     |
| Bermuda  | Thompson et al. (2014)     | x   |         |         |        |     |         | x         |     |
| Bermuda  | Tian et al. (2008)         |     | x       | x       |        |     | x       |           |     |
| Bermuda  | Todd et al. (2003)         |     | x       | x       |        | x   |         |           |     |
| Bermuda  | Tomza et al. (2001)        |     | x       |         |        |     |         | x         |     |
| Bermuda  | Turekian et al. (2001)     |     | x       |         |        |     |         |           |     |
| Bermuda  | Turekian et al. (2003)     |     | x       |         |        |     |         |           |     |
| Bermuda  | Turner et al. (2016)       | x   |         |         |        |     |         |           |     |
| Bermuda  | Veron et al. (1992)        |     | x       | x       |        |     |         |           |     |
| Bermuda  | Veron et al. (1993)        |     |         | x       |        |     | x       |           |     |
| Bermuda  | Veron et al. (1998)        |     |         | x       |        |     | x       |           |     |
| Bermuda  | Volpe and Spivack (1994)   |     | x       |         |        |     |         |           |     |
| Bermuda  | Waser and Bacon (1995)     |     |         | x       |        |     |         |           |     |
| Bermuda  | Witek et al. (2013)        |     | x       |         |        |     |         | x         |     |
| Bermuda  | Wolff et al. (1986)        | x   | x       |         |        |     |         |           |     |
| Bermuda  | Zedler et al. (2002)       |     |         |         | x      |     | x       |           |     |
| Bermuda  | Zhou et al. (2008)         |     | x       |         |        |     | x       |           |     |
| CASP     | Stewart 1991               |     |         |         | x      |     |         |           |     |
| CITE 3   | Anderson et al. (1993)     | x   | x       |         |        |     |         |           |     |
| CITE 3   | Andreae et al. (1993)      | x   |         |         |        |     |         |           |     |
| CITE 3   | Cooper and Saltzman (1993) | x   |         |         |        |     |         |           |     |
| CITE 3   | Ferek and Hegg (1993)      | x   |         |         |        |     |         |           |     |
| CITE 3   | Hoell et al. (1993)        | x   |         |         |        |     |         | x         |     |
| CITE 3   | Matrai et al. (1993)       | x   |         |         |        |     |         |           |     |
| CITE 3   | Shipham et al. (1993)      |     |         |         |        |     |         |           | x   |
| CLAMS    | Castanho et al. (2005)     |     | x       |         |        |     |         |           |     |
| CLAMS    | Chowdhary et al. (2005)    |     | x       |         |        |     |         | x         |     |
| CLAMS    | Gatebe et al. (2005)       |     | x       |         |        |     |         | x         |     |
| CLAMS    | Jin et al. (2005)          |     |         |         |        |     |         | x         |     |
| CLAMS    | Kahn et al. (2005)         |     | x       |         |        |     |         | x         |     |
| CLAMS    | Levy et al. (2005)         |     | x       |         |        |     |         | x         |     |
| CLAMS    | Magi et al. (2005)         |     | x       |         |        |     |         | x         |     |
| CLAMS    | Redemann et al. (2005)     |     | x       |         |        |     |         | x         |     |
| CLAMS    | Reidmiller et al. (2006)   |     | x       |         |        |     |         | x         |     |
| CLAMS    | Remer et al. (2005)        |     | x       |         |        |     |         | x         |     |
| CLAMS    | Smith et al. (2005a)       |     | x       |         |        |     |         | x         |     |
| CLAMS    | Smith et al. (2005b)       | x   |         |         |        |     |         | x         |     |
| CLIMODE  | Andersson et al. (2013)    |     |         |         |        |     | x       |           |     |
| CONTRACE | Huntrieser et al. (2005)   | x   |         |         |        |     |         |           |     |
| COVE     | Jin et al. (2002)          |     |         |         |        |     |         | x         |     |
| COVE     | Jin et al. (2004)          |     |         |         |        |     |         | x         |     |
| COVE     | Kato et al. (2002)         |     |         |         |        |     |         | x         |     |
| COVE     | Kratz et al. (2010)        |     |         |         |        |     |         | x         |     |
| COVE     | Martins et al. (2009)      |     |         |         |        |     |         | x         |     |
| COVE     | Rutledge et al. (2006)     |     |         |         |        |     |         | x         |     |
| COVE     | Su et al. (2002)           |     |         |         |        |     |         | x         |     |
| COVE     | Zibordi et al. (2006)      |     |         |         |        |     |         | x         |     |
| COVE     | Zibordi et al. (2009)      |     |         |         |        |     |         | x         |     |

| Campaign    | Reference                     | Gas | Aerosol | Wet Dep | Clouds | ACI | Air-Sea | Dev't/Val | Met |
|-------------|-------------------------------|-----|---------|---------|--------|-----|---------|-----------|-----|
| DISCOVER-AQ | Anderson et al. (2014)        | x   |         |         |        |     |         |           |     |
| DISCOVER-AQ | Beyersdorf et al. (2016)      |     | x       |         |        |     |         |           |     |
| DISCOVER-AQ | Brent et al. (2015)           | x   |         |         |        |     |         | x         |     |
| DISCOVER-AQ | Cheng et al. (2017)           | x   |         |         |        |     |         |           |     |
| DISCOVER-AQ | Cheng et al. (2018)           | x   |         |         |        |     |         | x         |     |
| DISCOVER-AQ | Chu et al. (2015)             |     | x       |         |        |     |         | x         |     |
| DISCOVER-AQ | Compton et al. (2013)         |     |         |         |        |     |         |           | x   |
| DISCOVER-AQ | Crumeyrolle et al. (2014)     |     | x       |         |        |     |         |           |     |
| DISCOVER-AQ | Follette-Cook et al. (2015)   | x   |         |         |        |     |         | x         |     |
| DISCOVER-AQ | Garner et al. (2015)          | x   |         |         |        |     |         | x         |     |
| DISCOVER-AQ | Goldberg et al. (2014)        | x   |         |         |        |     |         | x         |     |
| DISCOVER-AQ | Halliday et al. (2015)        | x   |         |         |        |     |         |           |     |
| DISCOVER-AQ | He et al. (2014)              | x   |         |         |        |     |         |           |     |
| DISCOVER-AQ | Hegarty et al. (2018)         |     |         |         |        |     |         | x         | x   |
| DISCOVER-AQ | Knepp et al. (2015)           | x   |         |         |        |     |         | x         |     |
| DISCOVER-AQ | Lee et al. (2018)             | x   | x       |         |        |     |         |           |     |
| DISCOVER-AQ | Li et al. (2017)              | x   |         |         |        |     |         |           |     |
| DISCOVER-AQ | Martins et al. (2015)         | x   |         |         |        |     |         | x         |     |
| DISCOVER-AQ | Mazzuca et al. (2017)         | x   |         |         |        |     |         |           |     |
| DISCOVER-AQ | Munchak et al. (2013)         |     | x       |         |        |     |         | x         |     |
| DISCOVER-AQ | Reed et al. (2015)            | x   | x       |         |        |     |         | x         |     |
| DISCOVER-AQ | Sawamura et al. (2014)        |     | x       |         |        |     |         | x         |     |
| DISCOVER-AQ | Simon et al. (2018)           | x   |         |         |        |     |         | x         |     |
| DISCOVER-AQ | Thompson et al. (2015)        | x   |         |         |        |     |         |           |     |
| DISCOVER-AQ | Tzortziou et al. (2015)       | x   |         |         |        |     |         |           |     |
| DISCOVER-AQ | Zhang et al. (2016)           | x   |         |         |        |     |         | x         |     |
| DISCOVER-AQ | Ziemba et al. (2013)          |     | x       |         |        |     |         | x         |     |
| EMEFS       | MacDonald et al. (1993)       | x   |         |         |        |     |         | x         |     |
| EMEFS       | McNaughton and Vet (1996)     | x   | x       | x       |        |     |         |           |     |
| EOPACE      | Reid et al. (2001)            |     | x       |         |        |     |         |           |     |
| EOPACE      | Zielinski and Piskozub (2005) |     | x       |         |        |     |         |           |     |
| ERICA       | Hadlock and Kreitzberg (1988) |     |         |         |        | x   |         |           | x   |
| ERICA       | Lackmann et al. (1997)        |     |         |         |        |     |         |           | x   |
| ERICA       | Lackmann et al. (1999)        |     |         |         |        |     |         |           | x   |
| ERICA       | Neiman and Shapiro (1993)     |     |         |         |        | x   | x       |           | x   |
| ERICA       | Neiman et al. (1993)          |     |         |         |        | x   | x       |           | x   |
| ERICA       | Schultz et al. (1998)         |     |         |         |        | x   | x       |           | x   |
| FAMS        | Gill et al. (1995)            | x   |         |         |        |     |         |           |     |
| FAMS        | Guentzel et al. (1998)        |     | x       | x       |        |     |         |           |     |
| FAMS        | Guentzel et al. (2001)        |     | x       | x       |        |     |         |           |     |
| FAMS        | Landing et al. (1995)         |     |         | x       |        |     |         |           |     |
| FAMS        | Landing et al. (1998)         |     | x       | x       |        |     |         | x         |     |
| FAMS        | Pai et al. (1997)             | x   | x       | x       |        |     |         | x         |     |
| FAMS        | Pollman et al. (1995)         | x   | x       | x       |        |     |         |           |     |
| FAMS        | Prospero and Landing (2009)   |     | x       | x       |        |     |         |           |     |
| FAMS        | Prospero et al. (2010)        |     | x       | x       |        |     |         |           |     |
| FASINEX     | Charnock and Businger (1991)  |     |         |         |        | x   | x       |           | x   |
| FASINEX     | Stage and Weller (1985)       |     |         |         |        | x   | x       |           | x   |
| FASINEX     | Stage and Weller (1986)       |     |         |         |        | x   | x       |           | x   |
| FASINEX     | Weller (1991)                 |     |         |         |        | x   | x       |           | x   |

| Campaign       | Reference                     | Gas | Aerosol | Wet Dep | Clouds | ACI | Air-Sea | Dev't/Val | Met |
|----------------|-------------------------------|-----|---------|---------|--------|-----|---------|-----------|-----|
| FASINEX        | Weller et al. (1995)          |     |         |         | x      |     | x       |           | x   |
| GALE           | Bane and Osgood (1989)        |     |         |         |        |     | x       |           | x   |
| GALE           | Blanton et al. (1989)         |     |         |         |        |     | x       |           | x   |
| GALE           | Boers et al. (1991)           |     |         |         | x      |     | x       | x         | x   |
| GALE           | Chang and Holt (1994)         |     |         |         | x      |     |         | x         | x   |
| GALE           | Chou and Ferguson (1991)      |     |         |         | x      |     | x       |           | x   |
| GALE           | Davis et al. (1991)           |     |         |         |        |     | x       |           | x   |
| GALE           | Dirks et al. (1988)           |     |         |         | x      |     | x       |           | x   |
| GALE           | Grossman and Betts (1990)     |     |         |         | x      |     | x       |           | x   |
| GALE           | Guishard et al. (1991)        |     |         |         | x      |     | x       |           | x   |
| GALE           | Huang and Raman (1991)        |     |         |         | x      |     | x       | x         | x   |
| GALE           | Huang and Raman (1992)        |     |         |         | x      |     | x       | x         | x   |
| GALE           | Raman and Riordan (1988)      |     |         |         | x      |     | x       |           | x   |
| GALE           | Vukovich et al. (1991)        |     |         |         | x      |     | x       |           | x   |
| GALE           | Wayland and Raman (1989)      |     |         |         | x      |     | x       |           | x   |
| GCE/CASE/WATOX | Bardwell et al. (1990)        | x   | x       |         |        |     |         | x         |     |
| GCE/CASE/WATOX | Church et al. (1990)          |     | x       | x       |        |     |         |           |     |
| GCE/CASE/WATOX | Gallagher et al. (1990)       | x   |         |         |        |     |         |           |     |
| GCE/CASE/WATOX | Galloway et al. (1990)        | x   | x       | x       |        |     |         |           |     |
| GCE/CASE/WATOX | Gorzelska and Galloway (1990) |     | x       | x       |        |     |         |           |     |
| GCE/CASE/WATOX | Hansen et al. (1990)          |     | x       |         |        |     |         |           |     |
| GCE/CASE/WATOX | Hastie et al. (1990)          | x   | x       |         |        |     |         |           |     |
| GCE/CASE/WATOX | Hitchcock et al. (1990)       |     |         | x       |        |     | x       |           |     |
| GCE/CASE/WATOX | Keene et al. (1990)           | x   | x       |         |        |     |         |           |     |
| GCE/CASE/WATOX | Kim et al. (1990)             |     | x       |         |        |     |         |           |     |
| GCE/CASE/WATOX | Kopcewica et al. (1991)       |     | x       |         |        |     |         |           |     |
| GCE/CASE/WATOX | Luria and Sievering (1991)    | x   |         |         |        |     |         | x         |     |
| GCE/CASE/WATOX | Luria et al. (1990)           | x   |         |         |        |     |         |           |     |
| GCE/CASE/WATOX | Piotrowicz et al. (1990)      | x   |         |         |        |     |         |           |     |
| GCE/CASE/WATOX | Pszenny et al. (1990a)        | x   | x       | x       |        |     | x       |           |     |
| GCE/CASE/WATOX | Pszenny et al. (1990b)        | x   | x       | x       |        |     |         |           |     |
| GCE/CASE/WATOX | Ray et al. (1990a)            | x   |         |         |        |     |         |           |     |
| GCE/CASE/WATOX | Ray et al. (1990b)            | x   |         |         |        |     |         |           |     |
| GCE/CASE/WATOX | Reddy et al. (1990)           |     | x       |         |        |     |         |           |     |
| GCE/CASE/WATOX | Sievering et al. (1990)       |     | x       |         |        |     |         |           |     |
| GCE/CASE/WATOX | Sievering et al. (1991)       | x   | x       |         |        |     |         |           |     |
| GCE/CASE/WATOX | Stunder et al. (1990)         |     |         |         |        |     |         |           | x   |
| GCE/CASE/WATOX | Whelpdale et al. (1990)       | x   | x       |         |        |     |         |           |     |
| GOMECC         | Helmig et al. (2012)          | x   |         |         |        |     | x       |           |     |
| GOMECC         | Hu et al. (2010)              | x   |         |         |        |     | x       |           |     |
| GOMECC         | Liu et al. (2011)             | x   |         |         |        |     | x       |           |     |
| GPCP           | Galloway et al. (1983)        |     |         | x       |        |     |         |           |     |
| IAGOS          | Berkes et al. (2017)          |     |         |         |        |     |         |           | x   |
| IAGOS          | Cohen et al. (2018)           | x   |         |         |        |     |         |           |     |
| IAGOS          | Fischbeck et al. (2017)       | x   |         |         |        |     |         |           |     |
| IAGOS          | Gaudel et al. (2018)          | x   |         |         |        |     |         | x         |     |
| IAGOS          | Gressent et al. (2014)        | x   |         |         |        |     |         |           |     |
| IAGOS          | Heintzenberg et al. (2011)    |     | x       |         |        |     |         |           |     |
| IAGOS          | Hermann et al. (2008)         |     | x       |         |        |     |         |           |     |
| IAGOS          | Marengo et al. (1998)         | x   |         |         |        |     |         |           |     |
| IAGOS          | Petetin et al. (2018)         | x   |         |         |        |     |         |           |     |
| IAGOS          | Petzold et al. (2015)         | x   | x       |         |        |     |         |           |     |
| IAGOS          | Petzold et al. (2017)         |     |         |         | x      |     |         |           |     |

| Campaign | Reference                | Gas | Aerosol | Wet Dep | Clouds | ACI | Air-Sea | Dev't/Val | Met |
|----------|--------------------------|-----|---------|---------|--------|-----|---------|-----------|-----|
| IAGOS    | Slemr et al. (2018)      | x   |         |         |        |     |         |           |     |
| IAGOS    | Stratmann et al. (2016)  | x   |         |         |        |     |         |           |     |
| IAGOS    | Trickl et al. (2003)     | x   |         |         |        |     |         |           |     |
| IAGOS    | Weigelt et al. (2009)    |     |         |         |        | x   |         |           |     |
| IAGOS    | Wisher et al. (2014)     | x   |         |         |        |     |         |           |     |
| ICARTT   | Ambrose et al. (2007)    | x   |         |         |        |     |         |           |     |
| ICARTT   | Angevine et al. (2006)   |     |         |         |        |     |         |           | x   |
| ICARTT   | Avey et al. (2007)       |     |         |         |        | x   |         |           |     |
| ICARTT   | Bahadur et al. (2010)    |     | x       |         |        |     |         |           |     |
| ICARTT   | Bates et al. (2006)      |     | x       |         |        |     |         | x         |     |
| ICARTT   | Brown et al. (2005)      | x   |         |         |        |     |         |           |     |
| ICARTT   | Brown et al. (2006a)     | x   | x       |         |        |     |         |           |     |
| ICARTT   | Brown et al. (2006b)     | x   |         |         |        |     |         |           |     |
| ICARTT   | Cain et al. (2012)       | x   |         |         |        |     |         | x         |     |
| ICARTT   | Chen et al. (2006)       | x   | x       | x       |        |     |         | x         |     |
| ICARTT   | Clarke et al. (2007)     |     | x       |         |        |     |         |           |     |
| ICARTT   | Cook et al. (2007)       | x   | x       |         |        |     |         | x         |     |
| ICARTT   | Davis et al. (2014)      | x   |         |         |        |     |         |           |     |
| ICARTT   | de Gouw et al. (2006)    | x   | x       |         |        | x   |         |           |     |
| ICARTT   | Drury et al. (2010)      |     | x       |         |        |     |         | x         |     |
| ICARTT   | Fairall et al. (2006)    |     |         |         |        | x   |         |           | x   |
| ICARTT   | Fehsenfeld et al. (2006) | x   | x       |         |        |     |         |           |     |
| ICARTT   | Fischer et al. (2006)    | x   | x       |         |        |     |         |           |     |
| ICARTT   | Fried et al. (2008)      |     | x       |         |        |     |         | x         |     |
| ICARTT   | Frost et al. (2006)      | x   |         |         |        |     |         |           |     |
| ICARTT   | Fuehlberg et al. (2007)  |     |         |         |        |     |         |           | x   |
| ICARTT   | Garrett et al. (2006)    | x   | x       |         |        | x   |         |           |     |
| ICARTT   | Gilardoni et al. (2007)  |     | x       |         |        |     |         |           |     |
| ICARTT   | Griffin et al. (2007)    | x   |         |         |        |     |         |           |     |
| ICARTT   | Heald et al. (2006)      |     | x       |         |        |     |         | x         |     |
| ICARTT   | Herndon et al. (2007)    | x   |         |         |        |     |         | x         |     |
| ICARTT   | Hudman et al. (2007)     | x   |         |         |        |     |         | x         |     |
| ICARTT   | Hudman et al. (2008)     | x   |         |         |        |     |         | x         |     |
| ICARTT   | Jimenez et al. (2005)    | x   |         |         |        |     |         | x         |     |
| ICARTT   | Keene et al. (2007b)     | x   | x       |         |        |     |         |           |     |
| ICARTT   | Kim et al. (2008)        | x   |         |         |        |     |         |           |     |
| ICARTT   | Lee et al. (2011)        | x   |         |         |        |     |         | x         |     |
| ICARTT   | Lewis et al. (2007)      | x   | x       |         |        |     |         |           |     |
| ICARTT   | Mao et al. (2006)        | x   |         |         |        |     |         |           |     |
| ICARTT   | Martin et al. (2006)     | x   |         |         |        |     |         | x         |     |
| ICARTT   | McKeen et al. (2005)     | x   |         |         |        |     |         | x         |     |
| ICARTT   | McKeen et al. (2007)     |     | x       |         |        |     |         | x         |     |
| ICARTT   | Medina et al. (2007)     |     | x       |         |        | x   |         |           |     |
| ICARTT   | Methven et al. (2006)    | x   |         |         |        |     |         | x         |     |
| ICARTT   | Millet et al. (2006)     | x   | x       |         |        |     |         |           |     |
| ICARTT   | Murphy et al. (2006)     |     | x       |         |        |     |         |           |     |
| ICARTT   | Neuman et al. (2006)     | x   |         |         |        |     |         |           |     |
| ICARTT   | Nowak et al. (2007)      | x   |         |         |        |     |         | x         |     |
| ICARTT   | Osthoff et al. (2006a)   | x   |         |         |        |     |         |           |     |
| ICARTT   | Osthoff et al. (2006b)   | x   |         |         |        |     |         | x         |     |

| Campaign            | Reference                    | Gas | Aerosol | Wet Dep | Clouds | ACI | Air-Sea | Dev't/Val | Met |
|---------------------|------------------------------|-----|---------|---------|--------|-----|---------|-----------|-----|
| ICARTT              | Pagowski and Grell (2006)    | x   |         |         |        |     |         | x         |     |
| ICARTT              | Pagowski et al. (2005)       | x   |         |         |        |     |         | x         |     |
| ICARTT              | Pechtl and von Glasow (2007) | x   |         |         |        |     |         |           |     |
| ICARTT              | Peltier et al. (2007)        |     | x       |         |        |     |         |           |     |
| ICARTT              | Pikelnaya et al. (2007)      | x   |         |         |        |     |         | x         |     |
| ICARTT              | Pszenny et al. (2007)        | x   |         |         |        |     |         |           |     |
| ICARTT              | Quinn et al. (2006)          |     | x       |         |        |     |         |           |     |
| ICARTT              | Real et al. (2007)           | x   |         |         |        |     |         | x         |     |
| ICARTT              | Reeves et al. (2007)         | x   |         |         |        |     |         | x         |     |
| ICARTT              | Riddle et al. (2006)         |     |         |         |        |     |         | x         | x   |
| ICARTT              | Russell et al. (2007)        |     | x       |         |        |     |         |           |     |
| ICARTT              | Sierau et al. (2006)         |     | x       |         |        |     |         |           |     |
| ICARTT              | Singh et al. (2006)          | x   | x       |         |        |     |         |           |     |
| ICARTT              | Sinreich et al. (2007)       | x   |         |         |        |     |         | x         |     |
| ICARTT              | Sive et al. (2005)           | x   |         |         |        |     |         | x         |     |
| ICARTT              | Smith et al. (2007)          | x   | x       |         |        |     |         |           |     |
| ICARTT              | Snow et al. (2007)           | x   |         |         |        |     |         |           |     |
| ICARTT              | Sommariva et al. (2011)      | x   |         |         |        |     |         | x         |     |
| ICARTT              | Stutz et al. (2007)          | x   |         |         |        |     |         |           |     |
| ICARTT              | Sullivan et al. (2006)       |     | x       |         |        |     |         | x         |     |
| ICARTT              | Thompson et al. (2007a)      | x   |         |         |        |     |         |           |     |
| ICARTT              | Thompson et al. (2007b)      | x   |         |         |        |     |         |           |     |
| ICARTT              | Thornhill et al. (2008)      |     | x       |         |        |     |         |           |     |
| ICARTT              | Vandemark et al. (2016)      |     | x       |         |        |     |         |           |     |
| ICARTT              | Warneke et al. (2005)        | x   |         |         |        |     |         | x         |     |
| ICARTT              | Warneke et al. (2006)        | x   |         |         |        |     |         | x         |     |
| ICARTT              | White et al. (2006)          |     |         |         |        |     |         | x         | x   |
| ICARTT              | White et al. (2008)          | x   |         |         |        |     |         |           |     |
| ICARTT              | Wilczak et al. (2006)        |     |         |         |        |     |         | x         |     |
| ICARTT              | Williams et al. (2006a)      |     | x       |         |        |     |         | x         |     |
| ICARTT              | Williams et al. (2006b)      | x   |         |         |        |     |         | x         |     |
| ICARTT              | Williams et al. (2007)       |     | x       |         |        |     |         |           |     |
| ICARTT              | Wolfe et al. (2007)          |     |         |         |        |     |         |           | x   |
| ICARTT              | Yu et al. (2007)             | x   |         |         |        |     |         | x         | x   |
| ICARTT              | Yu et al. (2010)             | x   |         |         |        |     |         | x         |     |
| ICARTT              | Ziemba et al. (2007)         |     | x       |         |        |     |         |           |     |
| ICARTT/NEAQS 2002   | Parrish et al. (2007)        | x   |         |         |        |     |         | x         |     |
| ICARTT/NEAQS 2002   | White et al. (2007)          | x   |         |         |        |     |         |           | x   |
| ICEALOT             | Frossard et al. (2011)       |     | x       |         |        |     |         |           |     |
| ICEALOT             | Lapina et al. (2011)         |     | x       |         |        |     |         | x         |     |
| ICEALOT             | Russell et al. (2010)        |     | x       |         |        |     |         |           |     |
| ICEALOT/WACS/NAAMES | Quinn et al. (2017)          |     | x       |         |        |     |         |           |     |
| MASEX               | Bechtold et al. (1992)       |     |         |         | x      |     | x       | x         | x   |
| MASEX               | Boers and Melfi (1987)       |     |         |         | x      |     | x       | x         | x   |
| MASEX               | Melfi et al. (1985)          |     |         |         | x      |     |         | x         | x   |
| MASEX               | Raasch (1990)                |     |         |         | x      |     |         | x         | x   |
| Misc                | Alliss and Raman (1995a)     |     |         |         | x      |     |         |           | x   |
| Misc                | Alliss and Raman (1995b)     |     |         |         | x      |     |         |           | x   |
| Misc                | Appenzeller et al. (2000)    | x   |         |         |        |     |         |           | x   |
| Misc                | Atlas et al. (1983)          |     |         |         | x      |     |         |           |     |

| Campaign | Reference                           | Gas | Aerosol | Wet Dep | Clouds | ACI | Air-Sea | Dev't/Val | Met |
|----------|-------------------------------------|-----|---------|---------|--------|-----|---------|-----------|-----|
| Misc     | Babin et al. (2003)                 |     |         |         | x      |     |         |           |     |
| Misc     | Baker et al. (2017)                 |     | x       |         |        |     |         | x         |     |
| Misc     | Beattie and Whelpdale (1989)        |     |         | x       |        |     |         |           | x   |
| Misc     | Beaupré et al. (2019)               |     | x       |         |        |     | x       |           |     |
| Misc     | Benitez-Nelson and Buesseler (1999) |     |         | x       |        |     |         |           |     |
| Misc     | Bernhardt and DeGaetano (2012)      |     |         |         | x      |     |         |           |     |
| Misc     | Berresheim et al. (1991)            | x   | x       | x       |        |     |         |           |     |
| Misc     | Booth et al. (2012)                 |     |         |         |        | x   |         |           |     |
| Misc     | Bosart (1981)                       |     |         |         | x      |     |         |           |     |
| Misc     | Brennan and Lackmann (2005)         |     |         |         | x      |     |         |           |     |
| Misc     | Brice et al. (1988)                 | x   |         |         |        |     |         |           |     |
| Misc     | Bulgin et al. (2008)                |     |         |         |        | x   |         |           |     |
| Misc     | Bunker (1976)                       |     |         |         |        |     | x       |           | x   |
| Misc     | Bunker and Worthington (1976)       |     |         |         |        |     | x       |           | x   |
| Misc     | Businger (1995)                     |     |         |         |        |     |         |           | x   |
| Misc     | Carson (1950)                       |     |         |         | x      |     | x       |           | x   |
| Misc     | Cervený and Balling (1998)          |     |         |         |        | x   |         |           |     |
| Misc     | Charles and Colle (2009a)           |     |         |         | x      |     |         | x         |     |
| Misc     | Charles and Colle (2009b)           |     |         |         | x      |     |         | x         |     |
| Misc     | Chelton et al. (2004)               |     |         |         |        |     | x       |           |     |
| Misc     | Chou and Atlas (1982)               |     |         |         | x      |     | x       |           | x   |
| Misc     | Christoudias et al. (2012)          | x   |         |         |        |     |         |           | x   |
| Misc     | Church et al. (1991)                | x   | x       | x       |        |     |         |           |     |
| Misc     | Cione et al. (1993)                 |     |         |         | x      |     | x       |           | x   |
| Misc     | Cogbill and Likens (1974)           |     |         | x       |        |     |         |           |     |
| Misc     | Colarco et al. (2014)               |     | x       |         |        |     |         |           |     |
| Misc     | Cooper et al. (1987)                | x   |         |         |        |     |         |           |     |
| Misc     | Creilson et al. (2003)              | x   |         |         |        |     |         |           | x   |
| Misc     | Crespo and Posselt (2016)           |     |         |         | x      |     |         |           | x   |
| Misc     | DeGaetano et al. (2002)             |     |         |         | x      |     |         |           |     |
| Misc     | De Mello et al. (1987)              | x   |         |         |        |     |         |           |     |
| Misc     | Dreessen et al. (2019)              | x   |         |         |        |     |         |           |     |
| Misc     | Driscoll et al. (2001)              | x   | x       | x       |        |     |         |           |     |
| Misc     | Eckhardt et al. (2003)              | x   |         |         |        |     |         |           | x   |
| Misc     | Engstrom et al. (2015)              |     |         |         |        | x   |         |           |     |
| Misc     | Evans and Jurewicz (2009)           |     |         |         | x      |     |         |           |     |
| Misc     | Feng et al. (2019)                  |     | x       | x       |        |     |         |           |     |
| Misc     | Fitzgerald et al. (1998)            |     | x       |         |        |     |         | x         |     |
| Misc     | Fletcher et al. (2016a)             |     |         |         | x      |     | x       |           | x   |
| Misc     | Fletcher et al. (2016b)             |     |         |         | x      |     | x       |           | x   |
| Misc     | Frossard et al. (2019a)             |     | x       |         |        |     | x       |           |     |
| Misc     | Frossard et al. (2019b)             |     | x       |         |        |     | x       |           |     |
| Misc     | Gall and Johnson (1971)             |     |         |         |        |     | x       |           | x   |
| Misc     | Galloway et al. (1976)              |     |         | x       |        |     |         |           |     |
| Misc     | Ganetis and Colle (2015)            |     |         |         | x      |     |         |           |     |
| Misc     | Ganguly et al. (2009)               |     | x       |         |        |     |         | x         |     |
| Misc     | Geerts and Hobbs (1991)             |     |         |         | x      |     |         | x         |     |
| Misc     | Gettelman and Sherwood (2016)       |     |         |         |        | x   |         |           |     |
| Misc     | Greybush et al. (2017)              |     |         |         |        | x   |         | x         |     |
| Misc     | Griffin et al. (2014)               |     |         |         | x      |     |         | x         |     |

| Campaign | Reference                    | Gas | Aerosol | Wet Dep | Clouds | ACI | Air-Sea | Dev't/Val | Met |
|----------|------------------------------|-----|---------|---------|--------|-----|---------|-----------|-----|
| Misc     | Hall and Booth (2017)        |     |         |         | x      |     | x       | x         | x   |
| Misc     | Harriss et al. (1984)        | x   | x       |         |        |     |         | x         |     |
| Misc     | Hegarty et al. (2010)        | x   |         |         |        |     |         |           |     |
| Misc     | Hirsch et al. (2001)         |     |         |         | x      |     |         |           |     |
| Misc     | Hoppel et al. (1984)         |     | x       |         |        |     |         |           |     |
| Misc     | Hoppel et al. (1985)         |     | x       |         |        |     |         |           |     |
| Misc     | Hurrell 1995                 |     |         |         |        |     |         |           | x   |
| Misc     | Husar et al. (1981)          |     | x       |         |        |     |         |           |     |
| Misc     | Husar et al. (1997)          |     | x       |         |        |     |         | x         |     |
| Misc     | Ichiye and Zipser (1967)     |     |         |         |        |     | x       |           | x   |
| Misc     | Ignatov et al. (1995)        |     | x       |         |        |     |         | x         |     |
| Misc     | Jones et al. (2009)          |     |         |         |        | x   |         |           |     |
| Misc     | Jongeward et al. (2016)      |     | x       |         |        |     |         |           |     |
| Misc     | Jordan et al. (2000)         | x   | x       | x       |        |     |         |           |     |
| Misc     | Kacenelenbogen et al. (2011) |     | x       |         |        |     |         | x         |     |
| Misc     | Kaufman et al. (2005)        |     |         |         |        | x   |         |           |     |
| Misc     | Keene et al. (1993)          | x   |         |         |        |     |         | x         |     |
| Misc     | Keene et al. (2002b)         |     |         | x       |        |     |         | x         |     |
| Misc     | Keim et al. (2005)           |     | x       |         |        |     |         |           | x   |
| Misc     | Kelleher and Feder (1978)    | x   | x       |         |        |     |         | x         |     |
| Misc     | Kessner et al. (2013)        |     | x       |         |        |     |         | x         |     |
| Misc     | Kieber et al. (1999)         |     |         | x       |        |     |         |           |     |
| Misc     | Krabbenhoft et al. (1998)    | x   | x       |         |        |     | x       |           |     |
| Misc     | Kumjian and Lombardo (2017)  |     |         |         | x      |     |         | x         |     |
| Misc     | Leibensperger et al. (2012a) |     | x       |         |        |     |         |           |     |
| Misc     | Leibensperger et al. (2012b) |     | x       |         |        |     |         |           |     |
| Misc     | Lewis et al. (2010)          |     | x       |         |        |     |         | x         |     |
| Misc     | Li et al. (2002)             | x   |         |         |        |     |         |           |     |
| Misc     | Li et al. (2004a)            |     |         |         | x      |     | x       |           |     |
| Misc     | Li et al. (2005)             | x   | x       |         |        |     |         | x         |     |
| Misc     | Likens and Bormann (1974)    |     |         | x       |        |     |         |           |     |
| Misc     | Likens et al. (1972)         |     |         | x       |        |     |         |           |     |
| Misc     | Lindner and Frysinger (2007) |     |         | x       |        |     |         |           |     |
| Misc     | Liu et al. (2001)            | x   | x       |         |        |     |         | x         |     |
| Misc     | Liu et al. (2004)            |     |         |         | x      |     | x       |           |     |
| Misc     | Lombardo et al. (2015)       |     |         |         | x      |     |         | x         |     |
| Misc     | Long et al. (2009)           |     |         |         | x      |     |         | x         | x   |
| Misc     | Loughner et al. (2016)       |     | x       |         |        |     |         |           |     |
| Misc     | Luan and Jaegle (2013)       |     | x       |         |        |     |         |           | x   |
| Misc     | Lukashin et al. (2000)       |     | x       |         |        |     |         |           |     |
| Misc     | Martin et al. (1990)         |     |         |         | x      |     |         |           |     |
| Misc     | McPherson et al. (2010)      |     | x       |         |        |     |         | x         |     |
| Misc     | Meskhidze et al. (2019)      |     | x       |         |        |     |         |           |     |
| Misc     | Mesias et al. (2007)         |     |         |         |        |     |         |           | x   |
| Misc     | Miller (1946)                |     |         |         | x      |     |         | x         | x   |
| Misc     | Molthan et al. (2016)        |     |         |         | x      |     |         | x         |     |
| Misc     | Moore et al. (2013)          |     |         |         |        | x   |         |           |     |
| Misc     | Muhs et al. (2007)           |     | x       | x       |        |     |         |           |     |
| Misc     | Mullaugh et al. (2014)       |     |         | x       |        |     |         |           |     |
| Misc     | Nicosia and Grumm (1999)     |     |         |         | x      |     |         | x         |     |
| Misc     | Novak and Colle (2012)       |     |         |         | x      |     |         | x         |     |
| Misc     | Novak et al. (2004)          |     |         |         | x      |     |         |           |     |

| Campaign | Reference                    | Gas | Aerosol | Wet Dep | Clouds | ACI | Air-Sea | Dev't/Val | Met |
|----------|------------------------------|-----|---------|---------|--------|-----|---------|-----------|-----|
| Misc     | Novak et al. (2006)          |     |         |         | x      |     |         | x         |     |
| Misc     | Novak et al. (2008)          |     |         |         | x      |     |         | x         |     |
| Misc     | Novak et al. (2010)          |     |         |         | x      |     |         |           |     |
| Misc     | Orton et al. (2016)          |     |         |         | x      |     |         |           |     |
| Misc     | Painemal et al. (2019)       |     | x       |         |        |     |         | x         |     |
| Misc     | Park and Leovy (2004)        |     |         |         | x      |     | x       |           | x   |
| Misc     | Peyridieu et al. (2010)      |     | x       |         |        |     |         | x         |     |
| Misc     | Phillips et al. (2018)       |     | x       |         |        |     |         |           |     |
| Misc     | Picca et al. (2014)          |     |         |         | x      |     |         | x         |     |
| Misc     | Plant et al. (2019)          | x   |         |         |        |     |         |           |     |
| Misc     | Powell et al. (2009)         |     | x       |         |        |     |         | x         |     |
| Misc     | Pringle et al. (2010)        |     | x       |         |        |     |         |           |     |
| Misc     | Prospero (1999)              |     | x       | x       |        |     |         |           |     |
| Misc     | Prospero and Carlson (1971)  |     | x       |         |        |     |         |           |     |
| Misc     | Prospero et al. (1987)       |     |         | x       |        |     |         |           |     |
| Misc     | Prospero et al. (2001)       |     | x       |         |        |     |         |           |     |
| Misc     | Pszenny et al. (1993)        | x   |         |         |        |     |         |           |     |
| Misc     | Raymond (2005)               |     |         | x       |        |     |         |           |     |
| Misc     | Reed et al. (1992)           |     |         |         | x      |     |         |           |     |
| Misc     | Richter et al. (1983)        |     |         | x       |        |     |         |           |     |
| Misc     | Robson et al. (2018)         | x   | x       |         |        |     |         |           | x   |
| Misc     | Rogers et al. (2011)         |     | x       |         |        |     |         | x         |     |
| Misc     | Rogers et al. (2014)         |     | x       |         |        |     |         | x         |     |
| Misc     | Rogers et al. (2019)         | x   | x       |         |        |     |         |           |     |
| Misc     | Root et al. (2007)           |     |         |         | x      |     |         | x         |     |
| Misc     | Russell et al. (2003)        | x   | x       |         |        |     |         |           |     |
| Misc     | Sanders (1986)               |     |         |         | x      |     |         |           |     |
| Misc     | Sanders and Bosart (1985)    |     |         |         | x      |     |         |           |     |
| Misc     | Sanders and Gyakum (1980)    |     |         |         | x      |     |         | x         |     |
| Misc     | Savoie and Prospero (1977)   |     | x       |         |        |     |         |           |     |
| Misc     | Savoie et al. (1987)         | x   |         |         |        |     |         |           |     |
| Misc     | Scott et al. (2003)          |     |         |         | x      |     |         |           |     |
| Misc     | Scudlark et al. (1998)       |     |         | x       |        |     |         | x         |     |
| Misc     | Serra et al. (2014)          |     | x       |         |        |     |         |           | x   |
| Misc     | Sethuraman et al. (1986)     |     |         |         |        |     | x       |           | x   |
| Misc     | Sharma et al. (1999)         | x   |         |         |        |     | x       | x         |     |
| Misc     | Siddique et al. (2015)       |     |         |         | x      |     |         | x         |     |
| Misc     | Sienkiewicz et al. (1989)    |     |         |         | x      |     |         |           |     |
| Misc     | Smith et al. (2001)          | x   |         |         |        |     |         |           |     |
| Misc     | Song et al. (2011)           | x   |         |         |        |     |         |           |     |
| Misc     | Spicer (1982)                | x   |         |         |        |     |         |           |     |
| Misc     | Stauffer and Thompson (2015) | x   |         |         |        |     |         |           | x   |
| Misc     | Sublette et al. (1996)       |     |         |         |        |     | x       |           |     |
| Misc     | Sweet et al. (1981)          |     |         |         |        |     | x       |           | x   |
| Misc     | Trapp et al. (2010)          |     | x       |         |        |     |         |           |     |
| Misc     | Uccellini et al. (1987)      |     |         |         | x      |     |         |           |     |
| Misc     | Warnecke et al. (1971)       |     |         |         |        |     | x       |           |     |
| Misc     | Wedam et al. (2009)          |     |         |         |        |     |         |           | x   |
| Misc     | Wei et al. (2018)            |     |         |         | x      |     | x       |           | x   |
| Misc     | Woods and Osborn (2001)      |     | x       |         |        |     |         |           |     |
| Misc     | Yoon et al. (2014)           |     | x       |         |        |     |         | x         |     |
| Misc     | Young and Sikora (2003)      |     |         |         | x      |     |         |           |     |
| Misc     | Yu et al. (2004)             |     |         |         |        |     | x       | x         |     |
| Misc     | Zamora et al. (2013)         |     | x       | x       |        |     |         |           |     |
| Misc     | Zeller et al. (1977)         | x   |         |         |        |     |         |           | x   |



| Campaign         | Reference                    | Gas | Aerosol | Wet Dep | Clouds | ACI | Air-Sea | Dev't/Val | Met |
|------------------|------------------------------|-----|---------|---------|--------|-----|---------|-----------|-----|
| Misc             | Zhang et al. (2002)          |     |         |         | x      |     |         | x         |     |
| Misc             | Zhang et al. (2019)          |     | x       |         |        |     |         |           |     |
| Misc             | Zhao et al. (2008)           |     | x       |         |        |     |         | x         |     |
| Misc             | Zhu and Kieber (2019)        |     |         |         |        |     | x       |           |     |
| Misc             | Zhu et al. (2019)            | x   |         |         |        |     |         |           |     |
| Misc             | Zuidema et al. (2019)        |     | x       |         |        |     |         |           |     |
| NAAMES           | Behrenfeld et al. (2019)     | x   | x       |         |        | x   | x       |           |     |
| NAAMES           | Sanchez et al. (2018)        |     | x       |         |        | x   |         |           |     |
| NARE             | Angevine et al. (1996)       |     |         |         |        |     |         |           | x   |
| NARE             | Audiffren et al. (2004)      | x   | x       |         |        | x   |         |           |     |
| NARE             | Banic et al. (1996)          | x   | x       |         |        |     |         |           |     |
| NARE             | Berkowitz et al. (1995)      | x   |         |         |        |     |         |           |     |
| NARE             | Buhr et al. (1996)           | x   | x       |         |        |     |         |           |     |
| NARE             | Cooper et al. (2001)         | x   |         |         |        |     |         |           | x   |
| NARE             | Cooper et al. (2002a)        | x   |         |         |        |     |         |           |     |
| NARE             | Cooper et al. (2002b)        | x   |         |         |        |     |         |           |     |
| NARE             | Doran et al. (1996)          | x   |         |         |        |     |         |           | x   |
| NARE             | Fast and Berkowitz (1996)    | x   |         |         |        |     |         | x         | x   |
| NARE             | Fast and Berkowitz (1997)    | x   |         |         |        |     |         | x         | x   |
| NARE             | Fehsenfeld et al. (1996)     | x   | x       |         |        |     |         |           |     |
| NARE             | Fried et al. (2002)          | x   |         |         |        |     |         | x         |     |
| NARE             | Frost et al. (2002)          | x   |         |         |        |     |         | x         |     |
| NARE             | Kleinman et al. (1998)       | x   |         |         |        |     |         | x         |     |
| NARE             | Knapp et al. (1998a)         | x   |         |         |        |     |         |           |     |
| NARE             | Knapp et al. (1998b)         | x   |         |         |        |     |         | x         |     |
| NARE             | Leitch et al. (1996)         |     |         |         |        | x   |         |           |     |
| NARE             | Li et al. (2004b)            | x   |         |         |        |     |         | x         |     |
| NARE             | Lin et al. (1998)            | x   |         |         |        |     |         | x         |     |
| NARE             | McCaffery et al. (2004)      | x   |         |         |        |     |         | x         |     |
| NARE             | Merrill and Moody (1996)     |     |         |         |        |     |         | x         | x   |
| NARE             | Moody et al. (1996)          | x   |         |         |        |     |         |           | x   |
| NARE             | Parrish et al. (1998)        | x   |         |         |        |     |         |           |     |
| NARE             | Parrish et al. (2000)        | x   |         |         |        |     |         |           | x   |
| NARE             | Ray et al. (1996)            | x   |         |         |        |     |         |           |     |
| NARE             | Roberts et al. (1996)        | x   |         |         |        |     |         |           |     |
| NARE             | Roberts et al. (1998)        | x   |         |         |        |     |         |           |     |
| NARE             | Spicer et al. (1996)         | x   |         |         |        |     |         | x         |     |
| NARE             | Stohl et al. (2002)          | x   |         |         |        |     |         |           |     |
| NARE             | Stohl et al. (2004)          |     |         |         |        |     |         | x         |     |
| NARE             | Tanner et al. (1996)         | x   |         |         |        |     |         |           |     |
| NARE             | Wang et al. (1996)           | x   |         |         |        |     |         |           |     |
| NARE             | WeinsteinLloyd et al. (1996) | x   |         |         |        |     |         |           |     |
| NARE             | Wild et al. (1996)           | x   |         |         |        |     |         |           | x   |
| NARE             | Zaucker al al. (1996)        | x   | x       |         |        |     |         |           |     |
| NARSTO-Northeast | Seaman and Michelson (2000)  | x   |         |         |        |     |         |           | x   |
| NARSTO-Northeast | Zhang et al. (1998)          | x   |         |         |        |     |         |           | x   |
| NEAQS 2002       | Aldener et al. (2006)        | x   | x       |         |        |     |         |           |     |
| NEAQS 2002       | Bates et al. (2005)          |     | x       |         |        |     |         |           |     |
| NEAQS 2002       | de Gouw et al. (2003)        | x   |         |         |        |     |         | x         |     |
| NEAQS 2002       | de Gouw et al. (2005)        | x   | x       |         |        |     |         |           | x   |

| Campaign        | Reference                    | Gas | Aerosol | Wet Dep | Clouds | ACI | Air-Sea | Dev't/Val | Met |
|-----------------|------------------------------|-----|---------|---------|--------|-----|---------|-----------|-----|
| NEAQS 2002      | Dibb et al. (2004)           | x   |         |         |        |     |         |           |     |
| NEAQS 2002      | Goldan et al. (2004)         | x   |         |         |        |     |         |           |     |
| NEAQS 2002      | Griffin et al. (2004)        | x   |         |         |        |     |         |           |     |
| NEAQS 2002      | Keene et al. (2004)          | x   | x       |         |        |     |         |           |     |
| NEAQS 2002      | Quinn and Bates (2005)       |     | x       |         |        |     |         |           |     |
| NEAQS 2002      | Stark et al. (2007)          | x   |         |         |        |     |         |           |     |
| NEAQS 2002      | Yu et al. (2006)             | x   |         |         |        |     |         | x         |     |
| NEAQS 2002      | Zhou et al. (2005)           | x   |         |         |        |     |         |           |     |
| NODEM           | Wadleigh (2004)              |     | x       |         |        |     |         |           |     |
| OWLETS          | Dacic et al. (2019)          | x   |         |         |        |     |         | x         |     |
| OWLETS          | Farris et al. (2019)         | x   |         |         |        |     |         | x         |     |
| OWLETS          | Gronoff et al. (2019)        | x   |         |         |        |     |         | x         |     |
| OWLETS          | Sullivan et al. (2019)       | x   | x       |         |        |     |         |           |     |
| RAMMPP          | Chen et al. (2001)           | x   | x       |         |        |     |         |           |     |
| RAMMPP          | Chen et al. (2003)           |     | x       |         |        |     |         |           |     |
| RAMMPP          | Dickerson et al. (1995)      | x   |         |         |        |     |         |           |     |
| RAMMPP          | Hains et al. (2008)          | x   | x       |         |        |     |         | x         |     |
| RAMMPP          | Taubman et al. (2004)        | x   | x       |         |        |     |         |           |     |
| RAMMPP          | Taubman et al. (2006)        | x   | x       |         |        |     |         |           | x   |
| RAMMPP          | Vant-Hull et al. (2005)      | x   |         |         |        |     |         | x         |     |
| SABOR           | Hair et al. (2016)           |     | x       |         |        |     |         | x         |     |
| SABOR           | Ottaviani et al. (2018)      |     |         |         |        |     |         | x         |     |
| SABOR           | Stamnes et al. (2018)        |     | x       |         |        |     |         | x         |     |
| SCAR-A          | Hegg et al. (1995)           |     | x       |         |        |     |         |           |     |
| SCAR-A          | Remer et al. (1997)          |     | x       |         |        |     |         | x         |     |
| SCAR-A/TARFOX   | Soulen et al. (2000)         |     |         |         |        |     |         | x         |     |
| SOLAS           | Leaitch et al. (2010)        |     |         |         |        | x   |         |           |     |
| SONEX/POLINAT 2 | Dibb et al. (2000)           | x   | x       |         |        |     |         |           |     |
| SONEX/POLINAT 2 | Fuehlberg et al. (2000)      |     |         |         |        |     |         |           | x   |
| SONEX/POLINAT 2 | Grant et al. (2000)          | x   |         |         |        |     |         |           | x   |
| SONEX/POLINAT 2 | Jeker et al. (2000)          | x   |         |         |        |     |         |           |     |
| SONEX/POLINAT 2 | Paladino et al. (2000)       |     | x       |         |        |     |         |           |     |
| SONEX/POLINAT 2 | Schlager et al. (1997)       | x   | x       |         |        |     |         |           |     |
| SONEX/POLINAT 2 | Singh et al. (1999)          | x   | x       |         |        |     |         |           |     |
| SONEX/POLINAT 2 | Singh et al. (2000)          | x   |         |         |        |     |         |           |     |
| SONEX/POLINAT 2 | Singh et al. (2002)          | x   | x       |         |        |     |         |           |     |
| SONEX/POLINAT 2 | Thompson et al. (1999)       | x   | x       |         |        |     |         |           |     |
| SONEX/POLINAT 2 | Wang et al. (2000)           |     | x       |         |        |     |         |           |     |
| SURE            | Blumenthal et al. (1984)     | x   | x       |         |        |     |         |           |     |
| SURE            | Perhac (1978)                | x   | x       |         |        |     |         |           |     |
| SURE            | Shreffler and Barnes (1992)  | x   | x       |         |        |     |         |           |     |
| TARFOX          | Bergstrom and Russell (1999) |     | x       |         |        |     |         | x         |     |
| TARFOX          | Durkee et al. (2000)         |     | x       |         |        |     |         |           |     |
| TARFOX          | Ferrare et al. (2000)        | x   | x       |         |        |     |         |           |     |
| TARFOX          | Hartley and Hobbs (2001)     | x   |         |         |        |     |         | x         |     |
| TARFOX          | Hartley et al. (2000)        |     | x       |         |        |     |         | x         |     |
| TARFOX          | Hegg et al. (1997)           |     | x       |         |        |     |         | x         |     |
| TARFOX          | Hignett et al. (1999)        | x   |         |         |        |     |         | x         |     |
| TARFOX          | Hobbs (1999)                 |     | x       |         |        |     |         |           |     |
| TARFOX          | Ismail et al. (2000)         | x   | x       |         |        |     |         | x         |     |
| TARFOX          | Kotchenruther et al. (1999)  |     | x       |         |        |     |         |           |     |

| Campaign | Reference                     | Gas | Aerosol | Wet Dep | Clouds | ACI | Air-Sea | Dev't/Val | Met |
|----------|-------------------------------|-----|---------|---------|--------|-----|---------|-----------|-----|
| TARFOX   | Novakov et al. (1997)         |     | x       |         |        |     |         |           |     |
| TARFOX   | Redemann et al. (2000)        |     | x       |         |        |     |         | x         |     |
| TARFOX   | Remer et al. (1999)           |     | x       |         |        |     |         |           |     |
| TARFOX   | Russell et al. (1999)         |     | x       |         |        |     |         |           |     |
| TARFOX   | Russell et al. (2002)         |     | x       |         |        |     |         | x         |     |
| TARFOX   | Smirnov et al. (2000)         |     | x       |         |        |     |         | x         |     |
| TARFOX   | Tanre et al. (1999)           |     | x       |         |        |     |         | x         |     |
| TARFOX   | Veefkind et al. (1999)        |     | x       |         |        |     |         | x         |     |
| TCAP     | Berg et al. (2016)            |     | x       |         |        |     |         |           |     |
| TCAP     | Fast et al. (2016)            |     | x       |         |        |     |         | x         | x   |
| TCAP     | Kassianov et al. (2012)       |     | x       |         |        |     |         | x         |     |
| TCAP     | Kassianov et al. (2014)       |     | x       |         |        |     |         | x         |     |
| TCAP     | Kassianov et al. (2015)       |     | x       |         |        |     |         | x         |     |
| TCAP     | Kassianov et al. (2018)       |     | x       |         |        |     |         | x         |     |
| TCAP     | Lamer et al. (2014)           |     |         |         | x      |     |         | x         |     |
| TCAP     | Liu and Li (2019)             |     |         |         |        | x   |         |           |     |
| TCAP     | Muller et al. (2014)          |     | x       |         |        |     |         | x         |     |
| TCAP     | Niple et al. (2016)           |     |         |         | x      |     |         | x         |     |
| TCAP     | Shinozuka et al. (2013)       |     | x       |         |        |     |         | x         |     |
| TCAP     | Shinozuka et al. (2015)       |     | x       |         |        |     |         | x         |     |
| TCAP     | Titos et al. (2014)           |     | x       |         |        |     |         |           |     |
| WACS     | Frossard et al. (2014)        |     | x       |         |        |     | x       |           |     |
| WACS     | Kawamura et al. (2017)        |     | x       |         |        |     |         |           |     |
| WACS     | Keene et al. (2017)           |     | x       |         |        |     | x       |           |     |
| WACS     | Kieber et al. (2016)          |     | x       |         |        |     | x       |           |     |
| WACS     | Long et al. (2014)            |     | x       |         |        |     | x       |           |     |
| WACS     | Quinn et al. (2014)           |     | x       |         |        |     |         |           |     |
| WACS II  | Aller et al. (2017)           |     | x       |         |        |     | x       |           |     |
| WATOX    | Artz and Stunder (1987)       |     |         |         |        |     |         |           | x   |
| WATOX    | Boatman et al. (1988)         | x   |         |         |        |     |         | x         |     |
| WATOX    | Bottonheim and Gallant (1987) | x   |         |         |        |     |         |           |     |
| WATOX    | Bridgman and Sievering (1988) |     | x       |         |        |     |         |           |     |
| WATOX    | Bridgman et al. (1988)        | x   | x       |         |        |     |         |           |     |
| WATOX    | Cahill (1988)                 |     | x       |         |        |     |         |           |     |
| WATOX    | Galloway and Whelpdale (1987) | x   | x       |         |        |     |         |           |     |
| WATOX    | Galloway et al. (1988b)       | x   | x       |         |        |     |         |           |     |
| WATOX    | Hansen and Novakov (1988)     |     | x       |         |        |     |         |           |     |
| WATOX    | Hastie et al. (1988a)         | x   | x       |         |        |     |         | x         |     |
| WATOX    | Hastie et al. (1988b)         | x   | x       |         |        |     |         |           |     |
| WATOX    | Heikes et al. (1988)          | x   |         |         |        |     |         |           |     |
| WATOX    | Khalil and Rasmussen (1988)   | x   |         |         |        |     |         |           |     |
| WATOX    | Luke and Dickerson (1987)     | x   |         |         |        |     |         |           |     |
| WATOX    | Pueschel et al. (1988)        |     | x       |         |        |     |         |           |     |
| WATOX    | Schnell et al. (1987)         | x   | x       |         |        |     |         |           |     |
| WATOX    | Stunder et al. (1987)         |     |         |         |        |     |         |           | x   |
| WATOX    | Whelpdale et al. (1987)       | x   | x       |         |        |     |         |           |     |
| WINTER   | Guo et al. (2016)             |     | x       |         |        |     |         |           |     |
| WINTER   | Haskins et al. (2019)         | x   | x       |         |        |     |         |           |     |
| WINTER   | Salmon et al. (2018)          | x   |         |         |        |     |         | x         |     |
| WINTER   | Schroder et al. (2018)        | x   | x       |         |        |     |         | x         |     |
| WINTER   | Shah et al. (2018)            | x   | x       |         |        |     |         |           |     |
| WINTER   | Shah et al. (2019)            |     | x       |         |        |     |         |           |     |
| WINTER   | Sullivan et al. (2019)        | x   | x       |         |        |     |         | x         |     |
| WINTER   | Wang et al. (2019)            | x   |         |         |        |     |         |           |     |

## References

- Ahmad, Z., Franz, B. A., McClain, C. R., Kwiatkowska, E. J., Werdell, J., Shettle, E. P., & Holben, B. N. (2010). New Aerosol Models for the Retrieval of Aerosol Optical Thickness and Normalized Water-Leaving Radiances from the SeaWiFS and Modis Sensors over Coastal Regions and Open Oceans. *Applied Optics*, 49(29), 5545-5560.
- Aldener, M., Brown, S. S., Stark, H., Williams, E. J., Lerner, B. M., Kuster, W. C., . . . Ravishankara, A. R. (2006). Reactivity and Loss Mechanisms of NO<sub>3</sub> and N<sub>2</sub>O<sub>5</sub> in a Polluted Marine Environment: Results from in Situ Measurements During New England Air Quality Study 2002. *Journal of Geophysical Research-Atmospheres*, 111(D23).
- Allen, D. J., Rood, R. B., Thompson, A. M., & Hudson, R. D. (1996). Three-Dimensional Radon 222 Calculations Using Assimilated Meteorological Data and a Convective Mixing Algorithm. *Journal of Geophysical Research-Atmospheres*, 101(D3), 6871-6881.
- Aller, J. Y., Radway, J. C., Kilthau, W. P., Bothe, D. W., Wilson, T. W., Vaillancourt, R. D., . . . Knopf, D. A. (2017). Size-Resolved Characterization of the Polysaccharidic and Proteinaceous Components of Sea Spray Aerosol. *Atmospheric Environment*, 154, 331-347.
- Alliss, R. J., & Raman, S. (1995a). Cloudiness and Its Relationship to Saturation Pressure Differences During a Developing East-Coast Winter Storm. *Journal of Applied Meteorology*, 34(11), 2367-2387.
- Alliss, R. J., & Raman, S. (1995b). Quantitative Estimates of Cloudiness over the Gulf-Stream Locale Using Goes Vas Observations. *Journal of Applied Meteorology*, 34(2), 500-510.
- Altieri, K. E., Hastings, M. G., Gobel, A. R., Peters, A. J., & Sigman, D. M. (2013). Isotopic Composition of Rainwater Nitrate at Bermuda: The Influence of Air Mass Source and Chemistry in the Marine Boundary Layer. *Journal of Geophysical Research-Atmospheres*, 118(19), 11304-11316.
- Altieri, K. E., Hastings, M. G., Peters, A. J., Oleynik, S., & Sigman, D. M. (2014). Isotopic Evidence for a Marine Ammonium Source in Rainwater at Bermuda. *Global Biogeochemical Cycles*, 28(10), 1066-1080.
- Altieri, K. E., Fawcett, S. E., Peters, A. J., Sigman, D. M., & Hastings, M. G. (2016). Marine Biogenic Source of Atmospheric Organic Nitrogen in the Subtropical North Atlantic. *Proceedings of the National Academy of Sciences of the United States of America*, 113(4), 925-930.
- Ambrose, J. L., Mao, H., Mayne, H. R., Stutz, J., Talbot, R., & Sive, B. C. (2007). Nighttime Nitrate Radical Chemistry at Appledore Island, Maine During the 2004 International Consortium for Atmospheric Research on Transport and Transformation. *Journal of Geophysical Research-Atmospheres*, 112(D21). doi:10.1029/2007jd008756
- Ambrose, J. L., Haase, K., Russo, R. S., Zhou, Y., White, M. L., Frinak, E. K., . . . Sive, B. C. (2010). A Comparison of GC-FID and PTR-MS Toluene Measurements in Ambient Air under Conditions of Enhanced Monoterpene Loading. *Atmospheric Measurement Techniques*, 3(4), 959-980. doi:10.5194/amt-3-959-2010
- Ambrose, J. L., Zhou, Y., Haase, K., Mayne, H. R., Talbot, R., & Sive, B. C. (2012). A Gas Chromatographic Instrument for Measurement of Hydrogen Cyanide in the Lower Atmosphere. *Atmospheric Measurement Techniques*, 5(6), 1229-1240. doi:10.5194/amt-5-1229-2012

- Anderson, B. E., Gregory, G. L., Barrick, J. D. W., Collins, J. E., Sachse, G. W., Bagwell, D., . . . Sandholm, S. T. (1993). The Impact of United-States Continental Outflow on Ozone and Aerosol Distributions over the Western Atlantic. *Journal of Geophysical Research-Atmospheres*, 98(D12), 23477-23489.
- Anderson, J. R., Buseck, P. R., Patterson, T. L., & Arimoto, R. (1996). Characterization of the Bermuda Tropospheric Aerosol by Combined Individual-Particle and Bulk-Aerosol Analysis. *Atmospheric Environment*, 30(2), 319-338.
- Anderson, D. C., Loughner, C. P., Diskin, G., Weinheimer, A., Canty, T. P., Salawitch, R. J., . . . Dickerson, R. R. (2014). Measured and Modeled CO and NO<sub>y</sub> in DISCOVER-AQ: An Evaluation of Emissions and Chemistry over the Eastern US. *Atmospheric Environment*, 96, 78-87. doi:10.1016/j.atmosenv.2014.07.004
- Andersson, A. J., Krug, L. A., Bates, N. R., & Doney, S. C. (2013). Sea-Air CO<sub>2</sub> Flux in the North Atlantic Subtropical Gyre: Role and Influence of Sub-Tropical Mode Water Formation. *Deep-Sea Research Part II-Topical Studies in Oceanography*, 91, 57-70.
- Andreae, T. W., Andreae, M. O., Bingemer, H. G., & Leck, C. (1993). Measurements of Dimethyl Sulfide and H<sub>2</sub>S over the Western North-Atlantic and the Tropical Atlantic. *Journal of Geophysical Research-Atmospheres*, 98(D12), 23389-23396.
- Angevine, W. M., Trainer, M., McKeen, S. A., & Berkowitz, C. M. (1996). Mesoscale Meteorology of the New England Coast, Gulf of Maine, and Nova Scotia: Overview. *Journal of Geophysical Research-Atmospheres*, 101(D22), 28893-28901.
- Angevine, W. M., Hare, J. E., Fairall, C. W., Wolfe, D. E., Hill, R. J., Brewer, W. A., & White, A. B. (2006). Structure and Formation of the Highly Stable Marine Boundary Layer over the Gulf of Maine. *Journal of Geophysical Research: Atmospheres*, 111(D23). doi:10.1029/2006jd007465
- Appenzeller, C., Weiss, A. K., & Staehelin, J. (2000). North Atlantic Oscillation Modulates Total Ozone Winter Trends. *Geophysical Research Letters*, 27(8), 1131-1134.
- Arimoto, R. (2001). Eolian Dust and Climate: Relationships to Sources, Tropospheric Chemistry, Transport and Deposition. *Earth-Science Reviews*, 54(1), 29-42. doi:https://doi.org/10.1016/S0012-8252(01)00040-X
- Arimoto, R., Duce, R. A., Savoie, D. L., & Prospero, J. M. (1992). Trace-Elements in Aerosol-Particles from Bermuda and Barbados - Concentrations, Sources and Relationships to Aerosol Sulfate. *Journal of Atmospheric Chemistry*, 14(1-4), 439-457.
- Arimoto, R., Duce, R. A., Ray, B. J., Ellis, W. G., Cullen, J. D., & Merrill, J. T. (1995). Trace-Elements in the Atmosphere over the North-Atlantic. *Journal of Geophysical Research-Atmospheres*, 100(D1), 1199-1213. doi:10.1029/94jd02618
- Arimoto, R., Ray, B. J., Lewis, N. F., Tomza, U., & Duce, R. A. (1997). Mass-Particle Size Distributions of Atmospheric Dust and the Dry Deposition of Dust to the Remote Ocean. *Journal of Geophysical Research-Atmospheres*, 102(D13), 15867-15874.
- Arimoto, R., Snow, J. A., Graustein, W. C., Moody, J. L., Ray, B. J., Duce, R. A., . . . Maring, H. B. (1999). Influences of Atmospheric Transport Pathways on Radionuclide Activities in Aerosol Particles from over the North Atlantic. *Journal of Geophysical Research-Atmospheres*, 104(D17), 21301-21316.

- Arimoto, R., Balsam, W., & Schloesslin, C. (2002). Visible Spectroscopy of Aerosol Particles Collected on Filters: Iron-Oxide Minerals. *Atmospheric Environment*, 36(1), 89-96.
- Arimoto, R., Duce, R. A., Ray, B. J., & Tomza, U. (2003). Dry Deposition of Trace Elements to the Western North Atlantic. *Global Biogeochemical Cycles*, 17(1).
- Artz, R. S., & Stunder, B. J. B. (1987). Calculation of Air Flux Values from Watox 1986 Wp-3d Aircraft Observations. *Global Biogeochemical Cycles*, 1(4), 309-316.
- Aryal, R. P., Voss, K. J., Terman, P. A., Keene, W. C., Moody, J. L., Welton, E. J., & Holben, B. N. (2014). Comparison of Surface and Column Measurements of Aerosol Scattering Properties over the Western North Atlantic Ocean at Bermuda. *Atmospheric Chemistry and Physics*, 14(14), 7617-7629.
- Atlas, D., Chou, S. H., & Byerly, W. P. (1983). The Influence of Coastal Shape on Winter Mesoscale Air Sea Interaction. *Monthly Weather Review*, 111(2), 245-252.
- Audiffren, N., Buisson, E., Cautenet, S., & Chaumerliac, N. (2004). Photolytic Impact of a Stratocumulus Cloud Layer Upon the Chemistry of an Offshore Advected Plume of Pollutants During the NARE 1993 Intensive Experiment: A Numerical Study. *Atmospheric Research*, 70(2), 89-108. doi:10.1016/j.atmosres.2004.01.004
- Avey, L., Garrett, T. J., & Stohl, A. (2007). Evaluation of the Aerosol Indirect Effect Using Satellite, Tracer Transport Model, and Aircraft Data from the International Consortium for Atmospheric Research on Transport and Transformation. *Journal of Geophysical Research-Atmospheres*, 112(D10). doi:10.1029/2006jd007581
- Babin, S. M., Sikora, T. D., & Winstead, N. S. (2003). A Case Study of Satellite Synthetic Aperture Radar Signatures of Spatially Evolving Atmospheric Convection over the Western Atlantic Ocean. *Boundary-Layer Meteorology*, 106(3), 527-546.
- Babin, S. M., Carton, J. A., Dickey, T. D., & Wiggert, J. D. (2004). Satellite Evidence of Hurricane-Induced Phytoplankton Blooms in an Oceanic Desert. *Journal of Geophysical Research: Oceans*, 109(C3). doi:10.1029/2003jc001938
- Bahadur, R., Uplinger, T., Russell, L. M., Sive, B. C., Cliff, S. S., Millet, D. B., . . . Bates, T. S. (2010). Phenol Groups in Northeastern Us Submicrometer Aerosol Particles Produced from Seawater Sources. *Environmental Science & Technology*, 44(7), 2542-2548. doi:10.1021/es9032277
- Baker, J. I., & Hites, R. A. (1999). Polychlorinated Dibenzo-P-Dioxins and Dibenzofurans in the Remote North Atlantic Marine Atmosphere. *Environmental Science & Technology*, 33(1), 14-20.
- Baker, A. R., Kanakidou, M., Altieri, K. E., Daskalakis, N., Okin, G. S., Myriokefalitakis, S., . . . Prospero, J. M. (2017). Observation- and Model-Based Estimates of Particulate Dry Nitrogen Deposition to the Oceans. *Atmos. Chem. Phys.*, 17(13), 8189-8210. doi:10.5194/acp-17-8189-2017
- Bane, J., & Osgood, K. E. (1989). Wintertime Air-Sea Interaction Processes across the Gulf-Stream. *Journal of Geophysical Research-Oceans*, 94(C8), 10755-&.
- Banic, C. M., Leitch, W. R., Isaac, G. A., Couture, M. D., Kleinman, L. I., Springston, S. R., & MacPherson, J. I. (1996). Transport of Ozone and Sulfur to the North Atlantic Atmosphere During the North Atlantic Regional Experiment. *Journal of Geophysical Research-Atmospheres*, 101(D22), 29091-29104.

- Bardwell, C. A., Maben, J. R., Hurt, J. A., Keene, W. C., Galloway, J. N., Boatman, I. F., & Wellman, D. L. (1990). A Technique Using High-Flow, Dichotomous Filter Packs for Measuring Major Atmospheric Chemical Constituents. *Global Biogeochemical Cycles*, 4(2), 151-163.
- Bates, N. R., & Peters, A. J. (2007). The Contribution of Atmospheric Acid Deposition to Ocean Acidification in the Subtropical North Atlantic Ocean. *Marine Chemistry*, 107(4), 547-558.
- Bates, T. S., Quinn, P. K., Coffman, D. J., Johnson, J. E., Miller, T. L., Covert, D. S., . . . Neususs, C. (2001). Regional Physical and Chemical Properties of the Marine Boundary Layer Aerosol across the Atlantic During Aerosols99: An Overview. *Journal of Geophysical Research-Atmospheres*, 106(D18), 20767-20782. doi:10.1029/2000jd900578
- Bates, T. S., Coffman, D. J., Covert, D. S., & Quinn, P. K. (2002). Regional Marine Boundary Layer Aerosol Size Distributions in the Indian, Atlantic, and Pacific Oceans: A Comparison of Indoex Measurements with Ace-1, Ace-2, and Aerosols99. *Journal of Geophysical Research-Atmospheres*, 107(D19).
- Bates, T. S., Quinn, P. K., Coffman, D. J., Johnson, J. E., & Middlebrook, A. M. (2005). Dominance of Organic Aerosols in the Marine Boundary Layer over the Gulf of Maine During Neaqs 2002 and Their Role in Aerosol Light Scattering. *Journal of Geophysical Research-Atmospheres*, 110(D18).
- Bates, T. S., Anderson, T. L., Baynard, T., Bond, T., Boucher, O., Carmichael, G., . . . Wu, Y. (2006). Aerosol Direct Radiative Effects over the Northwest Atlantic, Northwest Pacific, and North Indian Oceans: Estimates Based on in-Situ Chemical and Optical Measurements and Chemical Transport Modeling. *Atmospheric Chemistry and Physics*, 6, 1657-1732. doi:10.5194/acp-6-1657-2006
- Beattie, B. L., & Whelpdale, D. M. (1989). Meteorological Characteristics of Large Acidic Deposition Events at Kejimikujik, Nova-Scotia. *Water Air and Soil Pollution*, 46(1-4), 45-59.
- Beaupré, S. R., Kieber, D. J., Keene, W. C., Long, M. S., Maben, J. R., Lu, X., . . . Bisgrove, J. (2019). Oceanic Efflux of Ancient Marine Dissolved Organic Carbon in Primary Marine Aerosol. *Science Advances*, 5(10), eaax6535. doi:10.1126/sciadv.aax6535
- Bechtold, P., Fravallo, C., & Pinty, J. P. (1992). A Study of a 2-Dimensional Cloudiness Transition During a Cold Air Outbreak Event. *Boundary-Layer Meteorology*, 60(3), 243-270.
- Behrenfeld, M. J., Moore, R. H., Hostetler, C. A., Graff, J., Gaube, P., Russell, L. M., . . . Ziemba, L. (2019). The North Atlantic Aerosol and Marine Ecosystem Study (NAAMES): Science Motive and Mission Overview. *Frontiers in Marine Science*, 6.
- Benetti, M., Steen-Larsen, H. C., Reverdin, G., Sveinbjornsdottir, A. E., Aloisi, G., Berkelhammer, M. B., . . . Winther, M. (2017). Stable Isotopes in the Atmospheric Marine Boundary Layer Water Vapour over the Atlantic Ocean, 2012-2015. *Scientific Data*, 4.
- Benitez-Nelson, C. R., & Buesseler, K. Q. (1999). Phosphorus 32, Phosphorus 37, Beryllium 7, and Lead 210: Atmospheric Fluxes and Utility in Tracing Stratosphere Troposphere Exchange. *Journal of Geophysical Research-Atmospheres*, 104(D9), 11745-11754. doi:10.1029/1998jd100101

Berg, L. K., Fast, J. D., Barnard, J. C., Burton, S. P., Cairns, B., Chand, D., . . . Berkowitz, C. M. (2016). The Two-Column Aerosol Project: Phase I-Overview and Impact of Elevated Aerosol Layers on Aerosol Optical Depth. *Journal of Geophysical Research-Atmospheres*, 121(1), 336-361. doi:10.1002/2015jd023848

Bergamaschi, P., Frankenberg, C., Meirink, J. F., Krol, M., Villani, M. G., Houweling, S., . . . Levin, I. (2009). Inverse Modeling of Global and Regional Ch<sub>4</sub> Emissions Using Sciamachy Satellite Retrievals. *Journal of Geophysical Research-Atmospheres*, 114.

Bergstrom, R. M., & Russell, P. B. (1999). Estimation of Aerosol Direct Radiative Effects over the Mid-Latitude North Atlantic from Satellite and in Situ Measurements. *Geophysical Research Letters*, 26(12), 1731-1734.

Berkelhammer, M., Steen-Larsen, H. C., Cosgrove, A., Peters, A. J., Johnson, R., Hayden, M., & Montzka, S. A. (2016). Radiation and Atmospheric Circulation Controls on Carbonyl Sulfide Concentrations in the Marine Boundary Layer. *Journal of Geophysical Research-Atmospheres*, 121(21), 13113-13128.

Berkes, F., Neis, P., Schultz, M. G., Bundke, U., Rohs, S., Smit, H. G. J., . . . Petzold, A. (2017). In Situ Temperature Measurements in the Upper Troposphere and Lowermost Stratosphere from 2 decades of IAGOS Long-Term Routine Observation. *Atmos. Chem. Phys.*, 17(20), 12495-12508. doi:10.5194/acp-17-12495-2017

Berkowitz, C. M., Busness, K. M., Chapman, E. G., Thorp, J. M., & Saylor, R. D. (1995). Observations of Depleted Ozone within the Boundary-Layer of the Western North-Atlantic. *Journal of Geophysical Research-Atmospheres*, 100(D6), 11483-11496.

Bernhardt, J. E., & DeGaetano, A. T. (2012). Meteorological Factors Affecting the Speed of Movement and Related Impacts of Extratropical Cyclones Along the U.S. East Coast. *Natural Hazards*, 61(3), 1463-1472. doi:10.1007/s11069-011-0078-0

Berresheim, H., Andreae, M. O., Iverson, R. L., & Li, S. M. (1991). Seasonal-Variations of Dimethylsulfide Emissions and Atmospheric Sulfur and Nitrogen Species over the Western North-Atlantic Ocean. *Tellus Series B-Chemical and Physical Meteorology*, 43(5), 353-372.

Beyersdorf, A. J., Ziemba, L. D., Chen, G., Corr, C. A., Crawford, J. H., Diskin, G. S., . . . Anderson, B. E. (2016). The Impacts of Aerosol Loading, Composition, and Water Uptake on Aerosol Extinction Variability in the Baltimore-Washington, Dc Region. *Atmospheric Chemistry and Physics*, 16(2), 1003-1015. doi:10.5194/acp-16-1003-2016

Black, W. J., & Dickey, T. D. (2008). Observations and Analyses of Upper Ocean Responses to Tropical Storms and Hurricanes in the Vicinity of Bermuda. *Journal of Geophysical Research: Oceans*, 113(C8). doi:10.1029/2007jc004358

Blanton, J. O., Amft, J. A., Lee, D. K., & Riordan, A. (1989). Wind Stress and Heat Fluxes Observed During Winter and Spring 1986. *Journal of Geophysical Research-Oceans*, 94(C8), 10686-10698.

Blumenthal, D. L., McDonald, J. A., Keifer, W. S., Tommerdahl, J. B., Saeger, M. L., & White, J. H. (1984). Three-Dimensional Pollutant Distribution and Mixing Layer Structure in the Northeast U.S., Summary of Sulfate Regional Experiment (SURE) Aircraft Measurements. *Atmospheric Environment* (1967), 18(4), 733-749. [https://doi.org/10.1016/0004-6981\(84\)90258-0](https://doi.org/10.1016/0004-6981(84)90258-0)



Boatman, J. F., Wellman, D. L., Schnell, R. C., Busness, K. M., Luria, M., & Van Valin, C. (1988). In-Flight Intercomparisons of Some Aircraft Meteorological and Chemical Measurement Techniques. *Global Biogeochemical Cycles*, 2(1), 1-11.

Boers, R., & Melfi, S. H. (1987). Cold Air Outbreak During Masex - Lidar Observations and Boundary-Layer Model Test. *Boundary-Layer Meteorology*, 39(1-2), 41-51.

Boers, R., Melfi, S. H., & Palm, S. P. (1991). Cold-Air Outbreak During Gale - Lidar Observations and Modeling of Boundary-Layer Dynamics. *Monthly Weather Review*, 119(5), 1132-1150.

Bonne, J. L., Steen-Larsen, H. C., Risi, C., Werner, M., Sodemann, H., Lacour, J. L., . . . Masson-Delmotte, V. (2015). The Summer 2012 Greenland Heat Wave: In Situ and Remote Sensing Observations of Water Vapor Isotopic Composition During an Atmospheric River Event. *Journal of Geophysical Research-Atmospheres*, 120(7), 2970-2989.

Booth, B. B. B., Dunstone, N. J., Halloran, P. R., Andrews, T., & Bellouin, N. (2012). Aerosols Implicated as a Prime Driver of Twentieth-Century North Atlantic Climate Variability (Vol 484, Pg 228, 2012). *Nature*, 485(7399), 534-534.

Bosart, L. F. (1981). The Presidents Day Snowstorm of 18-19 February 1979 - a Subsynoptic-Scale Event. *Monthly Weather Review*, 109(7), 1542-1566.

Bottenheim, J. W., & Gallant, A. J. (1987). The Occurrence of Peroxyacetyl Nitrate over the Atlantic Ocean East of North America During Watox-86. *Global Biogeochemical Cycles*, 1(4), 369-380.

Boylan, P., Helmig, D., & Oltmans, S. (2015). Ozone in the Atlantic Ocean Marine Boundary Layer. *Elementa-Science of the Anthropocene*, 3.

Brennan, M. J., & Lackmann, G. M. (2005). The Influence of Incipient Latent Heat Release on the Precipitation Distribution of the 24–25 January 2000 U.S. East Coast Cyclone. *Monthly Weather Review*, 133(7), 1913-1937. doi:10.1175/MWR2959.1

Brent, L. C., Thorn, W. J., Gupta, M., Leen, B., Stehr, J. W., He, H., . . . Dickerson, R. R. (2015). Evaluation of the Use of a Commercially Available Cavity Ringdown Absorption Spectrometer for Measuring No<sub>2</sub> in Flight, and Observations over the Mid-Atlantic States, During Discover-Aq. *Journal of Atmospheric Chemistry*, 72(3), 503-521. doi:10.1007/s10874-013-9265-6

Brice, K. A., Bottenheim, J. W., Anlauf, K. G., & Wiebe, H. A. (1988). Long-Term Measurements of Atmospheric Peroxyacetylnitrate (PAN) at Rural Sites in Ontario and Nova Scotia; Seasonal Variations and Long-Range Transport. *Tellus B: Chemical and Physical Meteorology*, 40(5), 408-425. doi:10.3402/tellusb.v40i5.16007

Bridgman, H. A., & Sievering, H. (1988). Large and Giant Aerosols in the Marine Boundary Layer During WATOX, January 4-9, 1986. *Global Biogeochemical Cycles*, 2(1), 13-21.

Bridgman, H. A., Schnell, R. C., Bodhaine, B. A., & Oltmans, S. J. (1988). Aerosol and Ozone Distributions over the Western North Atlantic During WATOX-86. *Global Biogeochemical Cycles*, 2(1), 23-39.

Brown, S. S., Osthoff, H. D., Stark, H., Dubé, W. P., Ryerson, T. B., Warneke, C., . . . Ravishankara, A. R. (2005). Aircraft Observations of Daytime No<sub>3</sub> and N<sub>2</sub>O<sub>5</sub> and Their

Implications for Tropospheric Chemistry. *Journal of Photochemistry and Photobiology A: Chemistry*, 176(1), 270-278. <https://doi.org/10.1016/j.jphotochem.2005.10.004>

Brown, S. S., Ryerson, T. B., Wollny, A. G., Brock, C. A., Peltier, R., Sullivan, A. P., . . . Ravishankara, A. R. (2006a). Variability in Nocturnal Nitrogen Oxide Processing and Its Role in Regional Air Quality. *Science*, 311(5757), 67-70. doi:10.1126/science.1120120

Brown, S. S., Neuman, J. A., Ryerson, T. B., Trainer, M., Dube, W. P., Holloway, J. S., . . . Ravishankara, A. R. (2006b). Nocturnal Odd-Oxygen Budget and Its Implications for Ozone Loss in the Lower Troposphere. *Geophysical Research Letters*, 33(8). doi:10.1029/2006gl025900

Buhr, M., Sueper, D., Trainer, M., Goldan, P., Kuster, B., Fehsenfeld, F., . . . Schanot, A. (1996). Trace Gas and Aerosol Measurements Using Aircraft Data from the North Atlantic Regional Experiment (NARE 1993). *Journal of Geophysical Research-Atmospheres*, 101(D22), 29013-29027.

Bulgin, C. E., Palmer, P. I., Thomas, G. E., Arnold, C. P. G., Campmany, E., Carboni, E., . . . Lawrence, B. N. (2008). Regional and Seasonal Variations of the Twomey Indirect Effect as Observed by the ATSR-2 Satellite Instrument. *Geophysical Research Letters*, 35(2). doi:10.1029/2007gl031394

Bunker, A. F. (1976). Computations of Surface-Energy Flux and Annual Air-Sea Interaction Cycles of North-Atlantic Ocean. *Monthly Weather Review*, 104(9), 1122-1140.

Bunker, A. F., & Worthington, L. V. (1976). Energy Exchange Charts of North-Atlantic Ocean. *Bulletin of the American Meteorological Society*, 57(6), 670-678.

Businger, S. (1995). Cool-Season Cyclogenesis and Associated Mesoscale Weather. *Reviews of Geophysics*, 33, 907-915.

Cahill, T. A. (1988). Investigation of Particulate Matter by Size and Composition During WATOX, January 1986. *Global Biogeochemical Cycles*, 2(1), 47-55.

Cain, M., Methven, J., & Highwood, E. J. (2012). Quantification of Chemical and Physical Processes Influencing Ozone During Long-Range Transport Using a Trajectory Ensemble. *Atmospheric Chemistry and Physics*, 12(15), 7015-7039.

Carson, R. E. (1950). The Gulf Stream Front: A Cause of Stratus on the Lower Atlantic Coast. *Monthly Weather Review*, 78(6), 91-101. doi:10.1175/1520-0493(1950)078<0091:tgsfac>2.0.co;2

Castanho, A. D. D., Martins, J. V., Hobbs, P. V., Artaxo, P., Remer, L., Yamasoe, M., & Colarco, P. R. (2005). Chemical Characterization of Aerosols on the East Coast of the United States Using Aircraft and Ground-Based Stations During the CLAMS Experiment. *Journal of the Atmospheric Sciences*, 62(4), 934-946. doi:10.1175/Jas3388.1

Cervený, R. S., & Balling, R. C. (1998). Weekly Cycles of Air Pollutants, Precipitation and Tropical Cyclones in the Coastal Nw Atlantic Region. *Nature*, 394(6693), 561-563.

Chang, S. W., & Holt, T. R. (1994). Impact of Assimilating SSM/I Rainfall Rates on Numerical Prediction of Winter Cyclones. *Monthly Weather Review*, 122(1), 151-164.

Charles, M. E., & Colle, B. A. (2009a). Verification of Extratropical Cyclones within the NCEP Operational Models. Part I: Analysis Errors and Short-Term NAM and GFS Forecasts. *Weather and Forecasting*, 24(5), 1173-1190. doi:10.1175/2009waf2222169.1

- Charles, M. E., & Colle, B. A. (2009b). Verification of Extratropical Cyclones within the NCEP Operational Models. Part II: The Short-Range Ensemble Forecast System. *Weather and Forecasting*, 24(5), 1191-1214. doi:10.1175/2009waf2222170.1
- Charnock, H., & Businger, J. A. (1991). The Frontal Air-Sea Interaction Experiment in Perspective. *Journal of Geophysical Research-Oceans*, 96(C5), 8639-8642.
- Chelton, D. B., Schlax, M. G., Freilich, M. H., & Milliff, R. F. (2004). Satellite Measurements Reveal Persistent Small-Scale Features in Ocean Winds. *Science*, 303(5660), 978-983. doi:10.1126/science.1091901
- Chen, L. Q., & Duce, R. A. (1983). The Sources of Sulfate, Vanadium and Mineral Matter in Aerosol-Particles over Bermuda. *Atmospheric Environment*, 17(10), 2055-2064.
- Chen, L. W. A., Doddridge, B. G., Dickerson, R. R., Chow, J. C., Mueller, P. K., Quinn, J., & Butler, W. A. (2001). Seasonal Variations in Elemental Carbon Aerosol, Carbon Monoxide and Sulfur Dioxide: Implications for Sources. *Geophysical Research Letters*, 28(9), 1711-1714.
- Chen, L. W. A., Chow, J. C., Doddridge, B. G., Dickerson, R. R., Ryan, W. F., & Mueller, P. K. (2003). Analysis of a Summertime PM<sub>2.5</sub> and Haze Episode in the Mid-Atlantic Region. *Journal of the Air & Waste Management Association*, 53(8), 946-956.
- Chen, J. J., Mao, H. T., Talbot, R. W., & Griffin, R. J. (2006). Application of the CACM and MPMPO Modules Using the CMAQ Model for the Eastern United States. *Journal of Geophysical Research-Atmospheres*, 111(D23). doi:10.1029/2006jd007603
- Chen, C., Sedwick, P. N., & Sharma, M. (2009). Anthropogenic Osmium in Rain and Snow Reveals Global-Scale Atmospheric Contamination. *Proceedings of the National Academy of Sciences of the United States of America*, 106(19), 7724-7728.
- Cheng, Y., Wang, Y. H., Zhang, Y. Z., Chen, G., Crawford, J. H., Kleb, M. M., . . . Weinheimer, A. J. (2017). Large Biogenic Contribution to Boundary Layer O<sub>3</sub>-CO Regression Slope in Summer. *Geophysical Research Letters*, 44(13), 7061-7068. doi:10.1002/2017gl074405
- Cheng, Y., Wang, Y. H., Zhang, Y. Z., Crawford, J. H., Diskin, G. S., Weinheimer, A. J., & Fried, A. (2018). Estimator of Surface Ozone Using Formaldehyde and Carbon Monoxide Concentrations over the Eastern United States in Summer. *Journal of Geophysical Research-Atmospheres*, 123(14), 7642-7655. doi:10.1029/2018jd028452
- Chevallier, F., Ciais, P., Conway, T. J., Aalto, T., Anderson, B. E., Bousquet, P., . . . Worthy, D. (2010). CO<sub>2</sub> Surface Fluxes at Grid Point Scale Estimated from a Global 21 Year Reanalysis of Atmospheric Measurements. *Journal of Geophysical Research-Atmospheres*, 115.
- Chou, S. H., & Atlas, D. (1982). Satellite Estimates of Ocean Air Heat Fluxes During Cold Air Outbreaks. *Monthly Weather Review*, 110(10), 1434-1450.
- Chou, S. H., & Ferguson, M. P. (1991). Heat Fluxes and Roll Circulations over the Western Gulf-Stream During an Intense Cold-Air Outbreak. *Boundary-Layer Meteorology*, 55(3), 255-281.
- Chowdhary, J., Cairns, B., Mishchenko, M. I., Hobbs, P. V., Cota, G. F., Redemann, J., . . . Russell, E. (2005). Retrieval of Aerosol Scattering and Absorption Properties from Photopolarimetric Observations over the Ocean During the CLAMS Experiment. *Journal of the Atmospheric Sciences*, 62(4), 1093-1117.

Christoudias, T., Pozzer, A., & Lelieveld, J. (2012). Influence of the North Atlantic Oscillation on Air Pollution Transport. *Atmospheric Chemistry and Physics*, 12(2), 869-877. doi:10.5194/acp-12-869-2012

Chu, D. A., Ferrare, R., Szykman, J., Lewis, J., Scarino, A., Hains, J., . . . Crawford, J. (2015). Regional Characteristics of the Relationship between Columnar AOD and Surface PM<sub>2.5</sub>: Application of Lidar Aerosol Extinction Profiles over Baltimore-Washington Corridor During DISCOVER-AQ. *Atmospheric Environment*, 101, 338-349. doi:10.1016/j.atmosenv.2014.11.034

Church, T. M., Galloway, J. N., Jickells, T. D., & Knap, A. H. (1982). The Chemistry of Western Atlantic Precipitation at the Mid-Atlantic Coast and on Bermuda. *Journal of Geophysical Research-Oceans and Atmospheres*, 87(Nc13), 1013-1018.

Church, T. M., Tramontano, J. M., Scudlark, J. R., Jickells, T. D., Tokos, J. J., Knap, A. H., & Galloway, J. N. (1984). The Wet Deposition of Trace-Metals to the Western Atlantic Ocean at the Mid-Atlantic Coast and on Bermuda. *Atmospheric Environment*, 18(12), 2657-2664.

Church, T. M., Veron, A., Patterson, C. C., Settle, D., Erel, Y., Maring, H. R., & Flegal, A. R. (1990). Trace Elements in the North Atlantic Troposphere: Shipboard Results of Precipitation and Aerosols. *Global Biogeochemical Cycles*, 4(4), 431-443.

Church, T. M., Tramontano, J. M., Whelpdale, D. M., Andreae, M. O., Galloway, J. N., Keene, W. C., . . . Tokos, J. (1991). Atmospheric and Precipitation Chemistry over the North-Atlantic Ocean - Shipboard Results, April-May 1984. *Journal of Geophysical Research-Atmospheres*, 96(D10), 18705-18725.

Cione, J. J., Raman, S., & Pietrafesa, L. J. (1993). The Effect of Gulf Stream-Induced Baroclinicity on United-States East-Coast Winter Cyclones. *Monthly Weather Review*, 121(2), 421-430.

Clarke, A., McNaughton, C., Kapustin, V., Shinozuka, Y., Howell, S., Dibb, J., . . . Pinkerton, M. (2007). Biomass Burning and Pollution Aerosol over North America: Organic Components and Their Influence on Spectral Optical Properties and Humidification Response. *Journal of Geophysical Research-Atmospheres*, 112(D12).

Cogbill, C. V., & Likens, G. E. (1974). Acid Precipitation in the Northeastern United States. *Water Resources Research*, 10(6), 1133-1137. doi:10.1029/WR010i006p01133

Cohen, Y., Petetin, H., Thouret, V., Marécal, V., Josse, B., Clark, H., . . . Nédélec, P. (2018). Climatology and Long-Term Evolution of Ozone and Carbon Monoxide in the Upper Troposphere–Lower Stratosphere (UTLS) at Northern Midlatitudes, as Seen by Iagos from 1995 to 2013. *Atmos. Chem. Phys.*, 18(8), 5415-5453. doi:10.5194/acp-18-5415-2018

Colarco, P. R., Kahn, R. A., Remer, L. A., & Levy, R. C. (2014). Impact of Satellite Viewing-Swath Width on Global and Regional Aerosol Optical Thickness Statistics and Trends. *Atmos. Meas. Tech.*, 7(7), 2313-2335. doi:10.5194/amt-7-2313-2014

Colle, R., Unterweger, M. P., Hodge, P. A., Hutchinson, J. M. R., Whittlestone, S., Polian, G., . . . Hutter, A. R. (1995). An International Intercomparison of Marine Atmospheric Radon-222 Measurements in Bermuda. *Journal of Geophysical Research-Atmospheres*, 100(D8), 16617-16638.

Compton, J. C., Delgado, R., Berkoff, T. A., & Hoff, R. M. (2013). Determination of Planetary Boundary Layer Height on Short Spatial and Temporal Scales: A Demonstration of the Covariance Wavelet Transform in Ground-Based Wind Profiler and Lidar Measurements. *Journal of Atmospheric and Oceanic Technology*, 30(7), 1566-1575. doi:10.1175/Jtech-D-12-00116.1

Conte, M. H., & Weber, J. C. (2002a). Long-Range Atmospheric Transport of Terrestrial Biomarkers to the Western North Atlantic. *Global Biogeochemical Cycles*, 16(4).

Conte, M. H., & Weber, J. C. (2002b). Plant Biomarkers in Aerosols Record Isotopic Discrimination of Terrestrial Photosynthesis. *Nature*, 417(6889), 639-641.

Cook, P. A., Savage, N. H., Turquety, S., Carver, G. D., O'Connor, F. M., Heckel, A., . . . Pyle, J. A. (2007). Forest Fire Plumes over the North Atlantic: P-Tomcat Model Simulations with Aircraft and Satellite Measurements from the ITOP/ICARTT Campaign. *Journal of Geophysical Research-Atmospheres*, 112(D10).

Cooper, D. J., & Saltzman, E. S. (1993). Measurements of Atmospheric Dimethylsulfide, Hydrogen-Sulfide, and Carbon-Disulfide During GTE CITE-3. *Journal of Geophysical Research-Atmospheres*, 98(D12), 23397-23409.

Cooper, W. J., Cooper, D. J., Saltzman, E. S., Demello, W. Z., Savoie, D. L., Zika, R. G., & Prospero, J. M. (1987). Emissions of Biogenic Sulfur-Compounds from Several Wetland Soils in Florida. *Atmospheric Environment*, 21(7), 1491-1495. doi:10.1016/0004-6981(87)90311-8

Cooper, O. R., Moody, J. L., Davenport, J. C., Oltmans, S. J., Johnson, B. J., Chen, X., . . . Merrill, J. T. (1998). Influence of Springtime Weather Systems on Vertical Ozone Distributions over Three North American Sites. *Journal of Geophysical Research-Atmospheres*, 103(D17), 22001-22013.

Cooper, O. R., Moody, J. L., Parrish, D. D., Trainer, M., Ryerson, T. B., Holloway, J. S., . . . Evans, M. J. (2001). Trace Gas Signatures of the Airstreams within North Atlantic Cyclones: Case Studies from the North Atlantic Regional Experiment (NARE '97) Aircraft Intensive. *Journal of Geophysical Research-Atmospheres*, 106(D6), 5437-5456.

Cooper, O. R., Moody, J. L., Parrish, D. D., Trainer, M., Holloway, J. S., Hubler, G., . . . Stohl, A. (2002a). Trace Gas Composition of Midlatitude Cyclones over the Western North Atlantic Ocean: A Seasonal Comparison of O<sub>3</sub> and CO. *Journal of Geophysical Research-Atmospheres*, 107(D7-8).

Cooper, O. R., Moody, J. L., Parrish, D. D., Trainer, M., Ryerson, T. B., Holloway, J. S., . . . Evans, M. J. (2002b). Trace Gas Composition of Midlatitude Cyclones over the Western North Atlantic Ocean: A Conceptual Model. *Journal of Geophysical Research-Atmospheres*, 107(D7-8).

Cornell, S., Rendell, A., & Jickells, T. (1995). Atmospheric Inputs of Dissolved Organic Nitrogen to the Oceans. *Nature*, 376(6537), 243-246. doi:10.1038/376243a0

Cornell, S. E., Jickells, T. D., & Thornton, C. A. (1998). Urea in Rainwater and Atmospheric Aerosol. *Atmospheric Environment*, 32(11), 1903-1910. doi:10.1016/S1352-2310(97)00487-1

Creilson, J. K., Fishman, J., & Wozniak, A. E. (2003). Intercontinental Transport of Tropospheric Ozone: A Study of Its Seasonal Variability across the North Atlantic Utilizing

Tropospheric Ozone Residuals and Its Relationship to the North Atlantic Oscillation. *Atmospheric Chemistry and Physics*, 3, 2053-2066.

Crespo, J. A., & Posselt, D. J. (2016). A-Train-Based Case Study of Stratiform-Convective Transition within a Warm Conveyor Belt. *Monthly Weather Review*, 144(6).

Crimmins, B. S., Dickerson, R. R., Doddridge, B. G., & Baker, J. E. (2004). Particulate Polycyclic Aromatic Hydrocarbons in the Atlantic and Indian Ocean Atmospheres During the Indian Ocean Experiment and Aerosols99: Continental Sources to the Marine Atmosphere. *Journal of Geophysical Research-Atmospheres*, 109(D5).

Cronin, M. F., Gentemann, C. L., Edson, J., Ueki, I., Bourassa, M., Brown, S., . . . Zhang, D. X. (2019). Air-Sea Fluxes with a Focus on Heat and Momentum. *Frontiers in Marine Science*, 6.

Crumeyrolle, S., Chen, G., Ziemba, L., Beyersdorf, A., Thornhill, L., Winstead, E., . . . Anderson, B. E. (2014). Factors That Influence Surface Pm2.5 Values Inferred from Satellite Observations: Perspective Gained for the Us Baltimore-Washington Metropolitan Area During DISCOVER-AQ. *Atmospheric Chemistry and Physics*, 14(4), 2139-2153. doi:10.5194/acp-14-2139-2014

Cutter, G. A. (1993). Metalloids in Wet Deposition on Bermuda - Concentrations, Sources, and Fluxes. *Journal of Geophysical Research-Atmospheres*, 98(D9), 16777-16786.

Dacic, N., Sullivan, J. T., Knowland, K. E., Wolfe, G. M., Oman, L. D., Berkoff, T. A., & Gronoff, G. P. (2019). Evaluation of Nasa's High-Resolution Global Composition Simulations: Understanding a Pollution Event in the Chesapeake Bay During the Summer 2017 Owlets Campaign. *Atmospheric Environment*, 117133. <https://doi.org/10.1016/j.atmosenv.2019.117133>

Davis, J. M., Estis, F. L., Bloomfield, P., & Monahan, J. F. (1991). Complex Principal Component Analysis of Sea-Level Pressure over the Eastern USA. *International Journal of Climatology*, 11(1), 27-54.

Davis, S. R., Talbot, R., Mao, H. T., & Neuman, J. A. (2014). Meteorological Influences on Trace Gas Transport Along the North Atlantic Coast During Icartt 2004. *Atmosphere*, 5(4), 973-1001.

de Gouw, J. A., Goldan, P. D., Warneke, C., Kuster, W. C., Roberts, J. M., Marchewka, M., . . . Keene, W. C. (2003). Validation of Proton Transfer Reaction-Mass Spectrometry (PTR-MS) Measurements of Gas-Phase Organic Compounds in the Atmosphere During the New England Air Quality Study (NEAQS) in 2002. *Journal of Geophysical Research: Atmospheres*, 108(D21). doi:10.1029/2003jd003863

de Gouw, J. A., Middlebrook, A. M., Warneke, C., Goldan, P. D., Kuster, W. C., Roberts, J. M., . . . Bates, T. S. (2005). Budget of Organic Carbon in a Polluted Atmosphere: Results from the New England Air Quality Study in 2002. *Journal of Geophysical Research: Atmospheres*, 110(D16). doi:10.1029/2004jd005623

de Gouw, J. A., Warneke, C., Stohl, A., Wollny, A. G., Brock, C. A., Cooper, O. R., . . . Lueb, A. (2006). Volatile Organic Compounds Composition of Merged and Aged Forest Fire Plumes from Alaska and Western Canada. *Journal of Geophysical Research-Atmospheres*, 111(D10).

De Mello, W. Z., Cooper, D. J., Cooper, W. J., Saltzman, E. S., Zika, R. G., Savoie, D. L., & Prospero, J. M. (1987). Spatial and Diel Variability in the Emissions of Some Biogenic

Sulfur-Compounds from a Florida *Spartina-Alterniflora* Coastal Zone. *Atmospheric Environment*, 21(4), 987-990. doi:10.1016/0004-6981(87)90095-3

DeBell, L. J., Talbot, R. W., Dibb, J. E., Munger, J. W., Fischer, E. V., & Frohking, S. E. (2004A). A Major Regional Air Pollution Event in the Northeastern United States Caused by Extensive Forest Fires in Quebec, Canada. *Journal of Geophysical Research-Atmospheres*, 109(D19). doi:10.1029/2004jd004840

DeBell, L. J., Vozzella, M., Talbot, R. W., & Dibb, J. E. (2004B). Asian Dust Storm Events of Spring 2001 and Associated Pollutants Observed in New England by the Atmospheric Investigation, Regional Modeling, Analysis and Prediction (AIRMAP) Monitoring Network. *Journal of Geophysical Research-Atmospheres*, 109(D1). doi:10.1029/2003jd003733

DeGaetano, A. T., Hirsch, M. E., & Colucci, S. J. (2002). Statistical Prediction of Seasonal East Coast Winter Storm Frequency. *Journal of Climate*, 15(10), 1101-1117. doi:10.1175/1520-0442(2002)015<1101:sposec>2.0.co;2

Dibb, J. E., Talbot, R. W., & Scheuer, E. M. (2000). Composition and Distribution of Aerosols over the North Atlantic During the Subsonic Assessment Ozone and Nitrogen Oxide Experiment (SONEX). *Journal of Geophysical Research-Atmospheres*, 105(D3), 3709-3717.

Dibb, J. E., Scheuer, E., Whitlow, S. I., Vozzella, M., Williams, E., & Lerner, B. M. (2004). Ship-Based Nitric Acid Measurements in the Gulf of Maine During New England Air Quality Study 2002. *Journal of Geophysical Research: Atmospheres*, 109(D20). doi:10.1029/2004jd004843

Dickerson, R. R., Doddridge, B. G., Kelley, P., & Rhoads, K. P. (1995). Large-Scale Pollution of the Atmosphere over the Remote Atlantic-Ocean - Evidence from Bermuda. *Journal of Geophysical Research-Atmospheres*, 100(D5), 8945-8952.

Dickey, T., Frye, D., McNeil, J., Manov, D., Nelson, N., Sigurdson, D., . . . Johnson, R. (1998). Upper-Ocean Temperature Response to Hurricane Felix as Measured by the Bermuda Testbed Mooring. *Monthly Weather Review*, 126(5), 1195-1201. doi:10.1175/1520-0493(1998)126<1195:uotrth>2.0.co;2

Dirks, R. A., Kuettner, J. P., & Moore, J. A. (1988). Genesis of Atlantic Lows Experiment (Gale) - an Overview. *Bulletin of the American Meteorological Society*, 69(2), 148-160.

Doran, J. C., Zhong, S., & Berkowitz, C. M. (1996). Meteorological Factors Affecting Ozone Profiles over the Western North Atlantic. *Journal of Geophysical Research-Atmospheres*, 101(D22), 28701-28710.

Dreessen, J., Orozco, D., Boyle, J., Szymborski, J., Lee, P., Flores, A., & Sakai, R. K. (2019). Observed Ozone over the Chesapeake Bay Land-Water Interface: The Hart-Miller Island Pilot Project. *Journal of the Air & Waste Management Association*, 69(11), 1312-1330. doi:10.1080/10962247.2019.1668497

Driscoll, C. T., Lawrence, G. B., Bulger, A. J., Butler, T. J., Cronan, C. S., Eagar, C., . . . Weathers, K. C. (2001). Acidic Deposition in the Northeastern United States: Sources and Inputs, Ecosystem Effects, and Management Strategies: The Effects of Acidic Deposition in the Northeastern United States Include the Acidification of Soil and Water, Which Stresses Terrestrial and Aquatic Biota. *Bioscience*, 51(3), 180-198. doi:10.1641/0006-3568(2001)051[0180:aditnu]2.0.co;2

- Drury, E., Jacob, D. J., Spurr, R. J. D., Wang, J., Shinozuka, Y., Anderson, B. E., . . . Weber, R. (2010). Synthesis of Satellite (Modis), Aircraft (Icartt), and Surface (Improve, Epa-Aqs, Aeronet) Aerosol Observations over Eastern North America to Improve Modis Aerosol Retrievals and Constrain Surface Aerosol Concentrations and Sources. *Journal of Geophysical Research-Atmospheres*, 115.
- Durkee, P. A., Nielsen, K. E., Smith, P. J., Russell, P. B., Schmid, B., Livingston, J. M., . . . Quinn, P. K. (2000). Regional Aerosol Optical Depth Characteristics from Satellite Observations: ACE-1, TARFOX and ACE-2 Results. *Tellus Series B-Chemical and Physical Meteorology*, 52(2), 484-497.
- Eckhardt, S., Stohl, A., Beirle, S., Spichtinger, N., James, P., Forster, C., . . . Jennings, S. G. (2003). The North Atlantic Oscillation Controls Air Pollution Transport to the Arctic. *Atmospheric Chemistry and Physics*, 3, 1769-1778.
- Ellis, W. G., Arimoto, R., Savoie, D. L., Merrill, J. T., Duce, R. A., & Prospero, J. M. (1993). Aerosol Selenium at Bermuda and Barbados. *Journal of Geophysical Research-Atmospheres*, 98(D7), 12673-12685.
- Engström, A., Bender, F. A. M., Charlson, R. J., & Wood, R. (2015). Geographically Coherent Patterns of Albedo Enhancement and Suppression Associated with Aerosol Sources and Sinks. *Tellus B: Chemical and Physical Meteorology*, 67(1), 26442. doi:10.3402/tellusb.v67.26442
- Ennis, G., & Sievering, H. (1990). Vertical Profile of Elemental Concentrations in Aerosol Particles in the Bermuda Area During GCE/CASE/WATOX. *Global Biogeochemical Cycles*, 4(2), 179-188.
- Evans, M., & Jurewicz, M. L. (2009). Correlations between Analyses and Forecasts of Banded Heavy Snow Ingredients and Observed Snowfall. *Weather and Forecasting*, 24(1), 337-350. doi:10.1175/2008waf2007105.1
- Fairall, C. W., Bradley, E. F., Rogers, D. P., Edson, J. B., & Young, G. S. (1996). Bulk Parameterization of Air-Sea Fluxes for Tropical Ocean Global Atmosphere Coupled Ocean Atmosphere Response Experiment. *Journal of Geophysical Research-Oceans*, 101(C2), 3747-3764. doi:10.1029/95jc03205
- Fairall, C. W., Bradley, E. F., Hare, J. E., Grachev, A. A., & Edson, J. B. (2003). Bulk Parameterization of Air-Sea Fluxes: Updates and Verification for the COARE Algorithm. *Journal of Climate*, 16(4), 571-591. doi:10.1175/1520-0442(2003)016<0571:Bpoasf>2.0.Co;2
- Fairall, C. W., Bariteau, L., Grachev, A. A., Hill, R. J., Wolfe, D. E., Brewer, W. A., . . . Angevine, W. M. (2006). Turbulent Bulk Transfer Coefficients and Ozone Deposition Velocity in the International Consortium for Atmospheric Research into Transport and Transformation. *Journal of Geophysical Research: Atmospheres*, 111(D23). doi:10.1029/2006jd007597
- Farris, B. M., Gronoff, G. P., Carrion, W., Knepp, T., Pippin, M., & Berkoff, T. A. (2019). Demonstration of an Off-Axis Parabolic Receiver for near-Range Retrieval of Lidar Ozone Profiles. *Atmos. Meas. Tech.*, 12(1), 363-370. doi:10.5194/amt-12-363-2019
- Fast, J. D., Berg, L. K., Zhang, K., Easter, R. C., Ferrare, R. A., Hair, J. W., . . . Zelenyuk, A. (2016). Model Representations of Aerosol Layers Transported from North America over the Atlantic Ocean During the Two-Column Aerosol Project. *Journal of Geophysical Research-Atmospheres*, 121(16), 9814-9848. doi:10.1002/2016jd025248



Fast, J. D., & Berkowitz, C. M. (1996). A Modeling Study of Boundary Layer Processes Associated with Ozone Layers Observed During the 1993 North Atlantic Regional Experiment. *Journal of Geophysical Research-Atmospheres*, 101(D22), 28683-28699.

Fast, J. D., & Berkowitz, C. M. (1997). Evaluation of Back Trajectories Associated with Ozone Transport During the 1993 North Atlantic Regional Experiment. *Atmospheric Environment*, 31(6), 825-837.

Fehsenfeld, F. C., Daum, P., Leitch, W. R., Trainer, M., Parrish, D. D., & Hubler, G. (1996). Transport and Processing of O<sub>3</sub> and O<sub>3</sub> Precursors over the North Atlantic: An Overview of the 1993 North Atlantic Regional Experiment (NARE) Summer Intensive. *Journal of Geophysical Research-Atmospheres*, 101(D22), 28877-28891.

Fehsenfeld, F. C., Ancellet, G., Bates, T. S., Goldstein, A. H., Hardesty, R. M., Honrath, R., . . . Zbinden, R. (2006). International Consortium for Atmospheric Research on Transport and Transformation (Icartt): North America to Europe - Overview of the 2004 Summer Field Study. *Journal of Geophysical Research-Atmospheres*, 111(D23).

Feng, J., Chan, E., & Vet, R. (2019). Air Quality in the Eastern United States and Eastern Canada for 1990–2015: 25 Years of Change in Response to Emission Reductions of SO<sub>2</sub> and NO<sub>x</sub> in the Region. *Atmos. Chem. Phys. Discuss.*, 2019, 1-69. doi:10.5194/acp-2019-567

Ferek, R. J., & Hegg, D. A. (1993). Measurements of Dimethyl Sulfide and SO<sub>2</sub> During GTE CITE-3. *Journal of Geophysical Research-Atmospheres*, 98(D12), 23435-23442.

Ferrare, R., Ismail, S., Browell, E., Brackett, V., Clayton, M., Kooi, S., . . . Hobbs, P. V. (2000). Comparison of Aerosol Optical Properties and Water Vapor among Ground and Airborne Lidars and Sun Photometers During Tarfox. *Journal of Geophysical Research-Atmospheres*, 105(D8), 9917-9933.

Fischbeck, G., Bonisch, H., Neumaier, M., Brenninkmeijer, C. A. M., Orphal, J., Brito, J., . . . Zahn, A. (2017). Acetone-CO Enhancement Ratios in the Upper Troposphere Based on 7 Years of CARIBIC Data: New Insights and Estimates of Regional Acetone Fluxes. *Atmospheric Chemistry and Physics*, 17(3), 1985-2008.

Fischer, E. V., Talbot, R. W., Dibb, J. E., Moody, J. L., & Murray, G. L. (2004). Summertime Ozone at Mount Washington: Meteorological Controls at the Highest Peak in the Northeast. *Journal of Geophysical Research-Atmospheres*, 109(D24). doi:10.1029/2004jd004841

Fischer, E., Pszenny, A., Keene, W., Maben, J., Smith, A., Stohl, A., & Talbot, R. (2006). Nitric Acid Phase Partitioning and Cycling in the New England Coastal Atmosphere. *Journal of Geophysical Research-Atmospheres*, 111(D23).

Fishwick, M. P., Sedwick, P. N., Lohan, M. C., Worsfold, P. J., Buck, K. N., Church, T. M., & Ussher, S. J. (2014). The Impact of Changing Surface Ocean Conditions on the Dissolution of Aerosol Iron. *Global Biogeochemical Cycles*, 28(11), 1235-1250.

Fitzgerald, J. W., Hoppel, W. A., & Gelbard, F. (1998). A One-Dimensional Sectional Model to Simulate Multicomponent Aerosol Dynamics in the Marine Boundary Layer - 1. Model Description. *Journal of Geophysical Research-Atmospheres*, 103(D13), 16085-16102. doi:10.1029/98jd01019

Fletcher, J., Mason, S., & Jakob, C. (2016a). The Climatology, Meteorology, and Boundary Layer Structure of Marine Cold Air Outbreaks in Both Hemispheres. *Journal of Climate*, 29(6), 1999-2014. doi:10.1175/jcli-d-15-0268.1

Fletcher, J. K., Mason, S., & Jakob, C. (2016b). A Climatology of Clouds in Marine Cold Air Outbreaks in Both Hemispheres. *Journal of Climate*, 29(18), 6677-6692. doi:10.1175/jcli-d-15-0783.1

Follette-Cook, M. B., Pickering, K. E., Crawford, J. H., Duncan, B. N., Loughner, C. P., Diskin, G. S., . . . Weinheimer, A. J. (2015). Spatial and Temporal Variability of Trace Gas Columns Derived from Wrf/Chem Regional Model Output: Planning for Geostationary Observations of Atmospheric Composition. *Atmospheric Environment*, 118, 28-44. doi:10.1016/j.atmosenv.2015.07.024

Fried, A., Lee, Y. N., Frost, G., Wert, B., Henry, B., Drummond, J. R., . . . Jobson, T. (2002). Airborne CH<sub>2</sub>O Measurements over the North Atlantic During the 1997 NARE Campaign: Instrument Comparisons and Distributions. *Journal of Geophysical Research-Atmospheres*, 107(D4).

Fried, A., Olson, J. R., Walega, J. G., Crawford, J. H., Chen, G., Weibring, P., . . . Millet, D. B. (2008). Role of Convection in Redistributing Formaldehyde to the Upper Troposphere over North America and the North Atlantic During the Summer 2004 Intex Campaign. *Journal of Geophysical Research-Atmospheres*, 113(D17).

Frossard, A. A., Shaw, P. M., Russell, L. M., Kroll, J. H., Canagaratna, M. R., Worsnop, D. R., . . . Bates, T. S. (2011). Springtime Arctic Haze Contributions of Submicron Organic Particles from European and Asian Combustion Sources. *Journal of Geophysical Research-Atmospheres*, 116.

Frossard, A. A., Russell, L. M., Burrows, S. M., Elliott, S. M., Bates, T. S., & Quinn, P. K. (2014). Sources and Composition of Submicron Organic Mass in Marine Aerosol Particles. *Journal of Geophysical Research-Atmospheres*, 119(22), 12977-13003.

Frossard, A. A., Gérard, V., Duplessis, P., Kinsey, J. D., Lu, X., Zhu, Y., . . . Cohen, R. C. (2019a). Properties of Seawater Surfactants Associated with Primary Marine Aerosol Particles Produced by Bursting Bubbles at a Model Air–Sea Interface. *Environmental Science & Technology*, 53(16), 9407-9417. doi:10.1021/acs.est.9b02637

Frossard, A. A., Long, M. S., Keene, W. C., Duplessis, P., Kinsey, J. D., Maben, J. R., . . . Zhu, Y. (2019b). Marine Aerosol Production Via Detrainment of Bubble Plumes Generated in Natural Seawater with a Forced-Air Venturi. *Journal of Geophysical Research: Atmospheres*. doi:10.1029/2019jd030299

Frost, G. J., Fried, A., Lee, Y. N., Wert, B., Henry, B., Drummond, J. R., . . . Williams, J. (2002). Comparisons of Box Model Calculations and Measurements of Formaldehyde from the 1997 North Atlantic Regional Experiment. *Journal of Geophysical Research-Atmospheres*, 107(D7-8).

Frost, G. J., McKeen, S. A., Trainer, M., Ryerson, T. B., Neuman, J. A., Roberts, J. M., . . . Habermann, T. (2006). Effects of Changing Power Plant NO<sub>x</sub> Emissions on Ozone in the Eastern United States: Proof of Concept. *Journal of Geophysical Research: Atmospheres*, 111(D12). doi:10.1029/2005jd006354

Fuelberg, H. E., Hannan, J. R., van Velthoven, P. F. J., Browell, E. V., Bieberbach, G., Knabb, R. D., . . . Selkirk, H. B. (2000). A Meteorological Overview of the Subsonic Assessment Ozone and Nitrogen Oxide Experiment (SONEX) Period. *Journal of Geophysical Research-Atmospheres*, 105(D3), 3633-3651.

- Fuelberg, H. E., Porter, M. J., Kiley, C. M., Halland, J. J., & Morse, D. (2007). Meteorological Conditions and Anomalies During the Intercontinental Chemical Transport Experiment-North America. *Journal of Geophysical Research-Atmospheres*, 112(D12).
- Gall, R. L., & Johnson, D. R. (1971). The Generation of Available Potential Energy by Sensible Heating: A Case Study. *Tellus*, 23, 465-482. doi:10.1111/j.2153-3490.1971.tb00594.x
- Gallagher, M. S., Carsey, T. P., & Farmer, M. L. (1990). Peroxyacetyl Nitrate in the North Atlantic Marine Boundary Layer. *Global Biogeochemical Cycles*, 4(3), 297-308.
- Galloway, J. N., Likens, G. E., & Edgerton, E. S. (1976). Acid Precipitation in Northeastern United-States - Ph and Acidity. *Science*, 194(4266), 722-724. doi:10.1126/science.194.4266.722
- Galloway, J. N., Likens, G. E., Keene, W. C., & Miller, J. M. (1982). The Composition of Precipitation in Remote Areas of the World. *Journal of Geophysical Research-Oceans and Atmospheres*, 87(Nc11), 8771-8786.
- Galloway, J. N., Knap, A. H., & Church, T. M. (1983). The Composition of Western Atlantic Precipitation Using Shipboard Collectors. *Journal of Geophysical Research-Oceans*, 88(Nc15), 859-864.
- Galloway, J. N., Tokos, J. J., Knap, A. H., & Keene, W. C. (1988a). Local Influences on the Composition of Precipitation on Bermuda. *Tellus B: Chemical and Physical Meteorology*, 40(3), 178-188. doi:10.3402/tellusb.v40i3.15905
- Galloway, J. N., Artz, R. S., Dayan, U., Pueschel, R. F., & Boatman, J. F. (1988b). WATOX-85 - an Aircraft and Ground Sampling Program to Determine the Transport of Trace Gases and Aerosols across the Western Atlantic-Ocean. *Atmospheric Environment*, 22(11), 2345-2360.
- Galloway, J. N., Keene, W. C., Artz, R. S., Miller, J. M., Church, T. M., & Knap, A. H. (1989). Processes Controlling the Concentrations of  $\text{SO}_4^{2-}$ ,  $\text{NO}_3^-$ ,  $\text{NH}_4^+$ ,  $\text{H}^+$ ,  $\text{HCOO}^-$  and  $\text{CH}_3\text{COO}^-$  in Precipitation on Bermuda. *Tellus Series B-Chemical and Physical Meteorology*, 41(4), 427-443.
- Galloway, J. N., Keene, W. C., Pszenny, A. A. P., Whelpdale, D. M., Sievering, H., Merrill, J. T., & Boatman, J. F. (1990). Sulfur in the Western North Atlantic Ocean Atmosphere: Results from a Summer 1988 Ship/Aircraft Experiment. *Global Biogeochemical Cycles*, 4(4), 349-365.
- Galloway, J. N., Savoie, D. L., Keene, W. C., & Prospero, J. M. (1993). The Temporal and Spatial Variability of Scavenging Ratios for  $\text{NO}_3^-$  Sulfate, Nitrate, Methanesulfonate and Sodium in the Atmosphere over the North-Atlantic Ocean. *Atmospheric Environment Part a-General Topics*, 27(2), 235-250.
- Galloway, J. N., & Whelpdale, D. M. (1987). Watox-86 Overview and Western North Atlantic Ocean S and N Atmospheric Budgets. *Global Biogeochemical Cycles*, 1(4), 261-281.
- Ganetis, S. A., & Colle, B. A. (2015). The Thermodynamic and Microphysical Evolution of an Intense Snowband During the Northeast U.S. Blizzard of 8–9 February 2013. *Monthly Weather Review*, 143(10), 4104-4125. doi:10.1175/mwr-d-14-00407.1
- Ganguly, D., Ginoux, P., Ramaswamy, V., Dubovik, O., Welton, J., Reid, E. A., & Holben, B. N. (2009). Inferring the Composition and Concentration of Aerosols by Combining AERONET and MPLNET Data: Comparison with Other Measurements and Utilization to

Evaluate GCM Output. *Journal of Geophysical Research-Atmospheres*, 114.  
doi:10.1029/2009jd011895

Garner, G. G., Thompson, A. M., Lee, P., & Martins, D. K. (2015). Evaluation of Naqfc Model Performance in Forecasting Surface Ozone During the 2011 Discover-Aq Campaign. *Journal of Atmospheric Chemistry*, 72(3-4), 483-501. doi:10.1007/s10874-013-9251-z

Garrett, T. J., Avey, L., Palmer, P. I., Stohl, A., Neuman, J. A., Brock, C. A., . . . Holloway, J. S. (2006). Quantifying Wet Scavenging Processes in Aircraft Observations of Nitric Acid and Cloud Condensation Nuclei. *Journal of Geophysical Research: Atmospheres*, 111(D23). doi:10.1029/2006jd007416

Gatebe, C. K., King, M. D., Lyapustin, A. I., Arnold, G. T., & Redemann, J. (2005). Airborne Spectral Measurements of Ocean Directional Reflectance. *Journal of the Atmospheric Sciences*, 62(4), 1072-1092.

Gaudel, A., Cooper, O. R., Ancellet, G., Barret, B., Boynard, A., Burrows, J. P., . . . Ziemke, J. (2018). Tropospheric Ozone Assessment Report: Present-Day Distribution and Trends of Tropospheric Ozone Relevant to Climate and Global Atmospheric Chemistry Model Evaluation. *Elementa-Science of the Anthropocene*, 6. doi:10.1525/elementa.291

Gawor, A., Shunthirasingham, C., Hayward, S. J., Lei, Y. D., Gouin, T., Mmerekki, B. T., . . . Wania, F. (2014). Neutral Polyfluoroalkyl Substances in the Global Atmosphere. *Environmental Science-Processes & Impacts*, 16(3), 404-413.

Geerts, B., & Hobbs, P. V. (1991). Organization and Structure of Clouds and Precipitation on the Mid-Atlantic Coast of the United States. Part Iv: Retrieval of the Thermodynamic and Cloud Microphysical Structures of a Frontal Rainband from Doppler Radar Data. *Journal of the Atmospheric Sciences*, 48(10), 1287-1305. doi:10.1175/1520-0469(1991)048<1287:oasoca>2.0.co;2

Genualdi, S., Lee, S. C., Shoeib, M., Gawor, A., Ahrens, L., & Harner, T. (2010). Global Pilot Study of Legacy and Emerging Persistent Organic Pollutants Using Sorbent-Impregnated Polyurethane Foam Disk Passive Air Samplers. *Environmental Science & Technology*, 44(14), 5534-5539.

Gottelman, A., & Sherwood, S. C. (2016). Processes Responsible for Cloud Feedback. *Current Climate Change Reports*, 2(4), 179-189.

Gichuki, S. W., & Mason, R. P. (2014). Wet and Dry Deposition of Mercury in Bermuda. *Atmospheric Environment*, 87, 249-257.

Gilardoni, S., Russell, L. M., Sorooshian, A., Flagan, R. C., Seinfeld, J. H., Bates, T. S., . . . Worsnop, D. R. (2007). Regional Variation of Organic Functional Groups in Aerosol Particles on Four US East Coast Platforms During the International Consortium for Atmospheric Research on Transport and Transformation 2004 Campaign. *Journal of Geophysical Research-Atmospheres*, 112(D10). doi:10.1029/2006jd007737

Gill, G. A., Guentzel, J. L., Landing, W. M., & Pollman, C. D. (1995). Total Gaseous Mercury Measurements in Florida - the FAMS Project (1992-1994). *Water Air and Soil Pollution*, 80(1-4), 235-244. doi:10.1007/Bf01189673

Gobel, A. R., Altieri, K. E., Peters, A. J., Hastings, M. G., & Sigman, D. M. (2013). Insights into Anthropogenic Nitrogen Deposition to the North Atlantic Investigated Using the

Isotopic Composition of Aerosol and Rainwater Nitrate. *Geophysical Research Letters*, 40(22), 5977-5982.

Goldan, P. D., Kuster, W. C., Williams, E., Murphy, P. C., Fehsenfeld, F. C., & Meagher, J. (2004). Nonmethane Hydrocarbon and Oxy Hydrocarbon Measurements During the 2002 New England Air Quality Study. *Journal of Geophysical Research: Atmospheres*, 109(D21).

doi:10.1029/2003jd004455

Goldberg, D. L., Loughner, C. P., Tzortziou, M., Stehr, J. W., Pickering, K. E., Marufu, L. T., & Dickerson, R. R. (2014). Higher Surface Ozone Concentrations over the Chesapeake Bay than over the Adjacent Land: Observations and Models from the DISCOVER-AQ and CBODAQ Campaigns. *Atmospheric Environment*, 84, 9-19.

doi:10.1016/j.atmosenv.2013.11.008

Gozelska, K., & Galloway, J. N. (1990). Amine Nitrogen in the Atmospheric Environment over the North Atlantic Ocean. *Global Biogeochemical Cycles*, 4(3), 309-333.

Grant, W. B., Browell, E. V., Butler, C. F., Fenn, M. A., Clayton, M. B., Hannan, J. R., . . . Talbot, R. W. (2000). A Case Study of Transport of Tropical Marine Boundary Layer and Lower Tropospheric Air Masses to the Northern Midlatitude Upper Troposphere. *Journal of Geophysical Research-Atmospheres*, 105(D3), 3757-3769.

Gressent, A., Sauvage, B., Defer, E., Patz, H. W., Thomas, K., Holle, R., . . . Volz-Thomas, A. (2014). Lightning NO<sub>x</sub> Influence on Large-Scale NO<sub>y</sub> and O<sub>3</sub> Plumes Observed over the Northern Mid-Latitudes. *Tellus Series B-Chemical and Physical Meteorology*, 66.

doi:10.3402/tellusb.v66.25544

Greybush, S. J., Saslo, S., & Grumm, R. (2017). Assessing the Ensemble Predictability of Precipitation Forecasts for the January 2015 and 2016 East Coast Winter Storms. *Weather and Forecasting*, 32(3), 1057-1078. doi:10.1175/waf-d-16-0153.1

Griffin, R. J., Johnson, C. A., Talbot, R. W., Mao, H. T., Russo, R. S., Zhou, Y., & Sive, B. C. (2004). Quantification of Ozone Formation Metrics at Thompson Farm During the New England Air Quality Study (NEAQS) 2002. *Journal of Geophysical Research-Atmospheres*, 109(D24). doi:10.1029/2004jd005344

Griffin, R. J., Beckman, P. J., Talbot, R. W., Sive, B. C., & Varner, R. K. (2007). Deviations from Ozone Photostationary State During the International Consortium for Atmospheric Research on Transport and Transformation 2004 Campaign: Use of Measurements and Photochemical Modeling to Assess Potential Causes. *Journal of Geophysical Research-Atmospheres*, 112(D10). doi:10.1029/2006jd007604

Griffin, E. M., Schuur, T. J., Ryzhkov, A. V., Reeves, H. D., & Picca, J. C. (2014). A Polarimetric and Microphysical Investigation of the Northeast Blizzard of 8–9 February 2013. *Weather and Forecasting*, 29(6), 1271-1294. doi:10.1175/waf-d-14-00056.1

Gronoff, G., Robinson, J., Berkoff, T., Swap, R., Farris, B., Schroeder, J., . . . Pippin, M. (2019). A Method for Quantifying near Range Point Source Induced O<sub>3</sub> Titration Events Using Co-Located Lidar and Pandora Measurements. *Atmospheric Environment*, 204, 43-52.

doi:10.1016/j.atmosenv.2019.01.052

Grossman, R. L., & Betts, A. K. (1990). Air-Sea Interaction During an Extreme Cold Air Outbreak from the Eastern Coast of the United-States. *Monthly Weather Review*, 118(2), 324-342.

- Guentzel, J. L., Landing, W. M., Gill, G. A., & Pollman, C. D. (1998). Mercury and Major Ions in Rainfall, Throughfall, and Foliage from the Florida Everglades. *Science of the Total Environment*, 213(1-3), 43-51. doi:10.1016/S0048-9697(98)00071-0
- Guentzel, J. L., Landing, W. M., Gill, G. A., & Pollman, C. D. (2001). Processes Influencing Rainfall Deposition of Mercury in Florida. *Environmental Science & Technology*, 35(5), 863-873. doi:10.1021/es001523+
- Guishard, M. P., Evans, J. L., & Hart, R. E. (2009). Atlantic Subtropical Storms. Part II: Climatology. *Journal of Climate*, 22(13), 3574-3594.
- Guishard, M. P., Nelson, E. A., Evans, J. L., Hart, R. E., & O'Connell, D. G. (2007). Bermuda Subtropical Storms. *Meteorology and Atmospheric Physics*, 97(1), 239-253. doi:10.1007/s00703-006-0255-y
- Guo, H., Sullivan, A. P., Campuzano-Jost, P., Schroder, J. C., Lopez-Hilfiker, F. D., Dibb, J. E., . . . Weber, R. J. (2016). Fine Particle Ph and the Partitioning of Nitric Acid During Winter in the Northeastern United States. *Journal of Geophysical Research: Atmospheres*, 121(17), 10,355-310,376. doi:10.1002/2016jd025311
- Guymer, T. H., Businger, J. A., Katsaros, K. B., Shaw, W. J., Taylor, P. K., Large, W. G., & Payne, R. E. (1983). Transfer Processes at the Air Sea Interface. *Philosophical Transactions of the Royal Society a-Mathematical Physical and Engineering Sciences*, 308(1503), 253-273. doi:10.1098/rsta.1983.0003
- Hadlock, R., & Kreitzberg, C. W. (1988). The Experiment on Rapidly Intensifying Cyclones over the Atlantic (ERICA) Field-Study - Objectives and Plans. *Bulletin of the American Meteorological Society*, 69(11), 1309-1320.
- Hains, J. C., Taubman, B. F., Thompson, A. M., Stehr, J. W., Marufu, L. T., Doddridge, B. G., & Dickerson, R. R. (2008). Origins of Chemical Pollution Derived from Mid-Atlantic Aircraft Profiles Using a Clustering Technique. *Atmospheric Environment*, 42(8), 1727-1741.
- Hair, J., Hostetler, C., Hu, Y., Behrenfeld, M., Butler, C., Harper, D., . . . Mack, T. (2016). Combined Atmospheric and Ocean Profiling from an Airborne High Spectral Resolution Lidar. *EPJ Web of Conferences*, 119, 22001.
- Hall, T., & Booth, J. F. (2017). SynthetC: A Statistical Model for Severe Winter Storm Hazard on Eastern North America. *Journal of Climate*, 30(14), 5329-5343. doi:10.1175/jcli-d-16-0711.1
- Halliday, H. S., Thompson, A. M., Kollonige, D. W., & Martins, D. K. (2015). Reactivity and Temporal Variability of Volatile Organic Compounds in the Baltimore/DC Region in July 2011. *Journal of Atmospheric Chemistry*, 72(3-4), 197-213. doi:10.1007/s10874-015-9306-4
- Hansen, A. D. A., Artz, R. S., Pszenny, A. A. P., & Larson, R. E. (1990). Aerosol Black Carbon and Radon as Tracers for Air Mass Origin over the North Atlantic Ocean. *Global Biogeochemical Cycles*, 4(2), 189-199.
- Hansen, A. D. A., & Novakov, T. (1988). Aerosol Black Carbon Measurements over the Western Atlantic Ocean. *Global Biogeochemical Cycles*, 2(1), 41-45.
- Harner, T., Pozo, K., Gouin, T., Macdonald, A. M., Hung, H., Cainey, J., & Peters, A. (2006). Global Pilot Study for Persistent Organic Pollutants (POPS) Using PUF Disk Passive Air Samplers. *Environmental Pollution*, 144(2), 445-452.

- Harriss, R. C., Browell, E. V., Sebacher, D. I., Gregory, G. L., Hinton, R. R., Beck, S. M., . . . Shipley, S. T. (1984). Atmospheric Transport of Pollutants from North-America to the North-Atlantic Ocean. *Nature*, 308(5961), 722-724.
- Hartley, W. S., & Hobbs, P. V. (2001). An Aerosol Model and Aerosol-Induced Changes in the Clear-Sky Albedo Off the East Coast of the United States. *Journal of Geophysical Research-Atmospheres*, 106(D9), 9733-9748.
- Hartley, W. S., Hobbs, P. V., Ross, J. L., Russell, P. B., & Livingston, J. M. (2000). Properties of Aerosols Aloft Relevant to Direct Radiative Forcing Off the Mid-Atlantic Coast of the United States. *Journal of Geophysical Research-Atmospheres*, 105(D8), 9859-9885.
- Haskins, J. D., Lee, B. H., Lopez-Hilifiker, F. D., Peng, Q., Jaegle, L., Reeves, J. M., . . . Thornton, J. A. (2019). Observational Constraints on the Formation of Cl<sub>2</sub> from the Reactive Uptake of ClNO<sub>2</sub> on Aerosols in the Polluted Marine Boundary Layer. *Journal of Geophysical Research: Atmospheres*, 0(ja). doi:10.1029/2019jd030627
- Hastie, D. R., Malle, S., Toom, D. L., Whelpdale, D. M., Keene, W. C., Galloway, J. N., . . . Pszenny, A. A. P. (1990). Inorganic Nitrogen over the Western North Atlantic Ocean. *Global Biogeochemical Cycles*, 4(3), 267-278.
- Hastie, D. R., Schiff, H. I., Whelpdale, D. M., Peterson, R. E., Zoller, W. H., Anderson, D. L., & Church, T. M. (1988a). Description and Intercomparison of Techniques to Measure N-Compound and S-Compound in the Western Atlantic-Ocean Experiment. *Atmospheric Environment*, 22(11), 2393-2399. doi:10.1016/0004-6981(88)90471-4
- Hastie, D. R., Schiff, H. I., Whelpdale, D. M., Peterson, R. E., Zoller, W. H., & Anderson, D. L. (1988b). Nitrogen and Sulfur over the Western Atlantic-Ocean. *Atmospheric Environment*, 22(11), 2381-2391. doi:10.1016/0004-6981(88)90470-2
- Hastings, M. G., Sigman, D. M., & Lipschultz, F. (2003). Isotopic Evidence for Source Changes of Nitrate in Rain at Bermuda. *Journal of Geophysical Research-Atmospheres*, 108(D24).
- He, H., Loughner, C. P., Stehr, J. W., Arkinson, H. L., Brent, L. C., Follette-Cook, M. B., . . . Dickerson, R. R. (2014). An Elevated Reservoir of Air Pollutants over the Mid-Atlantic States During the 2011 DISCOVER-AQ Campaign: Airborne Measurements and Numerical Simulations. *Atmospheric Environment*, 85, 18-30. doi:10.1016/j.atmosenv.2013.11.039
- Heald, C. L., Jacob, D. J., Turquety, S., Hudman, R. C., Weber, R. J., Sullivan, A. P., . . . Seinfeld, J. H. (2006). Concentrations and Sources of Organic Carbon Aerosols in the Free Troposphere over North America. *Journal of Geophysical Research-Atmospheres*, 111(D23). doi:10.1029/2006jd007705
- Hegarty, J., Mao, H., & Talbot, R. (2010). Winter- and Summertime Continental Influences on Tropospheric O<sub>3</sub> and CO Observed by TES over the Western North Atlantic Ocean. *Atmospheric Chemistry and Physics*, 10(8), 3723-3741. doi:10.5194/acp-10-3723-2010
- Hegarty, J. D., Lewis, J., McGrath-Spangler, E. L., Henderson, J., Scarino, A. J., DeCola, P., . . . Welton, E. J. (2018). Analysis of the Planetary Boundary Layer Height During Discover-Aq Baltimore-Washington, DC with Lidar and High-Resolution WRF Modeling. *Journal of Applied Meteorology and Climatology*, 57(11), 2679-2696. doi:10.1175/Jamc-D-18-0014.1

Hegg, D. A., Hobbs, P. V., Ferek, R. J., & Waggoner, A. P. (1995). Measurements of Some Aerosol Properties Relevant to Radiative Forcing on the East-Coast of the United-States. *Journal of Applied Meteorology*, 34(10), 2306-2315.

Hegg, D. A., Livingston, J., Hobbs, P. V., Novakov, T., & Russell, P. (1997). Chemical Apportionment of Aerosol Column Optical Depth Off the Mid-Atlantic Coast of the United States. *Journal of Geophysical Research-Atmospheres*, 102(D21), 25293-25303.

Heikes, B. G., Walega, J. G., Kok, G. L., Lind, J. A., & Lazrus, A. L. (1988). Measurements of H<sub>2</sub>O<sub>2</sub> During WATOX-86. *Global Biogeochemical Cycles*, 2(1), 57-61.

Heintzenberg, J., Hermann, M., Weigelt, A., Clarke, A., Kapustin, V., Anderson, B., . . . Brenninkmeijer, C. (2011). Near-Global Aerosol Mapping in the Upper Troposphere and Lowermost Stratosphere with Data from the Caribic Project. *Tellus Series B-Chemical and Physical Meteorology*, 63(5), 875-890.

Helmig, D., Lang, E. K., Bariteau, L., Boylan, P., Fairall, C. W., Ganzeveld, L., . . . Pallandt, M. (2012). Atmosphere-Ocean Ozone Fluxes During the TexAQS 2006, STRATUS 2006, GOMECC 2007, GASEX 2008, and AMMA 2008 Cruises. *Journal of Geophysical Research: Atmospheres*, 117(D4). doi:10.1029/2011jd015955

Hermann, M., Brenninkmeijer, C. A. M., Slemr, F., Heintzenberg, J., Martinsson, B. G., Schlager, H., . . . Ziereis, H. (2008). Submicrometer Aerosol Particle Distributions in the Upper Troposphere over the Mid-Latitude North Atlantic - Results from the Third Route of 'CARIBIC'. *Tellus Series B-Chemical and Physical Meteorology*, 60(1), 106-117.

Hernandez, M. D. A., Burkert, J., Reichert, L., Stobener, D., Meyer-Arne, J., Burrows, J. P., . . . Doddridge, B. G. (2001). Marine Boundary Layer Peroxy Radical Chemistry During the Aerosols99 Campaign: Measurements and Analysis. *Journal of Geophysical Research-Atmospheres*, 106(D18), 20833-20846.

Herndon, S. C., Zahniser, M. S., Nelson Jr., D. D., Shorter, J., McManus, J. B., Jiménez, R., . . . de Gouw, J. A. (2007). Airborne Measurements of HCHO and HCOOH During the New England Air Quality Study 2004 Using a Pulsed Quantum Cascade Laser Spectrometer. *Journal of Geophysical Research: Atmospheres*, 112(D10). doi:10.1029/2006jd007600

Hignett, P., Taylor, J. P., Francis, P. N., & Glew, M. D. (1999). Comparison of Observed and Modeled Direct Aerosol Forcing During Tarfox. *Journal of Geophysical Research-Atmospheres*, 104(D2), 2279-2287.

Hirsch, M. E., DeGaetano, A. T., & Colucci, S. J. (2001). An East Coast Winter Storm Climatology. *Journal of Climate*, 14(5), 882-899. doi:10.1175/1520-0442(2001)014<0882:aecwsc>2.0.co;2

Hirsch, A. I., Michalak, A. M., Bruhwiler, L. M., Peters, W., Dlugokencky, E. J., & Tans, P. P. (2006). Inverse Modeling Estimates of the Global Nitrous Oxide Surface Flux from 1998-2001. *Global Biogeochemical Cycles*, 20(1).

Hitchcock, G. L., Olson, D. B., Knauer, G. A., Pszenny, A. A. P., & Galloway, J. N. (1990). Horizontal Diffusion and New Production in the Sargasso Sea. *Global Biogeochemical Cycles*, 4(3), 253-265.

Hobbs, P. V. (1999). An Overview of the University of Washington Airborne Measurements and Results from the Tropospheric Aerosol Radiative Forcing Observational Experiment (Tarfox). *Journal of Geophysical Research-Atmospheres*, 104(D2), 2233-2238.



- Hoell Jr., J. M., Davis, D. D., Gregory, G. L., McNeal, R. J., Bendura, R. J., Drewry, J. W., . . . Owen, D. W. (1993). Operational Overview of the NASA GTE/CITE 3 Airborne Instrument Intercomparisons for Sulfur Dioxide, Hydrogen Sulfide, Carbonyl Sulfide, Dimethyl Sulfide, and Carbon Disulfide. *Journal of Geophysical Research: Atmospheres*, 98(D12), 23291-23304. doi:10.1029/93jd00453
- Hoffman, E. J., & Duce, R. A. (1976). Factors Influencing the Organic Carbon Content of Marine Aerosols: A Laboratory Study. *Journal of Geophysical Research (1896-1977)*, 81(21), 3667-3670. doi:10.1029/JC081i021p03667
- Hoffman, E. J., & Duce, R. A. (1977). Organic Carbon in Marine Atmospheric Particulate Matter: Concentration and Particle Size Distribution. *Geophysical Research Letters*, 4(10), 449-452. doi:10.1029/GL004i010p00449
- Hoffman, E. J., Hoffman, G. L., Fletcher, I. S., & Duce, R. A. (1977). Further Consideration of Alkali and Alkaline-Earth Geochemistry of Marine Aerosols - Results of a Study of Marine Aerosols Collected on Bermuda. *Atmospheric Environment*, 11(4), 373-377.
- Holmes, C. W., & Miller, R. (2004). Atmospherically Transported Elements and Deposition in the Southeastern United States: Local or Transoceanic? *Applied Geochemistry*, 19(7), 1189-1200.
- Hoppel, W. A., Larson, R., & Vietti, M. A. (1984). Aerosol Size Distributions at a Site on the East Coast of the United-States. *Atmospheric Environment*, 18(8), 1613-1621.
- Hoppel, W. A., Fitzgerald, J. W., & Larson, R. E. (1985). Aerosol Size Distributions in Air Masses Advecting Off the East Coast of the United-States. *Journal of Geophysical Research-Atmospheres*, 90(Nd1), 2365-2379.
- Hu, L., Yvon-Lewis, S. A., Liu, Y., Salisbury, J. E., & O'Hern, J. E. (2010). Coastal Emissions of Methyl Bromide and Methyl Chloride Along the Eastern Gulf of Mexico and the East Coast of the United States. *Global Biogeochemical Cycles*, 24. doi:10.1029/2009gb003514
- Huang, C. Y., & Raman, S. (1991). Numerical-Simulation of January 28 Cold Air Outbreak During Gale .2. The Mesoscale Circulation and Marine Boundary-Layer. *Boundary-Layer Meteorology*, 56(1-2), 51-81.
- Huang, C. Y., & Raman, S. (1992). A 3-Dimensional Numerical Investigation of a Carolina Coastal Front and the Gulf-Stream Rainband. *Journal of the Atmospheric Sciences*, 49(7), 560-584.
- Huang, S. L., Arimoto, R., & Rahn, K. A. (1996). Changes in Atmospheric Lead and Other Pollution Elements at Bermuda. *Journal of Geophysical Research-Atmospheres*, 101(D15), 21033-21040.
- Huang, S., Rahn, K. A., & Arimoto, R. (1997). A Graphical Method for Determining the Dry-Depositional Component of Aerosol Samples and Their Field Blanks. *Atmospheric Environment*, 31(20), 3383-3394.
- Huang, S. L., Rahn, K. A., Arimoto, R., Graustein, W. C., & Turekian, K. K. (1999). Semiannual Cycles of Pollution at Bermuda. *Journal of Geophysical Research-Atmospheres*, 104(D23), 30309-30317.
- Hudman, R. C., Jacob, D. J., Turquety, S., Leibensperger, E. M., Murray, L. T., Wu, S., . . . Wooldridge, P. J. (2007). Surface and Lightning Sources of Nitrogen Oxides over the United

States: Magnitudes, Chemical Evolution, and Outflow. *Journal of Geophysical Research-Atmospheres*, 112(D12).

Hudman, R. C., Murray, L. T., Jacob, D. J., Millet, D. B., Turquety, S., Wu, S., . . . Sachse, G. W. (2008). Biogenic Versus Anthropogenic Sources of CO in the United States. *Geophysical Research Letters*, 35(4). doi:10.1029/2007gl032393

Huntrieser, H., Heland, J., Schlager, H., Forster, C., Stohl, A., Aufmhoff, H., . . . Cooper, O. (2005). Intercontinental Air Pollution Transport from North America to Europe: Experimental Evidence from Airborne Measurements and Surface Observations. *Journal of Geophysical Research-Atmospheres*, 110(D1).

Hurrell, J. W. (1995). Decadal Trends in the North-Atlantic Oscillation - Regional Temperatures and Precipitation. *Science*, 269(5224), 676-679.

Husar, R. B., Holloway, J. M., Patterson, D. E., & Wilson, W. E. (1981). Spatial and Temporal Pattern of Eastern-United-States Haze - a Summary. *Atmospheric Environment*, 15(10-1), 1919-1928.

Husar, R. B., Prospero, J. M., & Stowe, L. L. (1997). Characterization of Tropospheric Aerosols over the Oceans with the NOAA Advanced Very High Resolution Radiometer Optical Thickness Operational Product. *Journal of Geophysical Research-Atmospheres*, 102(D14), 16889-16909. doi:10.1029/96jd04009

Hutter, A. R., Larsen, R. J., Maring, H., & Merrill, J. T. (1995). Rn-222 at Bermuda and Mauna-Loa - Local and Distant Sources. *Journal of Radioanalytical and Nuclear Chemistry-Articles*, 193(2), 309-318.

Ichiye, T., & Zipser, E. J. (1967). An Example of Heat Transfer at the Air Sea Boundary over the Gulf Stream During a Cold Air Outbreak. *J. Meteor. Soc. Japan*, 45, 261-270.

Ignatov, A. M., Stowe, L. L., Sakerin, S. M., & Korotaev, G. K. (1995). Validation of the NOAA/NESDIS Satellite Aerosol Product over the North-Atlantic in 1989. *Journal of Geophysical Research-Atmospheres*, 100(D3), 5123-5132.

Ismail, S., Browell, E. V., Ferrare, R. A., Kooi, S. A., Clayton, M. B., Brackett, V. G., & Russell, P. B. (2000). Laser Measurements of Aerosol and Water Vapor Profiles During TARFOX. *Journal of Geophysical Research-Atmospheres*, 105(D8), 9903-9916.

Jeker, D. P., Pfister, L., Thompson, A. M., Brunner, D., Boccippio, D. J., Pickering, K. E., . . . Staehelin, J. (2000). Measurements of Nitrogen Oxides at the Tropopause: Attribution to Convection and Correlation with Lightning. *Journal of Geophysical Research-Atmospheres*, 105(D3), 3679-3700. doi:10.1029/1999jd901053

Jickells, T. D., Knap, A., Church, T., Galloway, J., & Miller, J. (1982). Acid-Rain on Bermuda. *Nature*, 297(5861), 55-57. Jickells, T. D., Deuser, W. G., & Belastock, R. A. (1990). Temporal Variations in the Concentrations of Some Particulate Elements in the Surface Waters of the Sargasso Sea and Their Relationship to Deep-Sea Fluxes. *Marine Chemistry*, 29(2-3), 203-219.

Jickells, T. D., Church, T. M., Scudlark, J. R., & Dehairs, F. (1992). Barium in North-Atlantic Rain Water - a Reconnaissance. *Atmospheric Environment Part a-General Topics*, 26(14), 2641-2646.

- Jickells, T. D., Church, T., Veron, A., & Arimoto, R. (1994). Atmospheric Inputs of Manganese and Aluminum to the Sargasso Sea and Their Relation to Surface-Water Concentrations. *Marine Chemistry*, 46(3), 283-292.
- Jickells, T. D., Dorling, S., Deuser, W. G., Church, T. M., Arimoto, R., & Prospero, J. M. (1998). Air-Borne Dust Fluxes to a Deep Water Sediment Trap in the Sargasso Sea. *Global Biogeochemical Cycles*, 12(2), 311-320.
- Jimenez, R., Herndon, S., Shorter, J. H., Nelson, D. D., McManus, J. B., & Zahniser, M. S. (2005). Atmospheric Trace Gas Measurements Using a Dual Quantum-Cascade Laser Mid-Infrared Absorption Spectrometer (Vol. 5738): SPIE.
- Jin, Z. H., Charlock, T. P., & Rutledge, K. (2002). Analysis of Broadband Solar Radiation and Albedo over the Ocean Surface at Cove. *Journal of Atmospheric and Oceanic Technology*, 19(10), 1585-1601.
- Jin, Z. H., Charlock, T. P., Smith, W. L., & Rutledge, K. (2004). A Parameterization of Ocean Surface Albedo. *Geophysical Research Letters*, 31(22).
- Jin, Z. H., Charlock, T. P., Rutledge, K., Cota, G., Kahn, R., Redemann, J., . . . Rose, F. (2005). Radiative Transfer Modeling for the Clams Experiment. *Journal of the Atmospheric Sciences*, 62(4), 1053-1071. doi:10.1175/Jas3351.1
- Jones, T. A., Christopher, S. A., & Quaas, J. (2009). A Six Year Satellite-Based Assessment of the Regional Variations in Aerosol Indirect Effects. *Atmospheric Chemistry and Physics*, 9(12), 4091-4114.
- Jongeward, A. R., Li, Z. Q., He, H., & Xiong, X. X. (2016). Natural and Anthropogenic Aerosol Trends from Satellite and Surface Observations and Model Simulations over the North Atlantic Ocean from 2002 to 2012. *Journal of the Atmospheric Sciences*, 73(11), 4469-4485. doi:10.1175/Jas-D-15-0308.1
- Jordan, C. E., Talbot, R. W., & Keim, B. D. (2000). Water-Soluble Nitrogen at the New Hampshire Sea Coast: Hno<sub>3</sub>, Aerosols, Precipitation, and Fog. *Journal of Geophysical Research: Atmospheres*, 105(D21), 26403-26431. doi:10.1029/2000jd900298
- Kacenelenbogen, M., Vaughan, M. A., Redemann, J., Hoff, R. M., Rogers, R. R., Ferrare, R. A., . . . Holben, B. N. (2011). An Accuracy Assessment of the CALIOP/CALIPSO Version 2/Version 3 Daytime Aerosol Extinction Product Based on a Detailed Multi-Sensor, Multi-Platform Case Study. *Atmospheric Chemistry and Physics*, 11(8), 3981-4000. doi:10.5194/acp-11-3981-2011
- Kadko, D., & Prospero, J. (2011). Deposition of Be-7 to Bermuda and the Regional Ocean: Environmental Factors Affecting Estimates of Atmospheric Flux to the Ocean. *Journal of Geophysical Research-Oceans*, 116.
- Kadko, D., Landing, W. M., & Shelley, R. U. (2015). A Novel Tracer Technique to Quantify the Atmospheric Flux of Trace Elements to Remote Ocean Regions. *Journal of Geophysical Research-Oceans*, 120(2), 848-858.
- Kahn, R., Li, W. H., Martonchik, J. V., Bruegge, C. J., Diner, D. J., Gaitley, B. J., . . . Clark, D. (2005). Misr Calibration and Implications for Low-Light-Level Aerosol Retrieval over Dark Water. *Journal of the Atmospheric Sciences*, 62(4), 1032-1052.
- Kassianov, E., Chand, D., Berg, L., Fast, J., Tomlinson, J., Ferrare, R., . . . Hair, J. (2012). Multi-Year Satellite and Surface Observations of Aod in Support of Two-Column

Aerosol Project (TCAP) Field Campaign. Remote Sensing of Clouds and the Atmosphere Xvii; and Lidar Technologies, Techniques, and Measurements for Atmospheric Remote Sensing Viii, 8534. doi:10.1117/12.977862

Kassianov, E., Barnard, J., Pekour, M., Berg, L. K., Shilling, J., Flynn, C., . . . Jefferson, A. (2014). Simultaneous Retrieval of Effective Refractive Index and Density from Size Distribution and Light-Scattering Data: Weakly Absorbing Aerosol. *Atmos. Meas. Tech.*, 7(10), 3247-3261. doi:10.5194/amt-7-3247-2014

Kassianov, E., Berg, L. K., Pekour, M., Barnard, J., Chand, D., Flynn, C., . . . Fast, J. (2015). Airborne Aerosol in Situ Measurements During TCAP: A Closure Study of Total Scattering. *Atmosphere*, 6(8), 1069-1101.

Kassianov, E., Berg, L. K., Pekour, M., Barnard, J., Chand, D., Comstock, J., . . . Fast, J. (2018). A Closure Study of Total Scattering Using Airborne in Situ Measurements from the Winter Phase of Tcap. *Atmosphere*, 9(6).

Kato, S., Loeb, N. G., & Rutledge, C. K. (2002). Estimate of Top-of-Atmosphere Albedo for a Molecular Atmosphere over Ocean Using Clouds and the Earth's Radiant Energy System Measurements. *Journal of Geophysical Research-Atmospheres*, 107(D19).

Kaufman, Y. J., Koren, I., Remer, L. A., Rosenfeld, D., & Rudich, Y. (2005). The Effect of Smoke, Dust, and Pollution Aerosol on Shallow Cloud Development over the Atlantic Ocean. *Proceedings of the National Academy of Sciences of the United States of America*, 102(32), 11207-11212. doi:10.1073/pnas.0505191102

Kawamura, K., Hoque, M. M. M., Bates, T. S., & Quinn, P. K. (2017). Molecular Distributions and Isotopic Compositions of Organic Aerosols over the Western North Atlantic: Dicarboxylic Acids, Related Compounds, Sugars, and Secondary Organic Aerosol Tracers. *Organic Geochemistry*, 113, 229-238.

Keene, W. C., & Savoie, D. L. (1998). The Ph of Deliquesced Sea-Salt Aerosol in Polluted Marine Air. *Geophysical Research Letters*, 25(12), 2181-2184.

Keene, W. C., Pszenny, A. A. P., Galloway, J. N., & Hawley, M. E. (1986). Sea-Salt Corrections and Interpretation of Constituent Ratios in Marine Precipitation. *Journal of Geophysical Research-Atmospheres*, 91(D6), 6647-6658.

Keene, W. C., Pszenny, A. A. P., Jacob, D. J., Duce, R. A., Galloway, J. N., Schultz-Tokos, J. J., . . . Boatman, J. F. (1990). The Geochemical Cycling of Reactive Chlorine through the Marine Troposphere. *Global Biogeochemical Cycles*, 4(4), 407-430.

Keene, W. C., Maben, J. R., Pszenny, A. A. P., & Galloway, J. N. (1993). Measurement Technique for Inorganic Chlorine Gases in the Marine Boundary Layer. *Environmental Science & Technology*, 27(5), 866-874. doi:10.1021/es00042a008

Keene, W. C., Pszenny, A. A. P., Maben, J. R., & Sander, R. (2002a). Variation of Marine Aerosol Acidity with Particle Size. *Geophysical Research Letters*, 29(7).

Keene, W. C., Montag, J. A., Maben, J. R., Southwell, M., Leonard, J., Church, T. M., . . . Galloway, J. N. (2002b). Organic Nitrogen in Precipitation over Eastern North America. *Atmospheric Environment*, 36(28), 4529-4540. doi:10.1016/S1352-2310(02)00403-X

Keene, W. C., Pszenny, A. A. P., Maben, J. R., Stevenson, E., & Wall, A. (2004). Closure Evaluation of Size-Resolved Aerosol Ph in the New England Coastal Atmosphere

During Summer. *Journal of Geophysical Research: Atmospheres*, 109(D23).

doi:10.1029/2004jd004801

Keene, W. C., Maring, H., Maben, J. R., Kieber, D. J., Pszenny, A. A. P., Dahl, E. E., . . . Sander, R. (2007a). Chemical and Physical Characteristics of Nascent Aerosols Produced by Bursting Bubbles at a Model Air-Sea Interface. *Journal of Geophysical Research-Atmospheres*, 112(D21). doi:10.1029/2007jd008464

Keene, W. C., Stutz, J., Pszenny, A. A. P., Maben, J. R., Fischer, E. V., Smith, A. M., . . . Varner, R. K. (2007b). Inorganic Chlorine and Bromine in Coastal New England Air During Summer. *Journal of Geophysical Research-Atmospheres*, 112(D10).

Keene, W. C., Moody, J. L., Galloway, J. N., Prospero, J. M., Cooper, O. R., Eckhardt, S., & Maben, J. R. (2014). Long-Term Trends in Aerosol and Precipitation Composition over the Western North Atlantic Ocean at Bermuda. *Atmospheric Chemistry and Physics*, 14(15), 8119-8135.

Keene, W. C., Galloway, J. N., Likens, G. E., Deviney, F. A., Mikkelsen, K. N., Moody, J. L., & Maben, J. R. (2015). Atmospheric Wet Deposition in Remote Regions: Benchmarks for Environmental Change. *Journal of the Atmospheric Sciences*, 72(8), 2947-2978.

Keene, W. C., Long, M. S., Reid, J. S., Frossard, A. A., Kieber, D. J., Maben, J. R., . . . Bates, T. S. (2017). Factors That Modulate Properties of Primary Marine Aerosol Generated from Ambient Seawater on Ships at Sea. *Journal of Geophysical Research-Atmospheres*, 122(21), 11961-11990. doi:10.1002/2017jd026872

Keim, B. D., Meeker, L. D., & Slater, J. F. (2005). Manual Synoptic Climate Classification for the East Coast of New England (USA) with an Application to Pm2.5 Concentration. *Climate Research*, 28(2), 143-154.

Kelleher, T. J., & Feder, W. A. (1978). Phytotoxic Concentrations of Ozone on Nantucket Island - Long-Range Transport from Middle Atlantic States over Open Ocean Confirmed by Bioassay with Ozone-Sensitive Tobacco Plants. *Environmental Pollution*, 17(3), 187-194.

Kessner, A. L., Wang, J., Levy, R. C., & Colarco, P. R. (2013). Remote Sensing of Surface Visibility from Space: A Look at the United States East Coast. *Atmospheric Environment*, 81, 136-147.

Khalil, M. A. K., & Rasmussen, R. A. (1988). Trace Gases over the Western Atlantic Ocean: Fluxes from the Eastern United States and Distributions in and above the Planetary Boundary Layer. *Global Biogeochemical Cycles*, 2(1), 63-71.

Kieber, R. J., Rhines, M. F., Willey, J. D., & Avery, G. B. (1999). Nitrite Variability in Coastal North Carolina Rainwater and Its Impact on the Nitrogen Cycle in Rain. *Environmental Science & Technology*, 33(3), 373-377. doi:10.1021/es980655o

Kieber, D. J., Keene, W. C., Frossard, A. A., Long, M. S., Maben, J. R., Russell, L. M., . . . Bates, T. S. (2016). Coupled Ocean-Atmosphere Loss of Marine Refractory Dissolved Organic Carbon. *Geophysical Research Letters*, 43(6), 2765-2772. doi:10.1002/2016gl068273

Kim, Y., Sievering, H., & Boatman, J. (1990). Volume and Surface Area Size Distribution, Water Mass and Model Fitting of GCE/CASE/WATOX Marine Aerosols. *Global Biogeochemical Cycles*, 4(2), 165-177.

Kim, G., Alleman, L. Y., & Church, T. M. (1999). Atmospheric Depositional Fluxes of Trace Elements, Pb-210, and Be-7 to the Sargasso Sea. *Global Biogeochemical Cycles*, 13(4), 1183-1192.

Kim, S. Y., Talbot, R., Mao, H., Blake, D., Vay, S., & Fuelberg, H. (2008). Continental Outflow from the Us to the Upper Troposphere over the North Atlantic During the NASA INTEX-NA Airborne Campaign. *Atmospheric Chemistry and Physics*, 8(7), 1989-2005.

Kim, H., Lee, D. E., & Ducklow, H. W. (2019). Winter Extratropical Cyclones as a Potential Driver of a Long-Term Decline of Bacterial Production in the Sargasso Sea near Bermuda. *Geophysical Research Letters*, 46(10), 5404-5412. doi:10.1029/2018gl081243

Kleinman, L. I., Daum, P. H., Lee, J. H., Lee, N. Y., Weinstein-Lloyd, J., & Springston, S. R. (1998). Photochemistry of O<sub>3</sub> and Related Compounds over Southern Nova Scotia. *Journal of Geophysical Research-Atmospheres*, 103(D11), 13519-13529.

Knapp, K. G., Balsley, B. B., Jensen, M. L., Hanson, H. P., & Birks, J. W. (1998a). Observation of the Transport of Polluted Air Masses from the Northeastern United States to Cape Sable Island, Nova Scotia, Canada, During the 1993 Nare Summer Intensive. *Journal of Geophysical Research-Atmospheres*, 103(D11), 13399-13411.

Knapp, K. G., Jensen, M. L., Balsley, B. B., Bognar, J. A., Oltmans, S. J., Smith, T. W., & Birks, J. W. (1998b). Vertical Profiling Using a Complementary Kite and Tethered Balloon Platform at Ferryland Downs, Newfoundland, Canada: Observation of a Dry, Ozone-Rich Plume in the Free Troposphere. *Journal of Geophysical Research-Atmospheres*, 103(D11), 13389-13397.

Knapp, A. N., Hastings, M. G., Sigman, D. M., Lipschultz, F., & Galloway, J. N. (2010). The Flux and Isotopic Composition of Reduced and Total Nitrogen in Bermuda Rain. *Marine Chemistry*, 120(1-4), 83-89.

Knepp, T., Pippin, M., Crawford, J., Chen, G., Szykman, J., Long, R., . . . Neil, D. (2015). Estimating Surface NO<sub>2</sub> and SO<sub>2</sub> Mixing Ratios from Fast-Response Total Column Observations and Potential Application to Geostationary Missions. *Journal of Atmospheric Chemistry*, 72(3-4), 261-286. doi:10.1007/s10874-013-9257-6

Koblizkova, M., Genualdi, S., Lee, S. C., & Harner, T. (2012a). Application of Sorbent Impregnated Polyurethane Foam (Sip) Disk Passive Air Samplers for Investigating Organochlorine Pesticides and Polybrominated Diphenyl Ethers at the Global Scale. *Environmental Science & Technology*, 46(1), 391-396.

Koblizkova, M., Lee, S. C., & Harner, T. (2012b). Sorbent Impregnated Polyurethane Foam Disk Passive Air Samplers for Investigating Current-Use Pesticides at the Global Scale. *Atmospheric Pollution Research*, 3(4), 456-462.

Koch, J., McKinley, G. A., Bennington, V., & Ullman, D. (2009). Do Hurricanes Cause Significant Interannual Variability in the Air-Sea CO<sub>2</sub> Flux of the Subtropical North Atlantic? *Geophysical Research Letters*, 36(7). doi:10.1029/2009gl037553

Kopcewicz, B., Nagamoto, C., Parungo, F., Harris, J., Miller, J., Sievering, H., & Rosinski, J. (1991). Morphological Studies of Sulfate and Nitrate Particles on the East Coast of North America and over the North Atlantic Ocean. *Atmospheric Research*, 26(3), 245-271.

Kotchenruther, R. A., Hobbs, P. V., & Hegg, D. A. (1999). Humidification Factors for Atmospheric Aerosols Off the Mid-Atlantic Coast of the United States. *Journal of Geophysical Research-Atmospheres*, 104(D2), 2239-2251.

Krabbenhoft, D. P., Hurley, J. P., Olson, M. L., & Cleckner, L. B. (1998). Diel Variability of Mercury Phase and Species Distributions in the Florida Everglades. *Biogeochemistry*, 40(2-3), 311-325. doi:10.1023/A:1005938607225

Kratz, D. P., Gupta, S. K., Wilber, A. C., & Sothcott, V. E. (2010). Validation of the Ceres Edition 2b Surface-Only Flux Algorithms. *Journal of Applied Meteorology and Climatology*, 49(1), 164-180.

Kumjian, M. R., & Lombardo, K. A. (2017). Insights into the Evolving Microphysical and Kinematic Structure of Northeastern U.S. Winter Storms from Dual-Polarization Doppler Radar. *Monthly Weather Review*, 145(3), 1033-1061. doi:10.1175/mwr-d-15-0451.1

Lackmann, G. M., Keyser, D., & Bosart, L. F. (1997). A Characteristic Life Cycle of Upper-Tropospheric Cyclogenetic Precursors During the Experiment on Rapidly Intensifying Cyclones over the Atlantic (ERICA). *Monthly Weather Review*, 125(11), 2729-2758.

Lackmann, G. M., Keyser, D., & Bosart, L. F. (1999). Energetics of an Intensifying Jet Streak During the Experiment on Rapidly Intensifying Cyclones over the Atlantic (ERICA). *Monthly Weather Review*, 127(12), 2777-2795.

Lamer, K., Tatarevic, A., Jo, I., & Kollias, P. (2014). Evaluation of Gridded Scanning Arm Cloud Radar Reflectivity Observations and Vertical Doppler Velocity Retrievals. *Atmos. Meas. Tech.*, 7(4), 1089-1103. doi:10.5194/amt-7-1089-2014

Landing, W. M., Perry, J. J., Guentzel, J. L., Gill, G. A., & Pollman, C. D. (1995). Relationships between the Atmospheric Deposition of Trace-Elements, Major Ions, and Mercury in Florida - the FAMS Project (1992-1993). *Water Air and Soil Pollution*, 80(1-4), 343-352. doi:10.1007/Bf01189684

Landing, W. M., Guentzel, J. L., Gill, G. A., & Pollman, C. D. (1998). Methods for Measuring Mercury in Rainfall and Aerosols in Florida. *Atmospheric Environment*, 32(5), 909-918. doi:10.1016/S1352-2310(97)00115-5

Lapina, K., Heald, C. L., Spracklen, D. V., Arnold, S. R., Allan, J. D., Coe, H., . . . Hind, A. J. (2011). Investigating Organic Aerosol Loading in the Remote Marine Environment. *Atmospheric Chemistry and Physics*, 11(17), 8847-8860.

Leaitch, W. R., Banic, C. M., Isaac, G. A., Couture, M. D., Liu, P. S. K., Gultepe, I., . . . MacPherson, J. I. (1996). Physical and Chemical Observations in Marine Stratus During the 1993 North Atlantic Regional Experiment: Factors Controlling Cloud Droplet Number Concentrations. *Journal of Geophysical Research-Atmospheres*, 101(D22), 29123-29135. doi:10.1029/96jd01228

Leaitch, W. R., Lohmann, U., Russell, L. M., Garrett, T., Shantz, N. C., Toom-Saunty, D., . . . Jayne, J. T. (2010). Cloud Albedo Increase from Carbonaceous Aerosol. *Atmospheric Chemistry and Physics*, 10(16), 7669-7684. doi:10.5194/acp-10-7669-2010

Lee, S. C., Harner, T., Pozo, K., Shoeib, M., Wania, F., Muir, D. C. G., . . . Jones, K. C. (2007). Polychlorinated Naphthalenes in the Global Atmospheric Passive Sampling (GAPS) Study. *Environmental Science & Technology*, 41(8), 2680-2687.

- Lee, S. H., Kim, S. W., Trainer, M., Frost, G. J., McKeen, S. A., Cooper, O. R., . . . Thompson, A. M. (2011). Modeling Ozone Plumes Observed Downwind of New York City over the North Atlantic Ocean During the ICARTT Field Campaign. *Atmospheric Chemistry and Physics*, 11(14), 7375-7397. doi:10.5194/acp-11-7375-2011
- Lee, H. J., Chatfield, R. B., & Bell, M. L. (2018). Spatial Analysis of Concentrations of Multiple Air Pollutants Using NASA DISCOVER-AQ Aircraft Measurements: Implications for Exposure Assessment. *Environmental Research*, 160, 487-498. doi:10.1016/j.envres.2017.10.017
- Leibensperger, E. M., Mickley, L. J., Jacob, D. J., Chen, W. T., Seinfeld, J. H., Nenes, A., . . . Rind, D. (2012a). Climatic Effects of 1950-2050 Changes in US Anthropogenic Aerosols - Part 1: Aerosol Trends and Radiative Forcing. *Atmospheric Chemistry and Physics*, 12(7), 3333-3348.
- Leibensperger, E. M., Mickley, L. J., Jacob, D. J., Chen, W. T., Seinfeld, J. H., Nenes, A., . . . Rind, D. (2012b). Climatic Effects of 1950-2050 Changes in US Anthropogenic Aerosols - Part 2: Climate Response. *Atmospheric Chemistry and Physics*, 12(7), 3349-3362.
- Levy, R. C., Remer, L. A., Martins, J. V., Kaufman, Y. J., Plana-Fattori, A., Redemann, J., & Wenny, B. (2005). Evaluation of the Modis Aerosol Retrievals over Ocean and Land During CLAMS. *Journal of the Atmospheric Sciences*, 62(4), 974-992.
- Lewis, A. C., Evans, M. J., Methven, J., Watson, N., Lee, J. D., Hopkins, J. R., . . . Crosier, J. (2007). Chemical Composition Observed over the Mid-Atlantic and the Detection of Pollution Signatures Far from Source Regions. *Journal of Geophysical Research-Atmospheres*, 112(D10). doi:10.1029/2006jd007584
- Lewis, J., De Young, R., & Chu, D. A. (2010). A Study of Air Quality in the Southeastern Hampton-Norfolk-Virginia Beach Region with Airborne Lidar Measurements and Modis Aerosol Optical Depth Retrievals. *Journal of Applied Meteorology and Climatology*, 49(1), 3-19.
- Li, Q. B., Jacob, D. J., Bey, I., Palmer, P. I., Duncan, B. N., Field, B. D., . . . Oltmans, S. J. (2002). Transatlantic Transport of Pollution and Its Effects on Surface Ozone in Europe and North America. *Journal of Geophysical Research-Atmospheres*, 107(D13).
- Li, X. F., Zheng, W. H., Pichel, W. G., Zou, C. Z., Clemente-Colon, P., & Zheng, W. (2004a). A Cloud Line over the Gulf Stream. *Geophysical Research Letters*, 31(14). doi:10.1029/2004gl019892
- Li, Q. B., Jacob, D. J., Munger, J. W., Yantosca, R. M., & Parrish, D. D. (2004b). Export of NO<sub>y</sub> from the North American Boundary Layer: Reconciling Aircraft Observations and Global Model Budgets. *Journal of Geophysical Research-Atmospheres*, 109(D2).
- Li, Q. B., Jacob, D. J., Park, R., Wang, Y. X., Heald, C. L., Hudman, R., . . . Evans, M. (2005). North American Pollution Outflow and the Trapping of Convectively Lifted Pollution by Upper-Level Anticyclone. *Journal of Geophysical Research-Atmospheres*, 110(D10).
- Li, Y., Barth, M. C., Patton, E. G., & Steiner, A. L. (2017). Impact of in-Cloud Aqueous Processes on the Chemistry and Transport of Biogenic Volatile Organic Compounds. *Journal of Geophysical Research-Atmospheres*, 122(20), 11131-11153. doi:10.1002/2017jd026688
- Likens, G. E., & Bormann, F. H. (1974). Acid Rain: A Serious Regional Environmental Problem. *Science*, 184(4142), 1176. doi:10.1126/science.184.4142.1176



- Likens, G. E., Bormann, F. H., & Johnson, N. M. (1972). Acid Rain. *Environment: Science and Policy for Sustainable Development*, 14(2), 33-40.  
doi:10.1080/00139157.1972.9933001
- Lim, B., Jickells, T. D., Colin, J. L., & Losno, R. (1994). Solubilities of Al, Pb, Cu, and Zn in Rain Sampled in the Marine-Environment over the North-Atlantic Ocean and Mediterranean-Sea. *Global Biogeochemical Cycles*, 8(3), 349-362.
- Lin, X., Trainer, M., & Hsie, E. Y. (1998). A Modeling Study of Tropospheric Species During the North Atlantic Regional Experiment (NARE). *Journal of Geophysical Research-Atmospheres*, 103(D11), 13593-13613.
- Lin, C. T., Baker, A. R., Jickells, T. D., Kelly, S., & Lesworth, T. (2012). An Assessment of the Significance of Sulphate Sources over the Atlantic Ocean Based on Sulphur Isotope Data. *Atmospheric Environment*, 62, 615-621.
- Lindner, B. L., & Frysinger, J. R. (2007). Bulk Atmospheric Deposition in the Charleston Harbor Watershed. *Journal of Coastal Research*, 23(6), 1452-1461. doi:10.2112/05-0596.1
- Liu, J., & Li, Z. (2019). Aerosol Properties and Their Influences on Low Warm Clouds During the Two-Column Aerosol Project. *Atmos. Chem. Phys.*, 19(14), 9515-9529.  
doi:10.5194/acp-19-9515-2019
- Liu, X. H., Hegg, D. A., & Stoelinga, M. T. (2001). Numerical Simulation of New Particle Formation over the Northwest Atlantic Using the MM5 Mesoscale Model Coupled with Sulfur Chemistry. *Journal of Geophysical Research-Atmospheres*, 106(D9), 9697-9715.
- Liu, Y. N., Yvon-Lewis, S. A., Hu, L., Salisbury, J. E., & O'Hern, J. E. (2011).  $\text{CH}_3\text{Br}$ ,  $\text{CH}_2\text{Br}_2$ , and  $\text{CHClBr}_2$  in U.S. Coastal Waters During the Gulf of Mexico and East Coast Carbon Cruise. *Journal of Geophysical Research-Oceans*, 116. doi:10.1029/2010jc006729
- Liu, J. W., Xie, S. P., Norris, J. R., & Zhang, S. P. (2014). Low-Level Cloud Response to the Gulf Stream Front in Winter Using Calipso. *Journal of Climate*, 27(12), 4421-4432.  
doi:10.1175/Jcli-D-13-00469.1
- Lomas, M. W., Lipschultz, F., Nelson, D. M., Krause, J. W., & Bates, N. R. (2009). Biogeochemical Responses to Late-Winter Storms in the Sargasso Sea, I—Pulses of Primary and New Production. *Deep Sea Research Part I: Oceanographic Research Papers*, 56(6), 843-860.  
doi:10.1016/j.dsr.2008.09.002
- Lomas, M. W., Bates, N. R., Johnson, R. J., Knap, A. H., Steinberg, D. K., & Carlson, C. A. (2013). Two Decades and Counting: 24-Years of Sustained Open Ocean Biogeochemical Measurements in the Sargasso Sea. *Deep Sea Research Part II: Topical Studies in Oceanography*, 93, 16-32. doi:10.1016/j.dsr2.2013.01.008
- Lombardo, K., Colle, B. A., & Zhang, Z. (2015). Evaluation of Historical and Future Cool Season Precipitation over the Eastern United States and Western Atlantic Storm Track Using CMIP5 Models. *Journal of Climate*, 28(2), 451-467. doi:10.1175/jcli-d-14-00343.1
- Long, Z., Perrie, W., Gyakum, J., Laprise, R., & Caya, D. (2009). Scenario Changes in the Climatology of Winter Midlatitude Cyclone Activity over Eastern North America and the Northwest Atlantic. *Journal of Geophysical Research-Atmospheres*, 114.
- Long, M. S., Keene, W. C., Kieber, D. J., Frossard, A. A., Russell, L. M., Maben, J. R., . . . Bates, T. S. (2014). Light-Enhanced Primary Marine Aerosol Production from Biologically

Productive Seawater. *Geophysical Research Letters*, 41(7), 2661-2670.

doi:10.1002/2014gl059436

Loughner, C. P., Tzortziou, M., Shroder, S., & Pickering, K. E. (2016). Enhanced Dry Deposition of Nitrogen Pollution near Coastlines: A Case Study Covering the Chesapeake Bay Estuary and Atlantic Ocean Coastline. *Journal of Geophysical Research: Atmospheres*, 121(23), 14,221-214,238. doi:10.1002/2016jd025571

Luan, Y., & Jaegle, L. (2013). Composite Study of Aerosol Export Events from East Asia and North America. *Atmospheric Chemistry and Physics*, 13(3), 1221-1242. doi:10.5194/acp-13-1221-2013

Lukashin, V. N., Isaeva, A. B., Serova, V. V., Gordeev, V. Y., & Stein, R. (2000). Research of the Aerosols over the North Atlantic Ocean. *Oceanology*, 40(4), 557-568.

Luke, W. T., & Dickerson, R. R. (1987). The Flux of Reactive Nitrogen Compounds from Eastern North America to the Western Atlantic Ocean. *Global Biogeochemical Cycles*, 1(4), 329-343.

Luria, M., & Sievering, H. (1991). Heterogeneous and Homogeneous Oxidation of SO<sub>2</sub> in the Remote Marine Atmosphere. *Atmospheric Environment Part a-General Topics*, 25(8), 1489-1496.

Luria, M., Van Valin, C. C., Gunter, R. L., Wellman, D. L., Keene, W. C., Galloway, J. N., . . . Boatman, J. F. (1990). Sulfur Dioxide over the Western North Atlantic Ocean During GCE/CASE/WATOX. *Global Biogeochemical Cycles*, 4(4), 381-393.

Macdonald, A. M., Banic, C. M., Leitch, W. R., & Puckett, K. J. (1993). Evaluation of the Eulerian Acid Deposition and Oxidant Model (ADOM) with Summer 1988 Aircraft Data. *Atmospheric Environment Part a-General Topics*, 27(6), 1019-1034. doi:10.1016/0960-1686(93)90014-P

Mackey, K. R. M., Buck, K. N., Casey, J. R., Cid, A., Lomas, M. W., Sohrin, Y., & Paytan, A. (2012a). Phytoplankton Responses to Atmospheric Metal Deposition in the Coastal and Open-Ocean Sargasso Sea. *Frontiers in Microbiology*, 3.

Mackey, K. R. M., Roberts, K., Lomas, M. W., Saito, M. A., Post, A. F., & Paytan, A. (2012b). Enhanced Solubility and Ecological Impact of Atmospheric Phosphorus Deposition Upon Extended Seawater Exposure. *Environmental Science & Technology*, 46(19), 10438-10446.

MacLeod, M., Kierkegaard, A., Genualdi, S., Harner, T., & Scheringer, M. (2013). Junge Relationships in Measurement Data for Cyclic Siloxanes in Air. *Chemosphere*, 93(5), 830-834.

Magi, B. I., Hobbs, P. V., Kirchstetter, T. W., Novakov, T., Hegg, D. A., Gao, S., . . . Schmid, B. (2005). Aerosol Properties and Chemical Apportionment of Aerosol Optical Depth at Locations Off the US East Coast in July and August 2001. *Journal of the Atmospheric Sciences*, 62(4), 919-933. doi:10.1175/Jas3263.1

Mahowald, N. M., Rasch, P. J., Eaton, B. E., Whittlestone, S., & Prinn, R. G. (1997). Transport of (222)Radon to the Remote Troposphere Using the Model of Atmospheric Transport and Chemistry and Assimilated Winds from Ecmwf and the National Center for Environmental Prediction Near. *Journal of Geophysical Research-Atmospheres*, 102(D23), 28139-28151.

Mao, H., & Talbot, R. (2012). Speciated Mercury at Marine, Coastal, and Inland Sites in New England – Part 1: Temporal Variability. *Atmos. Chem. Phys.*, 12(11), 5099-5112. doi:10.5194/acp-12-5099-2012

Mao, H. T., & Talbot, R. (2004a). O<sub>3</sub> and CO in New England: Temporal Variations and Relationships. *Journal of Geophysical Research-Atmospheres*, 109(D21).

Mao, H. T., & Talbot, R. (2004b). Role of Meteorological Processes in Two New England Ozone Episodes During Summer 2001. *Journal of Geophysical Research-Atmospheres*, 109(D20). doi:10.1029/2004jd004850

Mao, H. T., Talbot, R., Troop, D., Johnson, R., Businger, S., & Thompson, A. M. (2006). Smart Balloon Observations over the North Atlantic: O-3 Data Analysis and Modeling. *Journal of Geophysical Research-Atmospheres*, 111(D23).

Mao, H., Talbot, R., Hegarty, J., & Koerner, J. (2012). Speciated Mercury at Marine, Coastal, and Inland Sites in New England - Part 2: Relationships with Atmospheric Physical Parameters. *Atmospheric Chemistry and Physics*, 12(9), 4181-4206. doi:10.5194/acp-12-4181-2012

Marenco, A., Thouret, V., Nedelec, P., Smit, H., Helten, M., Kley, D., . . . Cook, T. (1998). Measurement of Ozone and Water Vapor by Airbus in-Service Aircraft: The Mozaic Airborne Program, an Overview. *Journal of Geophysical Research-Atmospheres*, 103(D19), 25631-25642.

Maring, H., & Schwartz, G. (1994). A Condensation Particle Counter for Long-Term Continuous Use in the Remote Marine-Environment. *Atmospheric Environment*, 28(20), 3293-3298.

Martin, J. E., Locatelli, J. D., & Hobbs, P. V. (1990). Organization and Structure of Clouds and Precipitation on the Mid-Atlantic Coast of The United States. Part Iii: The Evolution of a Middle-Tropospheric Cold Front. *Monthly Weather Review*, 118(2), 195-217. doi:10.1175/1520-0493(1990)118<0195:oasofc>2.0.co;2

Martin, R. V., Sioris, C. E., Chance, K., Ryerson, T. B., Bertram, T. H., Wooldridge, P. J., . . . Flocke, F. M. (2006). Evaluation of Space-Based Constraints on Global Nitrogen Oxide Emissions with Regional Aircraft Measurements over and Downwind of Eastern North America. *Journal of Geophysical Research-Atmospheres*, 111(D15).

Martins, J. V., Artaxo, P., Kaufman, Y. J., Castanho, A. D., & Remer, L. A. (2009). Spectral Absorption Properties of Aerosol Particles from 350-2500nm. *Geophysical Research Letters*, 36.

Martins, D. K., Stauffer, R. M., Thompson, A. M., Halliday, H. S., Kollonige, D., Joseph, E., & Weinheimer, A. J. (2015). Ozone Correlations between Mid-Tropospheric Partial Columns and the near-Surface at Two Mid-Atlantic Sites During the DISCOVER-AQ Campaign in July 2011. *Journal of Atmospheric Chemistry*, 72(3-4), 373-391. doi:10.1007/s10874-013-9259-4

Massling, A., Wiedensohler, A., Busch, B., Neususs, C., Quinn, P., Bates, T., & Covert, D. (2003). Hygroscopic Properties of Different Aerosol Types over the Atlantic and Indian Oceans. *Atmospheric Chemistry and Physics*, 3, 1377-1397.

Matrai, P. A., Balch, W. M., Cooper, D. J., & Saltzman, E. S. (1993). Ocean Color and Atmospheric Dimethyl Sulfide - on Their Mesoscale Variability. *Journal of Geophysical Research-Atmospheres*, 98(D12), 23469-23476.

- Mazzuca, G. M., Pickering, K. E., Clark, R. D., Loughner, C. P., Fried, A., Zweers, D. C. S., . . . Dickerson, R. R. (2017). Use of Tethersonde and Aircraft Profiles to Study the Impact of Mesoscale and Microscale Meteorology on Air Quality. *Atmospheric Environment*, 149, 55-69. doi:10.1016/j.atmosenv.2016.10.025
- McCaffery, S. J., McKeen, S. A., Hsie, E. Y., Parrish, D. D., Cooper, O. R., Holloway, J. S., . . . Trainer, M. (2004). A Case Study of Stratosphere-Troposphere Exchange During the 1996 North Atlantic Regional Experiment. *Journal of Geophysical Research-Atmospheres*, 109(D14).
- McInnes, M. A., Ellis, D. A., Webster, E. M., & Peters, A. (2013). Sea Spray and the Atmospheric Transport of Nonylphenol Ethoxylates. A Combined Laboratory, Field and Modeling Study. *Atmospheric Environment*, 69, 304-312.
- McKeen, S., Wilczak, J., Grell, G., Djalalova, I., Peckham, S., Hsie, E.-Y., . . . Mathur, R. (2005). Assessment of an Ensemble of Seven Real-Time Ozone Forecasts over Eastern North America During the Summer of 2004. *Journal of Geophysical Research: Atmospheres*, 110(D21). doi:10.1029/2005jd005858
- McKeen, S., Chung, S. H., Wilczak, J., Grell, G., Djalalova, I., Peckham, S., . . . Yu, S. (2007). Evaluation of Several Pm2.5 Forecast Models Using Data Collected During the Icartt/Neaqs 2004 Field Study. *Journal of Geophysical Research: Atmospheres*, 112(D10). doi:10.1029/2006jd007608
- McNaughton, D. J., & Vet, R. J. (1996). Eulerian Model Evaluation Field Study (Emefs): A Summary of Surface Network Measurements and Data Quality. *Atmospheric Environment*, 30(2), 227-238. [https://doi.org/10.1016/1352-2310\(95\)00273-2](https://doi.org/10.1016/1352-2310(95)00273-2)
- McPherson, C. J., Reagan, J. A., Schafer, J., Giles, D., Ferrare, R., Hair, J., & Hostetler, C. (2010). Aeronet, Airborne HSRL, and CALIPSO Aerosol Retrievals Compared and Combined: A Case Study. *Journal of Geophysical Research-Atmospheres*, 115.
- Mead, C., Herckes, P., Majestic, B. J., & Anbar, A. D. (2013). Source Apportionment of Aerosol Iron in the Marine Environment Using Iron Isotope Analysis. *Geophysical Research Letters*, 40(21), 5722-5727.
- Medina, J., Nenes, A., Sotiropoulou, R.-E. P., Cottrell, L. D., Ziemba, L. D., Beckman, P. J., & Griffin, R. J. (2007). Cloud Condensation Nuclei Closure During the International Consortium for Atmospheric Research on Transport and Transformation 2004 Campaign: Effects of Size-Resolved Composition. *Journal of Geophysical Research: Atmospheres*, 112(D10). doi:10.1029/2006jd007588
- Melfi, S. H., Spinhirne, J. D., Chou, S. H., & Palm, S. P. (1985). Lidar Observations of Vertically Organized Convection in the Planetary Boundary-Layer over the Ocean. *Journal of Climate and Applied Meteorology*, 24(8), 806-821.
- Merrill, J. T. (1994). Isentropic Air-Flow Probability Analysis. *Journal of Geophysical Research-Atmospheres*, 99(D12), 25881-25889.
- Merrill, J. T., & Moody, J. L. (1996). Synoptic Meteorology and Transport During the North Atlantic Regional Experiment (NARE) Intensive: Overview. *Journal of Geophysical Research-Atmospheres*, 101(D22), 28903-28921.

- Merrill, J. T., Moody, J. L., Oltmans, S. J., & Levy, H. (1996). Meteorological Analysis of Tropospheric Ozone Profiles at Bermuda. *Journal of Geophysical Research-Atmospheres*, 101(D22), 29201-29211.
- Meskhidze, N., Jaimes-Correa, J. C., Petters, M. D., Royalty, T. M., Phillips, B. N., Zimmerman, A., & Reed, R. (2019). Possible Wintertime Sources of Fine Particles in an Urban Environment. *Journal of Geophysical Research: Atmospheres*, doi:10.1029/2019jd031367
- Mesias, J. M., Bisagni, J. J., & Brunner, A. M. E. G. (2007). A High-Resolution Satellite-Derived Sea Surface Temperature Climatology for the Western North Atlantic Ocean. *Continental Shelf Research*, 27(2), 191-207.
- Meskhidze, N., Jaimes-Correa, J. C., Petters, M. D., Royalty, T. M., Phillips, B. N., Zimmerman, A., & Reed, R. (2019). Possible Wintertime Sources of Fine Particles in an Urban Environment. *Journal of Geophysical Research: Atmospheres*, n/a(n/a). doi:10.1029/2019jd031367
- Methven, J., Arnold, S. R., Stohl, A., Evans, M. J., Avery, M., Law, K., . . . Williams, P. I. (2006). Establishing Lagrangian Connections between Observations within Air Masses Crossing the Atlantic During the International Consortium for Atmospheric Research on Transport and Transformation Experiment. *Journal of Geophysical Research: Atmospheres*, 111(D23). doi:10.1029/2006jd007540
- Michaels, A. F., & Knap, A. H. (1996). Overview of the Us Jgofs Bermuda Atlantic Time-Series Study and the Hydrostation S Program. *Deep-Sea Research Part Ii-Topical Studies in Oceanography*, 43(2-3), 157-198.
- Michaels, A. F., Siegel, D. A., Johnson, R. J., Knap, A. H., & Galloway, J. N. (1993). Episodic Inputs of Atmospheric Nitrogen to the Sargasso Sea - Contributions to New Production and Phytoplankton Blooms. *Global Biogeochemical Cycles*, 7(2), 339-351.
- Miller, J. E. (1946). Cyclogenesis in the Atlantic Coastal Region of the United States. *Journal of Meteorology*, 3(2), 31-44. doi:10.1175/1520-0469(1946)003<0031:citacr>2.0.co;2
- Miller, J. M., & Harris, J. M. (1985). The Flow Climatology to Bermuda and Its Implications for Long-Range Transport. *Atmospheric Environment*, 19(3), 409-414.
- Miller, C., Gibbons, M., Beatty, K., & Boissonnade, A. (2013). Topographic Speed-up Effects and Observed Roof Damage on Bermuda Following Hurricane Fabian (2003). *Weather and Forecasting*, 28(1), 159-174. doi:10.1175/waf-d-12-00050.1
- Millet, D. B., Goldstein, A. H., Holzinger, R., Williams, B. J., Allan, J. D., Jimenez, J. L., . . . Stohl, A. (2006). Chemical Characteristics of North American Surface Layer Outflow: Insights from Chebogue Point, Nova Scotia. *Journal of Geophysical Research-Atmospheres*, 111(D23).
- Milne, P. J., Prados, A. I., Dickerson, R. R., Doddridge, B. G., Riemer, D. D., Zika, R. G., . . . Moody, J. L. (2000). Nonmethane Hydrocarbon Mixing Ratios in Continental Outflow Air from Eastern North America: Export of Ozone Precursors to Bermuda. *Journal of Geophysical Research-Atmospheres*, 105(D8), 9981-9990.
- Molthan, A. L., Colle, B. A., Yuter, S. E., & Stark, D. (2016). Comparisons of Modeled and Observed Reflectivities and Fall Speeds for Snowfall of Varied Riming Degrees During Winter Storms on Long Island, New York. *Monthly Weather Review*, 144(11), 4327-4347. doi:10.1175/mwr-d-15-0397.1

- Moody, J. L., & Galloway, J. N. (1988). Quantifying the Relationship between Atmospheric Transport and the Chemical Composition of Precipitation on Bermuda. *Tellus B: Chemical and Physical Meteorology*, 40(5), 463-479. doi:10.3402/tellusb.v40i5.16014
- Moody, J. L., Oltmans, S. J., Levy II, H., & Merrill, J. T. (1995). A Transport Climatology of Tropospheric Ozone, Bermuda: 1988–1991. *J. Geophys. Res.*, 100, 7179-7194.
- Moody, J. L., Davenport, J. C., Merrill, J. T., Oltmans, S. J., Parrish, D. D., Holloway, J. S., . . . Buhr, M. (1996). Meteorological Mechanisms for Transporting O-3 over the Western North Atlantic Ocean: A Case Study for August 24-29, 1993. *Journal of Geophysical Research-Atmospheres*, 101(D22), 29213-29227.
- Moody, J. L., Keene, W. C., Cooper, O. R., Voss, K. J., Aryal, R., Eckhardt, S., . . . Galloway, J. N. (2014). Flow Climatology for Physicochemical Properties of Dichotomous Aerosol over the Western North Atlantic Ocean at Bermuda. *Atmospheric Chemistry and Physics*, 14(2), 691-717.
- Moore, R. H., Karydis, V. A., Capps, S. L., Lathem, T. L., & Nenes, A. (2013). Droplet Number Uncertainties Associated with CCN: An Assessment Using Observations and a Global Model Adjoint. *Atmos. Chem. Phys.*, 13(8), 4235-4251. doi:10.5194/acp-13-4235-2013
- Muhs, D. R., Budahn, J. R., Prospero, J. M., & Carey, S. N. (2007). Geochemical Evidence for African Dust Inputs to Soils of Western Atlantic Islands: Barbados, the Bahamas, and Florida. *Journal of Geophysical Research-Earth Surface*, 112(F2). doi:10.1029/2005jf000445
- Muhs, D. R., Budahn, J. R., Prospero, J. M., Skipp, G., & Herwitz, S. R. (2012). Soil Genesis on the Island of Bermuda in the Quaternary: The Importance of African Dust Transport and Deposition. *Journal of Geophysical Research-Earth Surface*, 117.
- Mullaugh, K. M., Byrd, J. N., Avery, G. B., Mead, R. N., Willey, J. D., & Kieber, R. J. (2014). Characterization of Carbohydrates in Rainwater from the Southeastern North Carolina. *Chemosphere*, 107, 51-57. doi:10.1016/j.chemosphere.2014.03.014
- Muller, D., Hostetler, C. A., Ferrare, R. A., Burton, S. P., Chemyakin, E., Kolgotin, A., . . . Schmid, B. (2014). Airborne Multiwavelength High Spectral Resolution Lidar (Hsrl-2) Observations During Tcap 2012: Vertical Profiles of Optical and Microphysical Properties of a Smoke/Urban Haze Plume over the Northeastern Coast of the Us. *Atmospheric Measurement Techniques*, 7(10), 3487-3496. doi:10.5194/amt-7-3487-2014
- Munchak, L. A., Levy, R. C., Mattoo, S., Remer, L. A., Holben, B. N., Schafer, J. S., . . . Ferrare, R. A. (2013). MODIS 3 Km Aerosol Product: Applications over Land in an Urban/Suburban Region. *Atmospheric Measurement Techniques*, 6(7), 1747-1759. doi:10.5194/amt-6-1747-2013
- Murphy, D. M., Cziczo, D. J., Froyd, K. D., Hudson, P. K., Matthew, B. M., Middlebrook, A. M., . . . Weber, R. J. (2006). Single-Particle Mass Spectrometry of Tropospheric Aerosol Particles. *Journal of Geophysical Research-Atmospheres*, 111(D23). doi:10.1029/2006jd007340
- Neiman, P. J., & Shapiro, M. A. (1993). The Life Cycle of an Extratropical Marine Cyclone. Part I: Frontal-Cyclone Evolution and Thermodynamic Air-Sea Interaction. *Monthly Weather Review*, 121(8), 2153-2176. doi:10.1175/1520-0493(1993)121<2153:tlcoae>2.0.co;2

- Neiman, P. J., Shapiro, M. A., & Fedor, L. S. (1993). The Life Cycle of an Extratropical Marine Cyclone. Part II: Mesoscale Structure and Diagnostics. *Monthly Weather Review*, 121(8), 2177-2199. doi:10.1175/1520-0493(1993)121<2177:tlcoae>2.0.co;2
- Nelson, N. B. (1998). Spatial and Temporal Extent of Sea Surface Temperature Modifications by Hurricanes in the Sargasso Sea During the 1995 Season. *Monthly Weather Review*, 126(5), 1364-1368. doi:10.1175/1520-0493(1998)126<1364:sateos>2.0.co;2
- Neuman, J. A., Parrish, D. D., Trainer, M., Ryerson, T. B., Holloway, J. S., Nowak, J. B., . . . Fehsenfeld, F. C. (2006). Reactive Nitrogen Transport and Photochemistry in Urban Plumes over the North Atlantic Ocean. *Journal of Geophysical Research-Atmospheres*, 111(D23).
- Nicosia, D. J., & Grumm, R. H. (1999). Mesoscale Band Formation in Three Major Northeastern United States Snowstorms. *Weather and Forecasting*, 14(3), 346-368. doi:10.1175/1520-0434(1999)014<0346:mbfitm>2.0.co;2
- Niple, E. R., Scott, H. E., Conant, J. A., Jones, S. H., Iannarilli, F. J., & Pereira, W. E. (2016). Application of Oxygen a-Band Equivalent Width to Disambiguate Downwelling Radiances for Cloud Optical Depth Measurement. *Atmos. Meas. Tech.*, 9(9), 4167-4179. doi:10.5194/amt-9-4167-2016
- Novak, D. R., & Colle, B. A. (2012). Diagnosing Snowband Predictability Using a Multimodel Ensemble System. *Weather and Forecasting*, 27(3), 565-585. doi:10.1175/waf-d-11-00047.1
- Novak, D. R., Bosart, L. F., Keyser, D., & Waldstreicher, J. S. (2004). An Observational Study of Cold Season–Banded Precipitation in Northeast U.S. Cyclones. *Weather and Forecasting*, 19(6), 993-1010. doi:10.1175/815.1
- Novak, D. R., Waldstreicher, J. S., Keyser, D., & Bosart, L. F. (2006). A Forecast Strategy for Anticipating Cold Season Mesoscale Band Formation within Eastern U.S. Cyclones. *Weather and Forecasting*, 21(1), 3-23. doi:10.1175/waf907.1
- Novak, D. R., Colle, B. A., & Yuter, S. E. (2008). High-Resolution Observations and Model Simulations of the Life Cycle of an Intense Mesoscale Snowband over the Northeastern United States. *Monthly Weather Review*, 136(4), 1433-1456. doi:10.1175/2007mwr2233.1
- Novak, D. R., Colle, B. A., & Aiyyer, A. R. (2010). Evolution of Mesoscale Precipitation Band Environments within the Comma Head of Northeast U.S. Cyclones. *Monthly Weather Review*, 138(6), 2354-2374. doi:10.1175/2010mwr3219.1
- Novakov, T., Hegg, D. A., & Hobbs, P. V. (1997). Airborne Measurements of Carbonaceous Aerosols on the East Coast of the United States. *Journal of Geophysical Research-Atmospheres*, 102(D25), 30023-30030.
- Nowak, J. B., Neuman, J. A., Kozai, K., Huey, L. G., Tanner, D. J., Holloway, J. S., . . . Fehsenfeld, F. C. (2007). A Chemical Ionization Mass Spectrometry Technique for Airborne Measurements of Ammonia. *Journal of Geophysical Research: Atmospheres*, 112(D10). doi:10.1029/2006jd007589
- Oltmans, S. J., & Levy, H. (1992). Seasonal Cycle of Surface Ozone over the Western North-Atlantic. *Nature*, 358(6385), 392-394.
- Oltmans, S. J., & Levy, H. (1994). Surface Ozone Measurements from a Global Network (Vol 28, Pg 9, 1994). *Atmospheric Environment*, 28(10), 1807-1807.

- Oltmans, S. J., Lefohn, A. S., Harris, J. M., Galbally, I., Scheel, H. E., Bodeker, G., . . . Cuevas, E. (2006). Long-Term Changes in Tropospheric Ozone. *Atmospheric Environment*, 40(17), 3156-3173.
- Oltmans, S. J., Lefohn, A. S., Shadwick, D., Harris, J. M., Scheel, H. E., Galbally, I., . . . Kawasato, T. (2013). Recent Tropospheric Ozone Changes - a Pattern Dominated by Slow or No Growth. *Atmospheric Environment*, 67, 331-351.
- Orcutt, K. M., Lipschultz, F., Gundersen, K., Arimoto, R., Michaels, A. F., Knap, A. H., & Gallon, J. R. (2001). A Seasonal Study of the Significance of N-2 Fixation by *Trichodesmium* Spp. At the Bermuda Atlantic Time-Series Study (BATS) Site. *Deep-Sea Research Part II-Topical Studies in Oceanography*, 48(8-9), 1583-1608.
- Orton, P. M., Hall, T. M., Talke, S. A., Blumberg, A. F., Georgas, N., & Vinogradov, S. (2016). A Validated Tropical-Extratropical Flood Hazard Assessment for New York Harbor. *Journal of Geophysical Research: Oceans*, 121(12), 8904-8929. doi:10.1002/2016jc011679
- Osthoff, H. D., Brown, S. S., Ryerson, T. B., Fortin, T. J., Lerner, B. M., Williams, E. J., . . . Ravishankara, A. R. (2006a). Measurement of Atmospheric NO<sub>2</sub> by Pulsed Cavity Ring-Down Spectroscopy. *Journal of Geophysical Research: Atmospheres*, 111(D12). doi:10.1029/2005jd006942
- Osthoff, H. D., Sommariva, R., Baynard, T., Pettersson, A., Williams, E. J., Lerner, B. M., . . . Brown, S. S. (2006b). Observation of Daytime N<sub>2</sub>O<sub>5</sub> in the Marine Boundary Layer During New England Air Quality Study-Intercontinental Transport and Chemical Transformation 2004. *Journal of Geophysical Research: Atmospheres*, 111(D23). doi:10.1029/2006jd007593
- Ottaviani, M., Foster, R., Gilerson, A., Ibrahim, A., Carrizo, C., El-Habashi, A., . . . Cetinic, I. (2018). Airborne and Shipborne Polarimetric Measurements over Open Ocean and Coastal Waters: Intercomparisons and Implications for Spaceborne Observations. *Remote Sensing of Environment*, 206, 375-390. doi:10.1016/j.rse.2017.12.015
- Pagowski, M., & Grell, G. A. (2006). Ensemble-Based Ozone Forecasts: Skill and Economic Value. *Journal of Geophysical Research: Atmospheres*, 111(D23). doi:10.1029/2006jd007124
- Pagowski, M., Grell, G. A., McKeen, S. A., Dévényi, D., Wilczak, J. M., Bouchet, V., . . . Tang, Y. (2005). A Simple Method to Improve Ensemble-Based Ozone Forecasts. *Geophysical Research Letters*, 32(7). doi:10.1029/2004gl022305
- Pai, P., Karamchandani, P., & Seigneur, C. (1997). Simulation of the Regional Atmospheric Transport and Fate of Mercury Using a Comprehensive Eulerian Model. *Atmospheric Environment*, 31(17), 2717-2732. doi:10.1016/S1352-2310(97)00102-7
- Painemal, D., Clayton, M., Ferrare, R., Burton, S., Josset, D., & Vaughan, M. (2019). Novel Aerosol Extinction Coefficients and Lidar Ratios over the Ocean from Calipso-Cloudsat: Evaluation and Global Statistics. *Atmospheric Measurement Techniques*, 12(4), 2201-2217.
- Paladino, J. D., Hagen, D. E., Whitefield, P. D., Hopkins, A. R., Schmid, O., Wilson, M. R., . . . Schulte, P. (2000). Observations of Particulates within the North Atlantic Flight Corridor: Polinat 2, September-October 1997. *Journal of Geophysical Research-Atmospheres*, 105(D3), 3719-3726.



- Panshin, S. Y., & Hites, R. A. (1994). Atmospheric Concentrations of Polychlorinated-Biphenyls at Bermuda. *Environmental Science & Technology*, 28(12), 2001-2007.
- Park, S., & Leovy, C. B. (2004). Marine Low-Cloud Anomalies Associated with Enso. *Journal of Climate*, 17(17), 3448-3469.
- Parrish, D. D., Trainer, M., Holloway, J. S., Yee, J. E., Warshawsky, M. S., Fehsenfeld, F. C., . . . Moody, J. L. (1998). Relationships between Ozone and Carbon Monoxide at Surface Sites in the North Atlantic Region. *Journal of Geophysical Research-Atmospheres*, 103(D11), 13357-13376.
- Parrish, D. D., Holloway, J. S., Jakoubek, R., Trainer, M., Ryerson, T. B., Hubler, G., . . . Cooper, O. R. (2000). Mixing of Anthropogenic Pollution with Stratospheric Ozone: A Case Study from the North Atlantic Wintertime Troposphere. *Journal of Geophysical Research-Atmospheres*, 105(D19), 24363-24374.
- Parrish, D. D., Stohl, A., Forster, C., Atlas, E. L., Blake, D. R., Goldan, P. D., . . . de Gouw, J. A. (2007). Effects of Mixing on Evolution of Hydrocarbon Ratios in the Troposphere. *Journal of Geophysical Research: Atmospheres*, 112(D10). doi:10.1029/2006jd007583
- Parrish, D. D., Galbally, I. E., Lamarque, J. F., Naik, V., Horowitz, L., Shindell, D. T., . . . Cupeiro, M. (2016). Seasonal Cycles of O<sub>3</sub> in the Marine Boundary Layer: Observation and Model Simulation Comparisons. *Journal of Geophysical Research-Atmospheres*, 121(1), 538-557.
- Pechtl, S., & von Glasow, R. (2007). Reactive Chlorine in the Marine Boundary Layer in the Outflow of Polluted Continental Air: A Model Study. *Geophysical Research Letters*, 34(11). doi:10.1029/2007gl029761
- Peltier, R. E., Sullivan, A. P., Weber, R. J., Brock, C. A., Wollny, A. G., Holloway, J. S., . . . Warneke, C. (2007). Fine Aerosol Bulk Composition Measured on WP-3D Research Aircraft in Vicinity of the Northeastern United States - Results from Neaqs. *Atmospheric Chemistry and Physics*, 7(12), 3231-3247.
- Perhac, R. M. (1978). Sulfate Regional Experiment in Northeastern United States: The 'Sure' Program. *Atmospheric Environment* (1967), 12(1), 641-647. doi:[https://doi.org/10.1016/0004-6981\(78\)90244-5](https://doi.org/10.1016/0004-6981(78)90244-5)
- Petetin, H., Sauvage, B., Smit, H. G. J., Gheusi, F., Lohou, F., Blot, R., . . . Thouret, V. (2018). A Climatological View of the Vertical Stratification of Rh, O<sub>3</sub> and Co within the Pbl and at the Interface with Free Troposphere as Seen by Iagos Aircraft and Ozonesondes at Northern Mid-Latitudes over 1994–2016. *Atmos. Chem. Phys.*, 18(13), 9561-9581. doi:10.5194/acp-18-9561-2018
- Petron, G., Granier, C., Khattatov, B., Lamarque, J. F., Yudin, V., Muller, J. F., & Gille, J. (2002). Inverse Modeling of Carbon Monoxide Surface Emissions Using Climate Monitoring and Diagnostics Laboratory Network Observations. *Journal of Geophysical Research-Atmospheres*, 107(D24).
- Petzold, A., Thouret, V., Gerbig, C., Zahn, A., Brenninkmeijer, C. A. M., Gallagher, M., . . . Team, I. (2015). Global-Scale Atmosphere Monitoring by in-Service Aircraft - Current Achievements and Future Prospects of the European Research Infrastructure IAGOS. *Tellus Series B-Chemical and Physical Meteorology*, 67.

- Petzold, A., Kramer, M., Neis, P., Rolf, C., Rohs, S., Berkes, F., . . . Wahner, A. (2017). Upper Tropospheric Water Vapour and Its Interaction with Cirrus Clouds as Seen from IAGOS Long-Term Routine in Situ Observations. *Faraday Discussions*, 200, 229-249. doi:10.1039/c7fd00006e
- Peyridieu, S., Chedin, A., Tanre, D., Capelle, V., Pierangelo, C., Lamquin, N., & Armante, R. (2010). Saharan Dust Infrared Optical Depth and Altitude Retrieved from Airc: A Focus over North Atlantic - Comparison to MODIS and CALIPSO. *Atmospheric Chemistry and Physics*, 10(4), 1953-1967.
- Phillips, B. N., Royalty, T. M., Dawson, K. W., Reed, R., Petters, M. D., & Meskhidze, N. (2018). Hygroscopicity- and Size-Resolved Measurements of Submicron Aerosol on the East Coast of the United States. *Journal of Geophysical Research-Atmospheres*, 123(3), 1826-1839.
- Picca, J. C., Schultz, D. M., Colle, B. A., Ganetis, S., Novak, D. R., & Sienkiewicz, M. J. (2014). The Value of Dual-Polarization Radar in Diagnosing the Complex Microphysical Evolution of an Intense Snowband. *Bulletin of the American Meteorological Society*, 95(12), 1825-1834. doi:10.1175/bams-d-13-00258.1
- Pikelnaya, O., Hurlock, S. C., Trick, S., & Stutz, J. (2007). Intercomparison of Multiaxis and Long-Path Differential Optical Absorption Spectroscopy Measurements in the Marine Boundary Layer. *Journal of Geophysical Research-Atmospheres*, 112(D10). doi:10.1029/2006jd007727
- Piotrowicz, S. R., Fische, C. J., & Artz, R. S. (1990). Ozone and Carbon Monoxide over the North Atlantic During a Boreal Summer. *Global Biogeochemical Cycles*, 4(2), 215-224.
- Place, P. F., Ziemba, L. D., & Griffin, R. J. (2010). Observations of Nucleation-Mode Particle Events and Size Distributions at a Rural New England Site. *Atmospheric Environment*, 44(1), 88-94. doi:10.1016/j.atmosenv.2009.09.030
- Plant, G., Kort, E. A., Floerchinger, C., Gvakharia, A., Vimont, I., & Sweeney, C. (2019). Large Fugitive Methane Emissions from Urban Centers Along the US East Coast. *Geophysical Research Letters*, 46(14), 8500-8507. doi:10.1029/2019gl082635
- Pollman, C., Gill, G., Landing, W., Guentzel, J., Bare, D., Porcella, D., . . . Atkeson, T. (1995). Overview of the Florida Atmospheric Mercury Study (FAMs). *Water Air and Soil Pollution*, 80(1-4), 285-290. doi:10.1007/Bf01189678
- Powell, K. A., Hostetler, C. A., Liu, Z. Y., Vaughan, M. A., Kuehn, R. E., Hunt, W. H., . . . Winker, D. M. (2009). Calipso Lidar Calibration Algorithms. Part I: Nighttime 532-Nm Parallel Channel and 532-Nm Perpendicular Channel. *Journal of Atmospheric and Oceanic Technology*, 26(10), 2015-2033. doi:10.1175/2009jtecha1242.1
- Pozo, K., Harner, T., Lee, S. C., Wania, F., Muir, D. C. G., & Jones, K. C. (2009). Seasonally Resolved Concentrations of Persistent Organic Pollutants in the Global Atmosphere from the First Year of the Gaps Study. *Environmental Science & Technology*, 43(3), 796-803.
- Pozo, K., Harner, T., Wania, F., Muir, D. C. G., Jones, K. C., & Barrie, L. A. (2006). Toward a Global Network for Persistent Organic Pollutants in Air: Results from the GAPS Study. *Environmental Science & Technology*, 40(16), 4867-4873.
- Prados, A. I., Dickerson, R. R., Doddridge, B. G., Milne, P. A., Moody, J. L., & Merrill, J. T. (1999). Transport of Ozone and Pollutants from North America to the North Atlantic Ocean

During the 1996 Atmosphere/Ocean Chemistry Experiment (AEROCE) Intensive. *Journal of Geophysical Research-Atmospheres*, 104(D21), 26219-26233.

Pringle, K. J., Tost, H., Pozzer, A., Pöschl, U., & Lelieveld, J. (2010). Global Distribution of the Effective Aerosol Hygroscopicity Parameter for CCN Activation. *Atmos. Chem. Phys.*, 10(12), 5241-5255. doi:10.5194/acp-10-5241-2010

Prospero, J. M. (1999). Long-Term Measurements of the Transport of African Mineral Dust to the Southeastern United States: Implications for Regional Air Quality. *Journal of Geophysical Research-Atmospheres*, 104(D13), 15917-15927. doi:10.1029/1999jd900072

Prospero, J. M., & Carlson, T. N. (1971). Mineralogy of Aerosols Collected at Miami-Florida - Evidence for Frequent Presence of African Dust. *Transactions-American Geophysical Union*, 52(4), 370-&.

Prospero, J. M., & Landing, W. (2009). African Dust Deposition to Florida: How Well Do Dust Models Perform? WMO/GEO Expert Meeting on an International Sand and Dust Storm Warning System, 7. doi:10.1088/1755-1307/7/1/012015

Prospero, J. M., Nees, R. T., & Uematsu, M. (1987). Deposition Rate of Particulate and Dissolved Aluminum Derived from Saharan Dust in Precipitation at Miami, Florida. *Journal of Geophysical Research-Atmospheres*, 92(D12), 14723-14731. doi:10.1029/JD092iD12p14723

Prospero, J. M., Olmez, I., & Ames, M. (2001). Al and Fe in Pm 2.5 and Pm 10 Suspended Particles in South-Central Florida: The Impact of the Long Range Transport of African Mineral Dust. *Water Air and Soil Pollution*, 125(1-4), 291-317. doi:10.1023/A:1005277214288

Prospero, J. M., Landing, W. M., & Schulz, M. (2010). African Dust Deposition to Florida: Temporal and Spatial Variability and Comparisons to Models. *Journal of Geophysical Research-Atmospheres*, 115. doi:10.1029/2009jd012773

Pszenny, A. A. P., Galloway, J. N., Artz, R. S., & Boatman, J. F. (1990a). Overview of the 1988 GCE/CASE/WATOX Studies of Biogeochemical Cycles in the North Atlantic Region. *Global Biogeochemical Cycles*, 4(2), 121-131.

Pszenny, A. A. P., Harvey, G. R., Brown, C. J., Lang, R. F., Keene, W. C., Galloway, J. N., & Merrill, J. T. (1990b). Measurements of Dimethyl Sulfide Oxidation Products in the Summertime North Atlantic Marine Boundary Layer. *Global Biogeochemical Cycles*, 4(4), 367-379.

Pszenny, A. A. P., Keene, W. C., Jacob, D. J., Fan, S., Maben, J. R., Zetwo, M. P., . . . Galloway, J. N. (1993). Evidence of Inorganic Chlorine Gases Other Than Hydrogen Chloride in Marine Surface Air. *Geophysical Research Letters*, 20(8), 699-702. doi:10.1029/93gl00047

Pszenny, A. A. P., Fischer, E. V., Russo, R. S., Sive, B. C., & Varner, R. K. (2007). Estimates of Cl Atom Concentrations and Hydrocarbon Kinetic Reactivity in Surface Air at Appledore Island, Maine (USA), During International Consortium for Atmospheric Research on Transport and Transformation/Chemistry of Halogens at the Isles of Shoals. *Journal of Geophysical Research: Atmospheres*, 112(D10). doi:10.1029/2006jd007725

Pueschel, R. F., Boatman, J. F., & Artz, R. S. (1988). Aerosols over the Western Atlantic - Scale Heights, Concentrations and Fluxes. *Atmospheric Environment*, 22(11), 2371-2380.

- Quinn, P. K., & Bates, T. S. (2005). Regional Aerosol Properties: Comparisons of Boundary Layer Measurements from Ace 1, Ace 2, Aerosols99, Indoex, Ace Asia, Tarfox, and Neaqs. *Journal of Geophysical Research-Atmospheres*, 110(D14). doi:10.1029/2004jd004755
- Quinn, P. K., Coffman, D. J., Bates, T. S., Miller, T. L., Johnson, J. E., Voss, K., . . . Neuss, C. (2001). Dominant Aerosol Chemical Components and Their Contribution to Extinction During the Aerosols99 Cruise across the Atlantic. *Journal of Geophysical Research-Atmospheres*, 106(D18), 20783-20809.
- Quinn, P. K., Bates, T. S., Coffman, D., Onasch, T. B., Worsnop, D., Baynard, T., . . . Lovejoy, E. R. (2006). Impacts of Sources and Aging on Submicrometer Aerosol Properties in the Marine Boundary Layer across the Gulf of Maine. *Journal of Geophysical Research-Atmospheres*, 111(D23).
- Quinn, P. K., Bates, T. S., Schulz, K. S., Coffman, D. J., Frossard, A. A., Russell, L. M., . . . Kieber, D. J. (2014). Contribution of Sea Surface Carbon Pool to Organic Matter Enrichment in Sea Spray Aerosol. *Nature Geoscience*, 7, 228. doi:10.1038/ngeo2092  
<https://www.nature.com/articles/ngeo2092#supplementary-information>
- Quinn, P. K., Coffman, D. J., Johnson, J. E., Upchurch, L. M., & Bates, T. S. (2017). Small Fraction of Marine Cloud Condensation Nuclei Made up of Sea Spray Aerosol. *Nature Geoscience*, 10(9), 674-+.
- Raasch, S. (1990). Numerical-Simulation of the Development of the Convective Boundary-Layer During a Cold Air Outbreak. *Boundary-Layer Meteorology*, 52(4), 349-375.
- Raman, S., & Riordan, A. J. (1988). The Genesis of Atlantic Lows Experiment - the Planetary-Boundary-Layer Subprogram of Gale. *Bulletin of the American Meteorological Society*, 69(2), 161-172.
- Ray, J. D., Luria, M., Hastie, D. R., Malle, S., Keene, W. C., & Sievering, H. (1990a). Losses and Transport of Odd Nitrogen Species (NO<sub>y</sub>) over the Western Atlantic Ocean During GCE/CASE/WATOX. *Global Biogeochemical Cycles*, 4(3), 279-295.
- Ray, J. D., Van Valin, C. C., Luria, M., & Boatman, J. F. (1990b). Oxidants in the Marine Troposphere: H<sub>2</sub>O<sub>2</sub> and O<sub>3</sub> over the Western Atlantic Ocean. *Global Biogeochemical Cycles*, 4(2), 201-214.
- Ray, J. D., Heavner, R. L., Flores, M., & Michaelson, C. W. (1996). Surface Level Measurements of Ozone and Precursors at Coastal and Offshore Locations in the Gulf of Maine. *Journal of Geophysical Research-Atmospheres*, 101(D22), 29005-29011.
- Raymond, P. A. (2005). The Composition and Transport of Organic Carbon in Rainfall: Insights from the Natural (C-13 and C-14) Isotopes of Carbon. *Geophysical Research Letters*, 32(14). doi:10.1029/2005gl022879
- Real, E., Law, K. S., Weinzierl, B., Fiebig, M., Petzold, A., Wild, O., . . . Blake, D. (2007). Processes Influencing Ozone Levels in Alaskan Forest Fire Plumes During Long-Range Transport over the North Atlantic. *Journal of Geophysical Research-Atmospheres*, 112(D10). doi:10.1029/2006jd007576
- Reddy, P. J., Kreiner, F. W., DeLuisi, J. J., & Kim, Y. (1990). Aerosol Optical Depths over the Atlantic Derived from Shipboard Sunphotometer Observations During the 1988 Global Change Expedition. *Global Biogeochemical Cycles*, 4(3), 225-240.

Redemann, J., Turco, R. P., Liou, K. N., Russell, P. B., Bergstrom, R. W., Schmid, B., . . . Browell, E. V. (2000). Retrieving the Vertical Structure of the Effective Aerosol Complex Index of Refraction from a Combination of Aerosol in Situ and Remote Sensing Measurements During TARFOX. *Journal of Geophysical Research-Atmospheres*, 105(D8), 9949-9970. doi:10.1029/1999jd901044

Redemann, J., Schmid, B., Eilers, J. A., Kahn, R., Levy, R. C., Russell, P. B., . . . Holben, B. N. (2005). Suborbital Measurements of Spectral Aerosol Optical Depth and Its Variability at Subsatellite Grid Scales in Support of Clams 2001. *Journal of the Atmospheric Sciences*, 62(4), 993-1007.

Reed, R. J., Stoelinga, M. T., & Kuo, Y.-H. (1992). A Model-Aided Study of the Origin and Evolution of the Anomalous High Potential Vorticity in the Inner Region of a Rapidly Deepening Marine Cyclone. *Monthly Weather Review*, 120(6), 893-913. doi:10.1175/1520-0493(1992)120<0893:amasot>2.0.co;2

Reed, A. J., Thompson, A. M., Kollonige, D. E., Martins, D. K., Tzortziou, M. A., Herman, J. R., . . . Cede, A. (2015). Effects of Local Meteorology and Aerosols on Ozone and Nitrogen Dioxide Retrievals from Omi and Pandora Spectrometers in Maryland, USA During Discover-Aq 2011. *Journal of Atmospheric Chemistry*, 72(3-4), 455-482. doi:10.1007/s10874-013-9254-9

Reeves, C. E., Slemr, J., Oram, D. E., Worton, D., Penkett, S. A., Stewart, D. J., . . . Atlas, E. (2007). Alkyl Nitrates in Outflow from North America over the North Atlantic During Intercontinental Transport of Ozone and Precursors 2004. *Journal of Geophysical Research-Atmospheres*, 112(D10).

Reid, J. S., Jonsson, H. H., Smith, M. H., & Smirnov, A. (2001). Evolution of the Vertical Profile and Flux of Large Sea-Salt Particles in a Coastal Zone. *Journal of Geophysical Research-Atmospheres*, 106(D11), 12039-12053. doi:10.1029/2000jd900848

Reidmiller, D. R., Hobbs, P. V., & Kahn, R. (2006). Aerosol Optical Properties and Particle Size Distributions on the East Coast of the United States Derived from Airborne in Situ and Remote Sensing Measurements. *Journal of the Atmospheric Sciences*, 63(3), 785-814.

Remer, L. A., Gasso, S., Hegg, D. A., Kaufman, Y. J., & Holben, B. N. (1997). Urban/Industrial Aerosol: Ground-Based Sun/Sky Radiometer and Airborne in Situ Measurements. *Journal of Geophysical Research-Atmospheres*, 102(D14), 16849-16859.

Remer, L. A., Kaufman, Y. J., & Holben, B. N. (1999). Interannual Variation of Ambient Aerosol Characteristics on the East Coast of the United States. *Journal of Geophysical Research-Atmospheres*, 104(D2), 2223-2231.

Remer, L. A., Kaufman, Y. J., Tanre, D., Mattoo, S., Chu, D. A., Martins, J. V., . . . Holben, B. N. (2005). The MODIS Aerosol Algorithm, Products, and Validation. *Journal of the Atmospheric Sciences*, 62(4), 947-973.

Richter, D. D., Ralston, C. W., & Harms, W. R. (1983). Chemical-Composition and Spatial Variation of Bulk Precipitation at a Coastal-Plain Watershed in South-Carolina. *Water Resources Research*, 19(1), 134-140. doi:10.1029/WR019i001p00134

Riddle, E. E., Voss, P. B., Stohl, A., Holcomb, D., Maczka, D., Washburn, K., & Talbot, R. W. (2006). Trajectory Model Validation Using Newly Developed Altitude-Controlled Balloons During the International Consortium for Atmospheric Research on Transport and

Transformations 2004 Campaign. *Journal of Geophysical Research: Atmospheres*, 111(D23). doi:10.1029/2006jd007456

Rigby, M., Muhle, J., Miller, B. R., Prinn, R. G., Krummel, P. B., Steele, L. P., . . . Elkins, J. W. (2010). History of Atmospheric Sf<sub>6</sub> from 1973 to 2008. *Atmospheric Chemistry and Physics*, 10(21), 10305-10320.

Roberts, J. M., Parrish, D. D., Norton, R. B., Bertman, S. B., Holloway, J. S., Trainer, M., . . . Forbes, G. (1996). Episodic Removal of Noy Species from the Marine Boundary Layer over the North Atlantic. *Journal of Geophysical Research-Atmospheres*, 101(D22), 28947-28960.

Roberts, J. M., Bertman, S. B., Parrish, D. D., Fehsenfeld, F. C., Jobson, B. T., & Niki, H. (1998). Measurement of Alkyl Nitrates at Chebogue Point, Nova Scotia During the 1993 North Atlantic Regional Experiment (Nare) Intensive. *Journal of Geophysical Research-Atmospheres*, 103(D11), 13569-13580.

Robertson, L. B., Stevenson, D. S., & Conen, F. (2005). Test of a Northwards-Decreasing Rn-222 Source Term by Comparison of Modelled and Observed Atmospheric Rn-222 Concentrations. *Tellus Series B-Chemical and Physical Meteorology*, 57(2), 116-123.

Robson, J., Sutton, R. T., Archibald, A., Cooper, F., Christensen, M., Gray, L. J., . . . Yang, M. X. (2018). Recent Multivariate Changes in the North Atlantic Climate System, with a Focus on 2005-2016. *International Journal of Climatology*, 38(14), 5050-5076.

Rogers, R. R., Hostetler, C. A., Hair, J. W., Ferrare, R. A., Liu, Z., Obland, M. D., . . . Winker, D. M. (2011). Assessment of the Calipso Lidar 532 Nm Attenuated Backscatter Calibration Using the Nasa Larc Airborne High Spectral Resolution Lidar. *Atmospheric Chemistry and Physics*, 11(3), 1295-1311. doi:10.5194/acp-11-1295-2011

Rogers, R. R., Vaughan, M. A., Hostetler, C. A., Burton, S. P., Ferrare, R. A., Young, S. A., . . . Winker, D. M. (2014). Looking through the Haze: Evaluating the Calipso Level 2 Aerosol Optical Depth Using Airborne High Spectral Resolution Lidar Data. *Atmospheric Measurement Techniques*, 7(12), 4317-4340. doi:10.5194/amt-7-4317-2014

Rogers, H. M., Ditto, J. C., & Gentner, D. R. (2019). Evidence for Impacts on Surface-Level Air Quality in the Northeastern U.S. From Long-Distance Transport of Smoke from North American Fires During LISTOS 2018. *Atmos. Chem. Phys. Discuss.*, 2019, 1-22. doi:10.5194/acp-2019-700

Root, B., Knight, P., Young, G., Greybush, S., Grumm, R., Holmes, R., & Ross, J. (2007). A Fingerprinting Technique for Major Weather Events. *Journal of Applied Meteorology and Climatology*, 46(7), 1053-1066. doi:10.1175/jam2509.1

Russell, P. B., Hobbs, P. V., & Stowe, L. L. (1999). Aerosol Properties and Radiative Effects in the United States East Coast Haze Plume: An Overview of the Tropospheric Aerosol Radiative Forcing Observational Experiment (TARFOX). *Journal of Geophysical Research-Atmospheres*, 104(D2), 2213-2222.

Russell, P. B., Redemann, J., Schmid, B., Bergstrom, R. W., Livingston, J. M., McIntosh, D. M., . . . Remer, L. (2002). Comparison of Aerosol Single Scattering Albedos Derived by Diverse Techniques in Two North Atlantic Experiments. *Journal of the Atmospheric Sciences*, 59(3), 609-619.

Russell, K. M., Keene, W. C., Maben, J. R., Galloway, J. N., & Moody, J. L. (2003). Phase Partitioning and Dry Deposition of Atmospheric Nitrogen at the Mid-Atlantic U.S. Coast. *Journal of Geophysical Research: Atmospheres*, 108(D21). doi:10.1029/2003jd003736

- Russell, L. M., Mensah, A. A., Fischer, E. V., Sive, B. C., Varner, R. K., Keene, W. C., . . . Pszenny, A. A. P. (2007). Nanoparticle Growth Following Photochemical Alpha- and Beta-Pinene Oxidation at Appledore Island During International Consortium for Research on Transport and Transformation/Chemistry of Halogens at the Isles of Shoals 2004. *Journal of Geophysical Research-Atmospheres*, 112(D10). doi:10.1029/2006jd007736
- Russell, L. M., Hawkins, L. N., Frossard, A. A., Quinn, P. K., & Bates, T. S. (2010). Carbohydrate-Like Composition of Submicron Atmospheric Particles and Their Production from Ocean Bubble Bursting. *Proceedings of the National Academy of Sciences of the United States of America*, 107(15), 6652-6657.
- Rutledge, C. K., Schuster, G. L., Charlock, T. P., Denn, F. M., Smith, W. L., Fabbri, B. E., . . . Knapp, R. J. (2006). Offshore Radiation Observations for Climate Research at the Ceres Ocean Validation Experiment - a New "Laboratory" for Retrieval Algorithm Testing. *Bulletin of the American Meteorological Society*, 87(9), 1211-1222.
- Saikawa, E., Prinn, R. G., Dlugokencky, E., Ishijima, K., Dutton, G. S., Hall, B. D., . . . Elkins, J. W. (2014). Global and Regional Emissions Estimates for N<sub>2</sub>O. *Atmospheric Chemistry and Physics*, 14(9), 4617-4641.
- Salmon, O. E., Shepson, P. B., Ren, X., He, H., Hall, D. L., Dickerson, R. R., . . . Thornton, J. A. (2018). Top-Down Estimates of NO<sub>x</sub> and CO Emissions from Washington, Dc-Baltimore During the Winter Campaign. *Journal of Geophysical Research-Atmospheres*, 123(14), 7705-7724. doi:10.1029/2018jd028539
- Sanchez, K. J., Chen, C. L., Russell, L. M., Betha, R., Liu, J., Price, D. J., . . . Behrenfeld, M. J. (2018). Substantial Seasonal Contribution of Observed Biogenic Sulfate Particles to Cloud Condensation Nuclei. *Scientific Reports*, 8. doi:10.1038/s41598-018-21590-9
- Sanders, F. (1986). Explosive Cyclogenesis in the West-Central North Atlantic Ocean, 1981–84. Part I: Composite Structure and Mean Behavior. *Monthly Weather Review*, 114(10), 1781-1794. doi:10.1175/1520-0493(1986)114<1781:ecitwc>2.0.co;2
- Sanders, F., & Bosart, L. F. (1985). Mesoscale Structure in the Megalopolitan Snowstorm, 11–12 February 1983. Part II: Doppler Radar Study of the New England Snowband. *Journal of the Atmospheric Sciences*, 42(13), 1398-1407. doi:10.1175/1520-0469(1985)042<1398:msitms>2.0.co;2
- Sanders, F., & Gyakum, J. R. (1980). Synoptic-Dynamic Climatology of the "Bomb". *Monthly Weather Review*, 108(10), 1589-1606. doi:10.1175/1520-0493(1980)108<1589:sdcot>2.0.co;2
- Savoie, D. L., & Prospero, J. M. (1977). Aerosol Concentration Statistics for Northern Tropical Atlantic. *Journal of Geophysical Research-Oceans and Atmospheres*, 82(37), 5954-5964.
- Savoie, D. L., Prospero, J. M., & Nees, R. T. (1987). Washout Ratios of Nitrate, Non-Sea-Salt Sulfate and Sea-Salt on Virginia Key, Florida and on American-Samoa. *Atmospheric Environment*, 21(1), 103-112. doi:10.1016/0004-6981(87)90275-7
- Savoie, D. L., Arimoto, R., Keene, W. C., Prospero, J. M., Duce, R. A., & Galloway, J. N. (2002). Marine Biogenic and Anthropogenic Contributions to Non-Sea-Salt Sulfate in the Marine Boundary Layer over the North Atlantic Ocean. *Journal of Geophysical Research-Atmospheres*, 107(D18).

- Sawamura, P., Muller, D., Hoff, R. M., Hostetler, C. A., Ferrare, R. A., Hair, J. W., . . . Holben, B. N. (2014). Aerosol Optical and Microphysical Retrievals from a Hybrid Multiwavelength Lidar Data Set - Discover-Aq 2011. *Atmospheric Measurement Techniques*, 7(9), 3095-3112. doi:10.5194/amt-7-3095-2014
- Schlager, H., Konopka, P., Schulte, P., Schumann, U., Ziereis, H., Arnold, F., . . . Ovarlez, J. (1997). In Situ Observations of Air Traffic Emission Signatures in the North Atlantic Flight Corridor. *Journal of Geophysical Research-Atmospheres*, 102(D9), 10739-10750.
- Schnell, R. C., Bridgman, H. A., Naegle, P. S., & Watson, T. B. (1987). The National Oceanic and Atmospheric Administration WP-3D Meteorological, Aerosol, and Gas Systems, and Flight Operations, on Watox-86. *Global Biogeochemical Cycles*, 1(4), 297-307.
- Schroder, J. C., Campuzano-Jost, P., Day, D. A., Shah, V., Larson, K., Sommers, J. M., . . . Jimenez, J. L. (2018). Sources and Secondary Production of Organic Aerosols in the Northeastern United States During WINTER. *Journal of Geophysical Research-Atmospheres*, 123(14), 7771-7796.
- Schultz, D. M., Keyser, D., & Bosart, L. F. (1998). The Effect of Large-Scale Flow on Low-Level Frontal Structure and Evolution in Midlatitude Cyclones. *Monthly Weather Review*, 126(7), 1767-1791. doi:10.1175/1520-0493(1998)126<1767:teolsf>2.0.co;2
- Scott, D. B., Collins, E. S., Gayes, P. T., & Wright, E. (2003). Records of Prehistoric Hurricanes on the South Carolina Coast Based on Micropaleontological and Sedimentological Evidence, with Comparison to Other Atlantic Coast Records. *Geological Society of America Bulletin*, 115(9), 1027-1039. doi:10.1130/B25011.1
- Scudlark, J. R., Russell, K. M., Galloway, J. N., Church, T. M., & Keene, W. C. (1998). Organic Nitrogen in Precipitation at the Mid-Atlantic U.S. Coast—Methods Evaluation and Preliminary Measurements. *Atmospheric Environment*, 32(10), 1719-1728. doi:10.1016/S1352-2310(97)00458-5
- Seaman, N. L., & Michelson, S. A. (2000). Mesoscale Meteorological Structure of a High-Ozone Episode During the 1995 NARSTO-Northeast Study. *Journal of Applied Meteorology*, 39(3), 384-398. doi:10.1175/1520-0450(2000)039<0384:mmsoah>2.0.co;2
- Sedwick, P. N., Sholkovitz, E. R., & Church, T. M. (2007). Impact of Anthropogenic Combustion Emissions on the Fractional Solubility of Aerosol Iron: Evidence from the Sargasso Sea. *Geochemistry Geophysics Geosystems*, 8.
- Serra, N., Avellaneda, N. M., & Stammer, D. (2014). Large-Scale Impact of Saharan Dust on the North Atlantic Ocean Circulation. *Journal of Geophysical Research-Oceans*, 119(2), 704-730.
- Sethuraman, S., Riordan, A. J., Holt, T., Stunder, M., & Hinman, J. (1986). Observations of the Marine Boundary-Layer Thermal Structure over the Gulf-Stream During a Cold Air Outbreak. *Journal of Climate and Applied Meteorology*, 25(1), 14-21.
- Shah, V., Jaegle, L., Thornton, J. A., Lopez-Hilfiker, F. D., Lee, B. H., Schroder, J. C., . . . Brown, S. S. (2018). Chemical Feedbacks Weaken the Wintertime Response of Particulate Sulfate and Nitrate to Emissions Reductions over the Eastern United States. *Proceedings of the National Academy of Sciences of the United States of America*, 115(32), 8110-8115.
- Shah, V., Jaegle, L., Jimenez, J. L., Schroder, J. C., Campuzano-Jost, P., Campos, T. L., . . . Thornton, J. A. (2019). Widespread Pollution from Secondary Sources of Organic Aerosols



During Winter in the Northeastern United States. *Geophysical Research Letters*, 46(5), 2974-2983. doi:10.1029/2018gl081530

Sharma, S., Barrie, L. A., Plummer, D., McConnell, J. C., Brickell, P. C., Levasseur, M., . . . Bates, T. S. (1999). Flux Estimation of Oceanic Dimethyl Sulfide around North America. *Journal of Geophysical Research-Atmospheres*, 104(D17), 21327-21342.

doi:10.1029/1999jd900207

Shelley, R. U., Sedwick, P. N., Bibby, T. S., Cabedo-Sanz, P., Church, T. M., Johnson, R. J., . . . Lohan, M. C. (2012). Controls on Dissolved Cobalt in Surface Waters of the Sargasso Sea: Comparisons with Iron and Aluminum. *Global Biogeochemical Cycles*, 26.

Shinozuka, Y., Johnson, R. R., Flynn, C. J., Russell, P. B., Schmid, B., Redemann, J., . . . Burton, S. P. (2013). Hyperspectral Aerosol Optical Depths from TCAP Flights. *Journal of Geophysical Research-Atmospheres*, 118(21), 12180-12194. doi:10.1002/2013jd020596

Shinozuka, Y., Clarke, A. D., Nenes, A., Jefferson, A., Wood, R., McNaughton, C. S., . . . Yoon, Y. J. (2015). The Relationship between Cloud Condensation Nuclei (Ccn) Concentration and Light Extinction of Dried Particles: Indications of Underlying Aerosol Processes and Implications for Satellite-Based Ccn Estimates. *Atmospheric Chemistry and Physics*, 15(13), 7585-7604. doi:10.5194/acp-15-7585-2015

Shipham, M. C., Bachmeier, A. S., & Anderson, B. E. (1993). CITE-3 Meteorological Highlights. *Journal of Geophysical Research-Atmospheres*, 98(D12), 23305-23324.

doi:10.1029/93jd02012

Shoeib, M., Vlahos, P., Hamer, T., Peters, A., Graustein, M., & Narayan, J. (2010). Survey of Polyfluorinated Chemicals (Pfc) in the Atmosphere over the Northeast Atlantic Ocean. *Atmospheric Environment*, 44(24), 2887-2893.

Sholkovitz, E. R., & Sedwick, P. N. (2006). Open-Ocean Deployment of a Buoy-Mounted Aerosol Sampler on the Bermuda Testbed Mooring: Aerosol Iron and Sea Salt over the Sargasso Sea. *Deep-Sea Research Part I-Oceanographic Research Papers*, 53(3), 547-560.

Sholkovitz, E. R., Church, T. M., & Arimoto, R. (1993). Rare-Earth Element Composition of Precipitation, Precipitation Particles, and Aerosols. *Journal of Geophysical Research-Atmospheres*, 98(D11), 20587-20599.

Sholkovitz, E. R., Sedwick, P. N., & Church, T. M. (2009). Influence of Anthropogenic Combustion Emissions on the Deposition of Soluble Aerosol Iron to the Ocean: Empirical Estimates for Island Sites in the North Atlantic. *Geochimica Et Cosmochimica Acta*, 73(14), 3981-4003.

Sholkovitz, E. R., Sedwick, P. N., & Church, T. M. (2010). On the Fractional Solubility of Copper in Marine Aerosols: Toxicity of Aeolian Copper Revisited. *Geophysical Research Letters*, 37.

Sholkovitz, E. R., Sedwick, P. N., Church, T. M., Baker, A. R., & Powell, C. F. (2012). Fractional Solubility of Aerosol Iron: Synthesis of a Global-Scale Data Set. *Geochimica Et Cosmochimica Acta*, 89, 173-189.

Shreffler, J. H., & Barnes, H. M. (1996). Estimation of Trends in Atmospheric Concentrations of Sulfate in the Northeastern United States. *Journal of the Air & Waste Management Association*, 46(7), 621-630. doi:10.1080/10473289.1996.10467496

Shunthirasingham, C., Oyiliagu, C. E., Cao, X. S., Gouin, T., Wania, F., Lee, S. C., . . . Muir, D. C. G. (2010). Spatial and Temporal Pattern of Pesticides in the Global Atmosphere. *Journal of Environmental Monitoring*, 12(9), 1650-1657.

Siddique, R., Mejia, A., Brown, J., Reed, S., & Ahnert, P. (2015). Verification of Precipitation Forecasts from Two Numerical Weather Prediction Models in the Middle Atlantic Region of the USA: A Precursory Analysis to Hydrologic Forecasting. *Journal of Hydrology*, 529, 1390-1406. doi:<https://doi.org/10.1016/j.jhydrol.2015.08.042>

Sienkiewicz, J. M., Locatelli, J. D., Hobbs, P. V., & Geerts, B. (1989). Organization and Structure of Clouds and Precipitation on the Mid-Atlantic Coast of the United States. Part II: The Mesoscale and Microscale Structures of Some Frontal Rainbands. *Journal of the Atmospheric Sciences*, 46(10), 1349-1364. doi:10.1175/1520-0469(1989)046<1349:oasoca>2.0.co;2

Sierau, B., Covert, D. S., Coffman, D. J., Quinn, P. K., & Bates, T. S. (2006). Aerosol Optical Properties During the 2004 New England Air Quality Study—Intercontinental Transport and Chemical Transformation: Gulf of Maine Surface Measurements—Regional and Case Studies. *Journal of Geophysical Research: Atmospheres*, 111(D23). doi:10.1029/2006jd007568

Sievering, H., Ennis, G., Gorman, E., & Nagamoto, C. (1990). Size Distributions and Statistical Analysis of Nitrate, Excess Sulfate, and Chloride Deficit in the Marine Boundary Layer During GCE/CASE/WATOX. *Global Biogeochemical Cycles*, 4(4), 395-405.

Sievering, H., Boatman, J., Galloway, J., Keene, W., Kim, Y., Luria, M., & Ray, J. (1991). Heterogeneous Sulfur Conversion in Sea-Salt Aerosol-Particles - the Role of Aerosol Water-Content and Size Distribution. *Atmospheric Environment Part a-General Topics*, 25(8), 1479-1487.

Sigler, J. M., Mao, H., & Talbot, R. (2009). Gaseous Elemental and Reactive Mercury in Southern New Hampshire. *Atmospheric Chemistry and Physics*, 9(6), 1929-1942. doi:10.5194/acp-9-1929-2009

Simon, H., Valin, L. C., Baker, K. R., Henderson, B. H., Crawford, J. H., Pusede, S. E., . . . Fried, A. (2018). Characterizing CO and NO<sub>y</sub> Sources and Relative Ambient Ratios in the Baltimore Area Using Ambient Measurements and Source Attribution Modeling. *Journal of Geophysical Research-Atmospheres*, 123(6), 3304-3320. doi:10.1002/2017jd027688

Singh, H. B., Thompson, A. M., & Schlager, H. (1999). SONEX Airborne Mission and Coordinated POLINAT-2 Activity: Overview and Accomplishments. *Geophysical Research Letters*, 26(20), 3053-3056.

Singh, H., Chen, Y., Tabazadeh, A., Fukui, Y., Bey, I., Yantosca, R., . . . Kondo, Y. (2000). Distribution and Fate of Selected Oxygenated Organic Species in the Troposphere and Lower Stratosphere over the Atlantic. *Journal of Geophysical Research-Atmospheres*, 105(D3), 3795-3805.

Singh, H. B., Anderson, B. E., Avery, M. A., Viezee, W., Chen, Y., Tabazadeh, A., . . . Hannan, J. R. (2002). Global Distribution and Sources of Volatile and Nonvolatile Aerosol in the Remote Troposphere. *Journal of Geophysical Research-Atmospheres*, 107(D11). doi:10.1029/2001jd000486

Singh, H. B., Brune, W. H., Crawford, J. H., Jacob, D. J., & Russell, P. B. (2006). Overview of the Summer 2004 Intercontinental Chemical Transport Experiment - North America (INTEX-A). *Journal of Geophysical Research-Atmospheres*, 111(D24).

- Sinreich, R., Filsinger, F., Friess, U., Platt, U., Sebastian, O., Wagner, T., . . . Kern, C. (2007). Max-Doas Detection of Glyoxal During Icartt 2004. *Atmospheric Chemistry and Physics*, 7, 1293-1303. doi:10.5194/acp-7-1293-2007
- Sive, B. C., Zhou, Y., Troop, D., Wang, Y., Little, W. C., Wingenter, O. W., . . . Talbot, R. (2005). Development of a Cryogen-Free Concentration System for Measurements of Volatile Organic Compounds. *Analytical Chemistry*, 77(21), 6989-6998. doi:10.1021/ac0506231
- Slemr, F., Weigelt, A., Ebinghaus, R., Bieser, J., Brenninkmeijer, C. A. M., Rauthe-Schöch, A., . . . Ziereis, H. (2018). Mercury Distribution in the Upper Troposphere and Lowermost Stratosphere According to Measurements by the Iagos-Caribic Observatory: 2014–2016. *Atmos. Chem. Phys.*, 18(16), 12329-12343. doi:10.5194/acp-18-12329-2018
- Smirnov, A., Holben, B. N., Dubovik, O., O'Neill, N. T., Remer, L. A., Eck, T. F., . . . Savoie, D. (2000). Measurement of Atmospheric Optical Parameters on Us Atlantic Coast Sites, Ships, and Bermuda During TARFOX. *Journal of Geophysical Research-Atmospheres*, 105(D8), 9887-9901.
- Smirnov, A., Holben, B. N., Dubovik, O., Frouin, R., Eck, T. F., & Slutsker, I. (2003). Maritime Component in Aerosol Optical Models Derived from Aerosol Robotic Network Data. *Journal of Geophysical Research-Atmospheres*, 108(D1). doi:10.1029/2002jd002701
- Smith, S. J., Pitcher, H., & Wigley, T. M. L. (2001). Global and Regional Anthropogenic Sulfur Dioxide Emissions. *Global and Planetary Change*, 29(1-2), 99-119. doi:10.1016/S0921-8181(00)00057-6
- Smith, W. L., Charlock, T. P., Kahn, R., Martins, J. V., Remer, L. A., Hobbs, P. V., . . . Rutledge, C. K. (2005a). Eos Terra Aerosol and Radiative Flux Validation: An Overview of the Chesapeake Lighthouse and Aircraft Measurements for Satellites (CLAMS) Experiment. *Journal of the Atmospheric Sciences*, 62(4), 903-918.
- Smith, W. L., Zhou, D. K., Larar, A. M., Mango, S. A., Howell, H. B., Knuteson, R. O., . . . Smith, W. L. (2005b). The NPOESS Airborne Sounding Testbed Interferometer - Remotely Sensed Surface and Atmospheric Conditions During Clams. *Journal of the Atmospheric Sciences*, 62(4), 1118-1134.
- Smith, A. M., Keene, W. C., Maben, J. R., Pszenny, A. A. P., Fischer, E., & Stohl, A. (2007). Ammonia Sources, Transport, Transformation, and Deposition in Coastal New England During Summer. *Journal of Geophysical Research-Atmospheres*, 112(D10).
- Snow, J. A., Heikes, B. G., Shen, H. W., O'Sullivan, D. W., Fried, A., & Walega, J. (2007). Hydrogen Peroxide, Methyl Hydroperoxide, and Formaldehyde over North America and the North Atlantic. *Journal of Geophysical Research-Atmospheres*, 112(D12).
- Sommariva, R., de Gouw, J. A., Trainer, M., Atlas, E., Goldan, P. D., Kuster, W. C., . . . Fehsenfeld, F. C. (2011). Emissions and Photochemistry of Oxygenated Vocs in Urban Plumes in the Northeastern United States. *Atmospheric Chemistry and Physics*, 11(14), 7081-7096.
- Song, F., Young Shin, J., Jusino-Atresino, R., & Gao, Y. (2011). Relationships among the Springtime Ground-Level NO<sub>x</sub>, O<sub>3</sub> and NO<sub>3</sub> in the Vicinity of Highways in the US East Coast. *Atmospheric Pollution Research*, 2(3), 374-383. <https://doi.org/10.5094/APR.2011.042>
- Soulen, P. F., King, M. D., Tsay, S. C., Arnold, G. T., & Li, J. Y. (2000). Airborne Spectral Measurements of Surface-Atmosphere Anisotropy During the Scar-a, Kuwait Oil Fire,

and TARFOX Experiments. *Journal of Geophysical Research-Atmospheres*, 105(D8), 10203-10218.

Spicer, C. W. (1982). Nitrogen-Oxide Reactions in the Urban Plume of Boston. *Science*, 215(4536), 1095-1097.

Spicer, C. W., Kenny, D. V., Chapman, E., Busness, K. M., & Berkowitz, C. M. (1996). Observations of Dimethyl Sulfide over the Western North Atlantic Ocean Using an Airborne Tandem Mass Spectrometer. *Journal of Geophysical Research-Atmospheres*, 101(D22), 29137-29147.

Stage, S. A., & Weller, R. A. (1985). The Frontal Air-Sea Interaction Experiment (Fasinex) .1. Background and Scientific Objectives. *Bulletin of the American Meteorological Society*, 66(12), 1511-1520.

Stage, S. A., & Weller, R. A. (1986). The Frontal Air-Sea Interaction Experiment (FASINEX) .2. Experimental Plan. *Bulletin of the American Meteorological Society*, 67(1), 16-20.

Stamnes, S., Hostetler, C., Ferrare, R., Burton, S., Liu, X., Hair, J., . . . Cairns, B. (2018). Simultaneous Polarimeter Retrievals of Microphysical Aerosol and Ocean Color Parameters from the "MAPP" Algorithm with Comparison to High-Spectral-Resolution Lidar Aerosol and Ocean Products. *Applied Optics*, 57(10), 2394-2413. doi:10.1364/Ao.57.002394

Stark, H., Brown, S. S., Goldan, P. D., Aldener, M., Kuster, W. C., Jakoubek, R., . . . Ravishankara, A. R. (2007). Influence of Nitrate Radical on the Oxidation of Dimethyl Sulfide in a Polluted Marine Environment. *Journal of Geophysical Research-Atmospheres*, 112(D10). doi:10.1029/2006jd007669

Stauffer, R. M., & Thompson, A. M. (2015). Bay Breeze Climatology at Two Sites Along the Chesapeake Bay from 1986-2010: Implications for Surface Ozone. *Journal of Atmospheric Chemistry*, 72(3-4), 355-372. doi:10.1007/s10874-013-9260-y

Steen-Larsen, H. C., Sveinbjornsdottir, A. E., Peters, A. J., Masson-Delmotte, V., Guishard, M. P., Hsiao, G., . . . White, J. W. C. (2014). Climatic Controls on Water Vapor Deuterium Excess in the Marine Boundary Layer of the North Atlantic Based on 500 Days of in Situ, Continuous Measurements. *Atmospheric Chemistry and Physics*, 14(15), 7741-7756.

Steinberg, D. K., Carlson, C. A., Bates, N. R., Johnson, R. J., Michaels, A. F., & Knap, A. H. (2001). Overview of the US JGOFS Bermuda Atlantic Time-Series Study (BATS): A Decade-Scale Look at Ocean Biology and Biogeochemistry. *Deep-Sea Research Part II-Topical Studies in Oceanography*, 48(8-9), 1405-1447.

Stewart, R. E. (1991). Canadian Atlantic Storms Program - Progress and Plans of the Meteorological Component. *Bulletin of the American Meteorological Society*, 72(3), 364-371.

Stohl, A., Trainer, M., Ryerson, T. B., Holloway, J. S., & Parrish, D. D. (2002). Export of Noy from the North American Boundary Layer During 1996 and 1997 North Atlantic Regional Experiments. *Journal of Geophysical Research-Atmospheres*, 107(D11).

Stohl, A., Cooper, O. R., Damoah, R., Fehsenfeld, F. C., Forster, C., Hsie, E. Y., . . . Trainer, M. (2004). Forecasting for a Lagrangian Aircraft Campaign. *Atmospheric Chemistry and Physics*, 4, 1113-1124.

Stratmann, G., Ziereis, H., Stock, P., Brenninkmeijer, C. A. M., Zahn, A., Rauthe-Schöch, A., . . . Volz-Thomas, A. (2016). No and Noy in the Upper Troposphere: Nine Years of

Caribic Measurements Onboard a Passenger Aircraft. *Atmospheric Environment*, 133, 93-111. doi:<https://doi.org/10.1016/j.atmosenv.2016.02.035>

Stunder, B. J. B., Artz, R. S., & Rolph, G. D. (1987). Watox Meteorological Overview for January 1986 WP-3D Aircraft Intensive. *Global Biogeochemical Cycles*, 1(4), 283-295.

Stunder, B. J. B., Artz, R. S., Rolph, G. D., Harris, J. M., & Merrill, J. T. (1990). Summary of Meteorological Conditions over the North Atlantic Ocean During GCE/CASE/WATOX. *Global Biogeochemical Cycles*, 4(2), 133-150.

Stutz, J., Pikelnaya, O., Hurlock, S. C., Trick, S., Pechtl, S., & von Glasow, R. (2007). Daytime Oio in the Gulf of Maine. *Geophysical Research Letters*, 34(22). doi:10.1029/2007gl031332

Su, W. Y., Charlock, T. P., & Rutledge, K. (2002). Observations of Reflectance Distribution around Sun glint from a Coastal Ocean Platform. *Applied Optics*, 41(35), 7369-7383.

Sublette, M. S., & Young, G. S. (1996). Warm-Season Effects of the Gulf Stream on Mesoscale Characteristics of the Atmospheric Boundary Layer. *Monthly Weather Review*, 124(4), 653-667.

Sullivan, A. P., Guo, H., Schroder, J. C., Campuzano-Jost, P., Jimenez, J. L., Campos, T., . . . Weber, R. J. (2019). Biomass Burning Markers and Residential Burning in the Winter Aircraft Campaign. *Journal of Geophysical Research-Atmospheres*, 124(3), 1846-1861. doi:10.1029/2017jd028153

Sullivan, A. P., Peltier, R. E., Brock, C. A., de Gouw, J. A., Holloway, J. S., Warneke, C., . . . Weber, R. J. (2006). Airborne Measurements of Carbonaceous Aerosol Soluble in Water over Northeastern United States: Method Development and an Investigation into Water-Soluble Organic Carbon Sources. *Journal of Geophysical Research-Atmospheres*, 111(D23).

Sullivan, J. T., Berkoff, T., Gronoff, G., Knepp, T., Pippin, M., Allen, D., . . . McGee, T. J. (2019). The Ozone Water-Land Environmental Transition Study: An Innovative Strategy for Understanding Chesapeake Bay Pollution Events. *Bulletin of the American Meteorological Society*, 100(2), 291-306. doi:10.1175/Bams-D-18-0025.1

Sweet, W., Fett, R., Kerling, J., & Laviolette, P. (1981). Air-Sea Interaction Effects in the Lower Troposphere across the North Wall of the Gulf-Stream. *Monthly Weather Review*, 109(5), 1042-1052.

Talbot, R., Mao, H., & Sive, B. (2005). Diurnal Characteristics of Surface Level O<sub>3</sub> and Other Important Trace Gases in New England. *Journal of Geophysical Research: Atmospheres*, 110(D9). doi:10.1029/2004jd005449

Tanner, R. L., Zielinska, B., Uberna, E., Harshfield, G., & McNichol, A. P. (1996). Concentrations of Carbonyl Compounds and the Carbon Isotopy of Formaldehyde at a Coastal Site in Nova Scotia During the Nare Summer Intensive. *Journal of Geophysical Research-Atmospheres*, 101(D22), 28961-28970.

Tanre, D., Remer, L. A., Kaufman, Y. J., Mattoo, S., Hobbs, P. V., Livingston, J. M., . . . Smirnov, A. (1999). Retrieval of Aerosol Optical Thickness and Size Distribution over Ocean from the Modis Airborne Simulator During Tarfox. *Journal of Geophysical Research-Atmospheres*, 104(D2), 2261-2278.

Tarasova, O. A., Brenninkmeijer, C. A. M., Jockel, P., Zvyagintsev, A. M., & Kuznetsov, G. I. (2007). A Climatology of Surface Ozone in the Extra Tropics: Cluster Analysis of Observations and Model Results. *Atmospheric Chemistry and Physics*, 7(24), 6099-6117.

Taubman, B. F., Marufu, L. T., Vant-Hull, B. L., Piety, C. A., Doddridge, B. G., Dickerson, R. R., & Li, Z. Q. (2004). Smoke over Haze: Aircraft Observations of Chemical and Optical Properties and the Effects on Heating Rates and Stability. *Journal of Geophysical Research-Atmospheres*, 109(D2).

Taubman, B. F., Hains, J. C., Thompson, A. M., Marufu, L. T., Doddridge, B. G., Stehr, J. W., . . . Dickerson, R. R. (2006). Aircraft Vertical Profiles of Trace Gas and Aerosol Pollution over the Mid-Atlantic United States: Statistics and Meteorological Cluster Analysis. *Journal of Geophysical Research-Atmospheres*, 111(D10).

Thompson, A. M., Sparling, L. C., Kondo, Y., Anderson, B. E., Gregory, G. L., & Sachse, G. W. (1999). Perspectives on No, Noy and Fine Aerosol Sources and Variability During Sonex. *Geophysical Research Letters*, 26(20), 3073-3076.

Thompson, A. M., Doddridge, B. G., Witte, J. C., Hudson, R. D., Luke, W. T., Johnston, J. E., . . . Weller, R. (2000). A Tropical Atlantic Paradox: Shipboard and Satellite Views of a Tropospheric Ozone Maximum and Wave-One in January-February 1999. *Geophysical Research Letters*, 27(20), 3317-3320.

Thompson, A. M., Stone, J. B., Witte, J. C., Miller, S. K., Pierce, R. B., Chatfield, R. B., . . . Cammas, J. P. (2007a). Intercontinental Chemical Transport Experiment Ozonesonde Network Study (IONS) 2004: 1. Summertime Upper Troposphere/Lower Stratosphere Ozone over Northeastern North America. *Journal of Geophysical Research-Atmospheres*, 112(D12).

Thompson, A. M., Stone, J. B., Witte, J. C., Miller, S. K., Oltmans, S. J., Kucsera, T. L., . . . Johnson, J. E. (2007b). Intercontinental Chemical Transport Experiment Ozonesonde Network Study (IONS) 2004: 2. Tropospheric Ozone Budgets and Variability over Northeastern North America. *Journal of Geophysical Research-Atmospheres*, 112(D12).

Thompson, R. L., Chevallier, F., Crotwell, A. M., Dutton, G., Langenfelds, R. L., Prinn, R. G., . . . Aoki, S. (2014). Nitrous Oxide Emissions 1999 to 2009 from a Global Atmospheric Inversion. *Atmospheric Chemistry and Physics*, 14(4), 1801-1817.

Thompson, A. M., Stauffer, R. M., Miller, S. K., Martins, D. K., Joseph, E., Weinheimer, A. J., & Diskin, G. S. (2015). Ozone Profiles in the Baltimore-Washington Region (2006-2011): Satellite Comparisons and Discover-Aq Observations. *Journal of Atmospheric Chemistry*, 72(3-4), 393-422. doi:10.1007/s10874-014-9283-z

Thornhill, K. L., Chen, G., Dibb, J., Jordan, C. E., Omar, A., Winstead, E. L., . . . Anderson, B. E. (2008). The Impact of Local Sources and Long-Range Transport on Aerosol Properties over the Northeast US Region During INTEX-NA. *Journal of Geophysical Research-Atmospheres*, 113(D8).

Tian, Z. L., Ollivier, P., Veron, A., & Church, T. M. (2008). Atmospheric Fe Deposition Modes at Bermuda and the Adjacent Sargasso Sea. *Geochemistry Geophysics Geosystems*, 9.

Titos, G., Jefferson, A., Sheridan, P. J., Andrews, E., Lyamani, H., Alados-Arboledas, L., & Ogren, J. A. (2014). Aerosol Light-Scattering Enhancement Due to Water Uptake During the TCAP Campaign. *Atmospheric Chemistry and Physics*, 14(13), 7031-7043.

- Todd, D. L., Keene, W. C., Moody, J. L., Maring, H., & Galloway, J. N. (2003). Effects of Wet Deposition on Optical Properties of the Atmosphere over Bermuda and Barbados. *Journal of Geophysical Research-Atmospheres*, 108(D3). doi:10.1029/2001jd001084
- Tomza, U., Arimoto, R., & Ray, B. J. (2001). Color-Related Differences in the Chemical Composition of Aerosol-Laden Filters. *Atmospheric Environment*, 35(9), 1703-1709.
- Trapp, J. M., Millero, F. J., & Prospero, J. M. (2010). Temporal Variability of the Elemental Composition of African Dust Measured in Trade Wind Aerosols at Barbados and Miami. *Marine Chemistry*, 120(1-4), 71-82.
- Trickl, T., Cooper, O. R., Eisele, H., James, P., Mucke, R., & Stohl, A. (2003). Intercontinental Transport and Its Influence on the Ozone Concentrations over Central Europe: Three Case Studies. *Journal of Geophysical Research-Atmospheres*, 108(D12).
- Turekian, V. C., Macko, S. A., & Keene, W. C. (2001). Application of Stable Sulfur Isotopes to Differentiate Sources of Size-Resolved Particulate Sulfate in Polluted Marine Air at Bermuda During Spring. *Geophysical Research Letters*, 28(8), 1491-1494.
- Turekian, V. C., Macko, S. A., & Keene, W. C. (2003). Concentrations, Isotopic Compositions, and Sources of Size-Resolved, Particulate Organic Carbon and Oxalate in near-Surface Marine Air at Bermuda During Spring. *Journal of Geophysical Research-Atmospheres*, 108(D5).
- Turner, A. J., Jacob, D. J., Benmergui, J., Wofsy, S. C., Maasackers, J. D., Butz, A., . . . Biraud, S. C. (2016). A Large Increase in Us Methane Emissions over the Past Decade Inferred from Satellite Data and Surface Observations. *Geophysical Research Letters*, 43(5), 2218-2224.
- Tzortziou, M., Herman, J. R., Cede, A., Loughner, C. P., Abuhassan, N., & Naik, S. (2015). Spatial and Temporal Variability of Ozone and Nitrogen Dioxide over a Major Urban Estuarine Ecosystem. *Journal of Atmospheric Chemistry*, 72(3), 287-309. doi:10.1007/s10874-013-9255-8
- Uccellini, L. W., Petersen, R. A., Kocin, P. J., Brill, K. F., & Tuccillo, J. J. (1987). Synergistic Interactions between an Upper-Level Jet Streak and Diabatic Processes That Influence the Development of a Low-Level Jet and a Secondary Coastal Cyclone. *Monthly Weather Review*, 115(10), 2227-2261. doi:10.1175/1520-0493(1987)115<2227:sibaul>2.0.co;2
- Vandemark, D., Feng, H., & Greenslade, M. E. (2016). Field Assessment of Optical Transparency in the Low-Level Marine Boundary Layer: Preliminary Data from Coastal New England Sites. *Sensors, and Command, Control, Communications, and Intelligence (C3i) Technologies for Homeland Security, Defense, and Law Enforcement Applications Xv*, 9825. doi:10.1117/12.2230728
- Vant-Hull, B., Li, Z. Q., Taubman, B. F., Levy, R., Marufu, L., Chang, F. L., . . . Dickerson, R. R. (2005). Smoke over Haze: Comparative Analysis of Satellite, Surface Radiometer, and Airborne in Situ Measurements of Aerosol Optical Properties and Radiative Forcing over the Eastern United States. *Journal of Geophysical Research-Atmospheres*, 110(D10). doi:10.1029/2004jd004518
- Veefkind, J. P., de Leeuw, G., Durkee, P. A., Russell, P. B., Hobbs, P. V., & Livingston, J. M. (1999). Aerosol Optical Depth Retrieval Using ATSR-2 and AVHRR Data During TARFOX. *Journal of Geophysical Research-Atmospheres*, 104(D2), 2253-2260.

- Veron, A. J., Church, T. M., Patterson, C. C., Erel, Y., & Merrill, J. T. (1992). Continental Origin and Industrial Sources of Trace-Metals in the Northwest Atlantic Troposphere. *Journal of Atmospheric Chemistry*, 14(1-4), 339-351.
- Veron, A. J., Church, T. M., Flegal, A. R., Patterson, C. C., & Erel, Y. (1993). Response of Lead Cycling in the Surface Sargasso Sea to Changes in Tropospheric Input. *Journal of Geophysical Research-Oceans*, 98(C10), 18269-18276.
- Veron, A. J., Church, T. M., & Flegal, A. R. (1998). Lead Isotopes in the Western North Atlantic: Transient Tracers of Pollutant Lead Inputs. *Environmental Research*, 78(2), 104-111.
- Volpe, C., & Spivack, A. J. (1994). Stable Chlorine Isotopic Composition of Marine Aerosol-Particles in the Western Atlantic-Ocean. *Geophysical Research Letters*, 21(12), 1161-1164.
- Voss, K. J., Welton, E. J., Quinn, P. K., Frouin, R., Miller, M., & Reynolds, R. M. (2001). Aerosol Optical Depth Measurements During the Aerosols99 Experiment. *Journal of Geophysical Research-Atmospheres*, 106(D18), 20811-20819.
- Vukovich, F. M., Dunn, J. W., & Crissman, B. W. (1991). Aspects of the Evolution of the Marine Boundary-Layer During Cold-Air Outbreaks Off the Southeast Coast of the United-States. *Monthly Weather Review*, 119(9), 2252-2279.
- Wadleigh, M. A. (2004). Sulphur Isotopic Composition of Aerosols over the Western North Atlantic Ocean. *Canadian Journal of Fisheries and Aquatic Sciences*, 61(5), 817-825.
- Wang, T., Carroll, M. A., Albercook, G. M., Owens, K. R., Duderstadt, K. A., Markevitch, A. N., . . . Ogren, J. (1996). Ground-Based Measurements of Nox and Total Reactive Oxidized Nitrogen (NO<sub>y</sub>) at Sable Island, Nova Scotia, During the NARE 1993 Summer Intensive. *Journal of Geophysical Research-Atmospheres*, 101(D22), 28991-29004.
- Wang, Y., Liu, S. C., Anderson, B. E., Kondo, Y., Gregory, G. L., Sachse, G. W., . . . Thompson, A. M. (2000). Evidence of Convection as a Major Source of Condensation Nuclei in the Northern Midlatitude Upper Troposphere. *Geophysical Research Letters*, 27(3), 369-372.
- Wang, X., Jacob, D. J., Eastham, S. D., Sulprizio, M. P., Zhu, L., Chen, Q., . . . Liao, H. (2019). The Role of Chlorine in Global Tropospheric Chemistry. *Atmos. Chem. Phys.*, 19(6), 3981-4003. doi:10.5194/acp-19-3981-2019
- Warnecke, G., Allison, L. J., McMillin, L. M., & Szekiolda, K.-H. (1971). Remote Sensing of Ocean Currents and Sea Surface Temperature Changes Derived from the Nimbus II Satellite. *Journal of Physical Oceanography*, 1(1), 45-60. doi:10.1175/1520-0485(1971)001<0045:rsocca>2.0.co;2
- Warneke, C., Kato, S., de Gouw, J. A., Goldan, P. D., Kuster, W. C., Shao, M., . . . Fehsenfeld, F. C. (2005). Online Volatile Organic Compound Measurements Using a Newly Developed Proton-Transfer Ion-Trap Mass Spectrometry Instrument During New England Air Quality Study: Intercontinental Transport and Chemical Transformation 2004: Performance, Intercomparison, and Compound Identification. *Environmental Science & Technology*, 39(14), 5390-5397. doi:10.1021/es050602o
- Warneke, C., de Gouw, J. A., Stohl, A., Cooper, O. R., Goldan, P. D., Kuster, W. C., . . . Kato, S. (2006). Biomass Burning and Anthropogenic Sources of CO over New England in the Summer 2004. *Journal of Geophysical Research: Atmospheres*, 111(D23). doi:10.1029/2005jd006878



- Waser, N. A. D., & Bacon, M. P. (1995). Wet Deposition Fluxes of Cosmogenic P-32 and P-33 and Variations in the P-33/P-32 Ratios at Bermuda. *Earth and Planetary Science Letters*, 133(1-2), 71-80. doi:10.1016/0012-821x(95)00073-L
- Wayland, R. J., & Raman, S. (1989). Mean and Turbulent Structure of a Baroclinic Marine Boundary-Layer During the 28 January 1986 Cold-Air Outbreak (GALE-86). *Boundary-Layer Meteorology*, 48(3), 227-254.
- Wedam, G. B., McMurdie, L. A., & Mass, C. F. (2009). Comparison of Model Forecast Skill of Sea Level Pressure Along the East and West Coasts of the United States. *Weather and Forecasting*, 24(3), 843-854. doi:10.1175/2008waf2222161.1
- Wei, W., Li, W. H., Deng, Y., Yang, S., Jiang, J. H., Huang, L., & Liu, W. T. (2018). Dynamical and Thermodynamical Coupling between the North Atlantic Subtropical High and the Marine Boundary Layer Clouds in Boreal Summer. *Climate Dynamics*, 50(7-8), 2457-2469.
- Weigelt, A., Hermann, M., van Velthoven, P. F. J., Brenninkmeijer, C. A. M., Schlaf, G., Zahn, A., & Wiedensohler, A. (2009). Influence of Clouds on Aerosol Particle Number Concentrations in the Upper Troposphere. *Journal of Geophysical Research-Atmospheres*, 114.
- WeinsteinLloyd, J. B., Daum, P. H., Nunnermacker, L. J., Lee, J. H., & Kleinmann, L. I. (1996). Measurement of Peroxides and Related Species in the 1993 North Atlantic Regional Experiment. *Journal of Geophysical Research-Atmospheres*, 101(D22), 29081-29090.
- Weller, R. A. (1991). Overview of the Frontal Air-Sea Interaction Experiment (Fasinex) - a Study of Air-Sea Interaction in a Region of Strong Oceanic Gradients. *Journal of Geophysical Research-Oceans*, 96(C5), 8501-8516.
- Weller, R. A., Rudnick, D. L., & Brink, N. J. (1995). Meteorological Variability and Air-Sea Fluxes at a Closely Spaced Array of Surface Moorings. *Journal of Geophysical Research-Oceans*, 100(C3), 4867-4883.
- Weller, R. A., Rudnick, D. L., & Brink, N. J. (1995). Meteorological Variability and Air-Sea Fluxes at a Closely Spaced Array of Surface Moorings. *Journal of Geophysical Research-Oceans*, 100(C3), 4867-4883.
- Whelpdale, D. M., Keene, W. C., Hansen, A. D. A., & Boatman, J. (1987). Aircraft Measurements of Sulfur, Nitrogen, and Carbon Species During WATOX-86. *Global Biogeochemical Cycles*, 1(4), 357-368.
- Whelpdale, D. M., Knap, A. H., & Toom, D. L. (1990). Pollutant Concentrations Upwind and Downwind of Bermuda. *Global Biogeochemical Cycles*, 4(3), 335-346.
- White, A. B., Senff, C. J., Keane, A. N., Darby, L. S., Djalalova, I. V., Ruffieux, D. C., . . . Goldstein, A. H. (2006). A Wind Profiler Trajectory Tool for Air Quality Transport Applications. *Journal of Geophysical Research: Atmospheres*, 111(D23). doi:10.1029/2006jd007475
- White, A. B., Darby, L. S., Senff, C. J., King, C. W., Banta, R. M., Koermer, J., . . . Talbot, R. (2007). Comparing the Impact of Meteorological Variability on Surface Ozone During the NEAQS (2002) and ICARTT (2004) Field Campaigns. *Journal of Geophysical Research: Atmospheres*, 112(D10). doi:10.1029/2006jd007590
- White, M. L., Russo, R. S., Zhou, Y., Mao, H., Varner, R. K., Ambrose, J., . . . Sive, B. C. (2008). Volatile Organic Compounds in Northern New England Marine and Continental

Environments During the Icartt 2004 Campaign. *Journal of Geophysical Research-Atmospheres*, 113(D8). doi:10.1029/2007jd009161

Wilczak, J., McKeen, S., Djalalova, I., Grell, G., Peckham, S., Gong, W., . . . Carmichael, G. R. (2006). Bias-Corrected Ensemble and Probabilistic Forecasts of Surface Ozone over Eastern North America During the Summer of 2004. *Journal of Geophysical Research: Atmospheres*, 111(D23). doi:10.1029/2006jd007598

Wild, O., Law, K. S., McKenna, D. S., Bandy, B. J., Penkett, S. A., & Pyle, J. A. (1996). Photochemical Trajectory Modeling Studies of the North Atlantic Region During August 1993. *Journal of Geophysical Research-Atmospheres*, 101(D22), 29269-29288.

Williams, B. J., Goldstein, A. H., Kreisberg, N. M., & Hering, S. V. (2006a). An in-Situ Instrument for Speciated Organic Composition of Atmospheric Aerosols: Thermal Desorption Aerosol GC/MS-FID (TAG). *Aerosol Science and Technology*, 40(8), 627-638. doi:10.1080/02786820600754631

Williams, E. J., Fehsenfeld, F. C., Jobson, B. T., Kuster, W. C., Goldan, P. D., Stutz, J., & McClenny, W. A. (2006b). Comparison of Ultraviolet Absorbance, Chemiluminescence, and Doas Instruments for Ambient Ozone Monitoring. *Environmental Science & Technology*, 40(18), 5755-5762. doi:10.1021/es0523542

Williams, B. J., Goldstein, A. H., Millet, D. B., Holzinger, R., Kreisberg, N. M., Hering, S. V., . . . Jimenez, J. L. (2007). Chemical Speciation of Organic Aerosol During the International Consortium for Atmospheric Research on Transport and Transformation 2004: Results from in Situ Measurements. *Journal of Geophysical Research-Atmospheres*, 112(D10). doi:10.1029/2006jd007601

Wisher, A., Oram, D. E., Laube, J. C., Mills, G. P., van Velthoven, P., Zahn, A., & Brenninkmeijer, C. A. M. (2014). Very Short-Lived Bromomethanes Measured by the Caribic Observatory over the North Atlantic, Africa and Southeast Asia During 2009–2013. *Atmos. Chem. Phys.*, 14(7), 3557-3570. doi:10.5194/acp-14-3557-2014

Witek, M. L., Garay, M. J., Diner, D. J., & Smirnov, A. (2013). Aerosol Optical Depths over Oceans: A View from MISR Retrievals and Collocated Man and Aeronet in Situ Observations. *Journal of Geophysical Research-Atmospheres*, 118(22), 12620-12633.

Wolfe, D. E., Brewer, W. A., Tucker, S. C., White, A. B., White, D. E., Welsh, D. C., . . . Law, D. C. (2007). Shipboard Multisensor Merged Wind Profiles from the New England Air Quality Study 2004. *Journal of Geophysical Research-Atmospheres*, 112(D10).

Wolff, G. T., Ruthkosky, M. S., Stroup, D. P., Korsog, P. E., Ferman, M. A., Wendel, G. J., & Stedman, D. H. (1986). Measurements of SO<sub>x</sub>, NO<sub>x</sub> and Aerosol Species on Bermuda. *Atmospheric Environment*, 20(6), 1229-1239.

Woods, D. C., & Osborn, M. T. (2001). Twenty-Six Years of Lidar Monitoring of Northern Midlatitude Stratospheric Aerosols. *Proceedings of SPIE*, 4168(Remote Sensing of Clouds and the Atmosphere V). doi:10.1117/12.413871

Yoon, J., Burrows, J. P., Vountas, M., von Hoyningen-Huene, W., Chang, D. Y., Richter, A., & Hilboll, A. (2014). Changes in Atmospheric Aerosol Loading Retrieved from Space-Based Measurements During the Past Decade. *Atmospheric Chemistry and Physics*, 14(13), 6881-6902. doi:10.5194/acp-14-6881-2014

Young, G. S., & Sikora, T. D. (2003). Mesoscale Stratocumulus Bands Caused by Gulf Stream Meanders. *Monthly Weather Review*, 131(9), 2177-2191.

Yu, L. S., Weller, R. A., & Sun, B. M. (2004). Mean and Variability of the WHOI Daily Latent and Sensible Heat Fluxes at in Situ Flux Measurement Sites in the Atlantic Ocean. *Journal of Climate*, 17(11), 2096-2118.

Yu, S. C., Mathur, R., Kang, D. W., Schere, K., Eder, B., & Pleim, J. (2006). Performance and Diagnostic Evaluation of Ozone Predictions by the ETA-Community Multiscale Air Quality Forecast System During the 2002 New England Air Quality Study. *Journal of the Air & Waste Management Association*, 56(10), 1459-1471. doi:10.1080/10473289.2006.10464554

Yu, S. C., Mathur, R., Schere, K., Kang, D. W., Pleim, J., & Otte, T. L. (2007). A Detailed Evaluation of the ETA-CMAQ Forecast Model Performance for O<sub>3</sub>, Its Related Precursors, and Meteorological Parameters During the 2004 ICARTT Study. *Journal of Geophysical Research-Atmospheres*, 112(D12). doi:10.1029/2006jd007715

Yu, S., Mathur, R., Sarwar, G., Kang, D., Tong, D., Pouliot, G., & Pleim, J. (2010). ETA-CMAQ Air Quality Forecasts for O<sub>3</sub> and Related Species Using Three Different Photochemical Mechanisms (CB4, CB05, SAPRC-99): Comparisons with Measurements During the 2004 ICARTT Study. *Atmospheric Chemistry and Physics*, 10(6), 3001-3025. doi:10.5194/acp-10-3001-2010

Zamora, L. M., Prospero, J. M., Hansell, D. A., & Trapp, J. M. (2013). Atmospheric P Deposition to the Subtropical North Atlantic: Sources, Properties, and Relationship to N Deposition. *Journal of Geophysical Research-Atmospheres*, 118(3), 1546-1562.

Zaucker, F., Daum, P. H., Wetterauer, U., Berkowitz, C., Kromer, B., & Broecker, W. S. (1996). Atmospheric Rn-222 Measurements During the 1993 NARE Intensive. *Journal of Geophysical Research-Atmospheres*, 101(D22), 29149-29164.

Zedler, S. E., Dickey, T. D., Doney, S. C., Price, J. F., Yu, X., & Mellor, G. L. (2002). Analyses and Simulations of the Upper Ocean's Response to Hurricane Felix at the Bermuda Testbed Mooring Site: 13-23 August 1995. *Journal of Geophysical Research-Oceans*, 107(C12). doi:10.1029/2001jc000969

Zeller, K. F., Evans, R. B., Fitzsimmons, C. K., & Siple, G. W. (1977). Mesoscale Analysis of Ozone Measurements in Boston Environs. *Journal of Geophysical Research-Oceans and Atmospheres*, 82(37), 5879-5888.

Zeng, X. B., Zhao, M., & Dickinson, R. E. (1998). Intercomparison of Bulk Aerodynamic Algorithms for the Computation of Sea Surface Fluxes Using Toga Coare and Tao Data. *Journal of Climate*, 11(10), 2628-2644. doi:10.1175/1520-0442(1998)011<2628:lobaaf>2.0.Co;2

Zhang, J., Rao, S. T., & Daggupati, S. M. (1998). Meteorological Processes and Ozone Exceedances in the Northeastern United States During the 12-16 July 1995 Episode. *Journal of Applied Meteorology*, 37(8), 776-789. doi:10.1175/1520-0450(1998)037<0776:mpaoei>2.0.co;2

Zhang, F., Snyder, C., & Rotunno, R. (2002). Mesoscale Predictability of the "Surprise" Snowstorm of 24-25 January 2000. *Monthly Weather Review*, 130(6), 1617-1632. doi:10.1175/1520-0493(2002)130<1617:mpotss>2.0.co;2

Zhang, Y. Z., Wang, Y. H., Chen, G., Smeltzer, C., Crawford, J., Olson, J., . . . Diskin, G. (2016). Large Vertical Gradient of Reactive Nitrogen Oxides in the Boundary Layer: Modeling

Analysis of DISCOVER-AQ 2011 Observations. *Journal of Geophysical Research-Atmospheres*, 121(4), 1922-1934. doi:10.1002/2015jd024203

Zhang, Y., Luo, G., & Yu, F. (2019). Seasonal Variations and Long-Term Trend of Dust Particle Number Concentration over the Northeastern United States. *Journal of Geophysical Research: Atmospheres*. doi:10.1029/2019jd031388

Zhao, T. X. P., Laszlo, I., Guo, W., Heidinger, A., Cao, C., Jelenak, A., . . . Sullivan, J. (2008). Study of Long-Term Trend in Aerosol Optical Thickness Observed from Operational AVHRR Satellite Instrument. *Journal of Geophysical Research-Atmospheres*, 113(D7).

Zhou, Y., Varner, R. K., Russo, R. S., Wingenter, O. W., Haase, K. B., Talbot, R., & Sive, B. C. (2005). Coastal Water Source of Short-Lived Halocarbons in New England. *Journal of Geophysical Research: Atmospheres*, 110(D21). doi:10.1029/2004jd005603

Zhou, X., Davis, A. J., Kieber, D. J., Keene, W. C., Maben, J. R., Maring, H., . . . Smoydzyn, L. (2008). Photochemical Production of Hydroxyl Radical and Hydroperoxides in Water Extracts of Nascent Marine Aerosols Produced by Bursting Bubbles from Sargasso Seawater. *Geophysical Research Letters*, 35(20). doi:10.1029/2008gl035418

Zhu, Y., & Kieber, D. J. (2019). Concentrations and Photochemistry of Acetaldehyde, Glyoxal, and Methylglyoxal in the Northwest Atlantic Ocean. *Environmental Science & Technology*. doi:10.1021/acs.est.9b01631

Zhu, Q., Laughner, J. L., & Cohen, R. C. (2019). Lightning No<sub>2</sub> Simulation over the Contiguous US and Its Effects on Satellite NO<sub>2</sub> Retrievals. *Atmos. Chem. Phys.*, 19(20), 13067-13078. doi:10.5194/acp-19-13067-2019

Zibordi, G., Holben, B., Hooker, S. B., Mélin, F., Berthon, J.-F., Slutsker, I., . . . Al Mandoos, A. (2006). A Network for Standardized Ocean Color Validation Measurements. *Eos, Transactions American Geophysical Union*, 87(30), 293-297. doi:10.1029/2006eo300001

Zibordi, G., Holben, B., Slutsker, I., Giles, D., D'Alimonte, D., Melin, F., . . . Seppala, J. (2009). AERONET-OC: A Network for the Validation of Ocean Color Primary Products. *Journal of Atmospheric and Oceanic Technology*, 26(8), 1634-1651.

Zielinski, T., & Piskozub, J. (2005). Studies of Aerosols in the Marine Boundary Layer in the Coastal Area During the EOPACE'99 Campaign. *Boundary-Layer Meteorology*, 116(3), 533-541. doi:10.1007/s10546-005-0904-6

Ziemba, L. D., Griffin, R. J., & Talbot, R. W. (2006). Observations of Elevated Particle Number Concentration Events at a Rural Site in New England. *Journal of Geophysical Research: Atmospheres*, 111(D23). doi:10.1029/2006jd007607

Ziemba, L. D., Fischer, E., Griffin, R. J., & Talbot, R. W. (2007). Aerosol Acidity in Rural New England: Temporal Trends and Source Region Analysis. *Journal of Geophysical Research-Atmospheres*, 112(D10).

Ziemba, L. D., Griffin, R. J., Whitlow, S., & Talbot, R. W. (2011). Characterization of Water-Soluble Organic Aerosol in Coastal New England: Implications of Variations in Size Distribution. *Atmospheric Environment*, 45(39), 7319-7329. doi:https://doi.org/10.1016/j.atmosenv.2011.08.022

Ziemba, L. D., Thornhill, K. L., Ferrare, R., Barrick, J., Beyersdorf, A. J., Chen, G., . . . Anderson, B. E. (2013). Airborne Observations of Aerosol Extinction by in Situ and Remote-

Sensing Techniques: Evaluation of Particle Hygroscopicity. *Geophysical Research Letters*, 40(2), 417-422. doi:10.1029/2012gl054428

Zuidema, P., Alvarez, C., Kramer, S. J., Custals, L., Izaguirre, M., Sealy, P., . . . Blades, E. (2019). Is Summer African Dust Arriving Earlier to Barbados? The Updated Long-Term in-Situ Dust Mass Concentration Time Series from Ragged Point, Barbados and Miami, Florida. *Bulletin of the American Meteorological Society*. doi:10.1175/bams-d-18-0083.1
